# Supplementary material
Source: publisher site journal article supplement (https://www.dovepress.com/article/391761)
Supplement: Supplementary file 1 [file get_supplementary_file.php]

Tab. S1. Full array map of inflammation factors analyzed in HSkM cells treated for 24 hours with S proteins, graphene oxide (GO), S proteins and GO, and ones belonging to the control group (non-treated)

|   | 1      | 2              | 3             | 4            | 5        | 6         | 7       | 8      | 9      | 10             | 11            | 12             |
|---|--------|----------------|---------------|--------------|----------|-----------|---------|--------|--------|----------------|---------------|----------------|
| A | POS    | POS            | NEG           | NEG          | EOTAXIN  | EOTAXIN-2 | GCSF    | GM-CSF | ICAM-1 | IFN- $\gamma$  | I-309         | IL-1 $\alpha$  |
| B | POS    | POS            | NEG           | NEG          | EOTAXIN  | EOTAXIN-2 | GCSF    | GM-CSF | ICAM-1 | IFN- $\gamma$  | I-309         | IL-1 $\alpha$  |
| C | IL-1b  | IL-2           | IL-3          | IL-4         | IL-6     | IL-6sR    | IL-7    | IL-8   | IL-10  | IL-11          | IL-12 p40     | IL-12 p70      |
| D | IL-1b  | IL-2           | IL-3          | IL-4         | IL-6     | IL-6sR    | IL-7    | IL-8   | IL-10  | IL-11          | IL-12 p40     | IL-12 p70      |
| E | IL-13  | IL-15          | IL-16         | IL-17        | IP-10    | MCP-1     | MCP-2   | M-CSF  | MIG    | MIP-1 $\alpha$ | MIP-1 $\beta$ | MIP-1 $\delta$ |
| F | IL-13  | IL-15          | IL-16         | IL-17        | IP-10    | MCP-1     | MCP-2   | M-CSF  | MIG    | MIP-1 $\alpha$ | MIP-1 $\beta$ | MIP-1 $\delta$ |
| G | RANTES | TGF- $\beta$ 1 | TNF- $\alpha$ | TNF- $\beta$ | s TNF RI | s TNF RII | PDGF-BB | TIMP-2 | BLANK  | BLANK          | NEG           | POS            |
| H | RANTES | TGF- $\beta$ 1 | TNF- $\alpha$ | TNF- $\beta$ | s TNF RI | s TNF RII | PDGF-BB | TIMP-2 | BLANK  | BLANK          | NEG           | POS            |







|            |                                        |        |    |    |    |    |    |    |    |    |    |    |          |          |          |          |          |          |          |          |          |          |          |          |          |    |    |     |     |     |    |     |     |     |           |           |           |            |            |            |       |
|------------|----------------------------------------|--------|----|----|----|----|----|----|----|----|----|----|----------|----------|----------|----------|----------|----------|----------|----------|----------|----------|----------|----------|----------|----|----|-----|-----|-----|----|-----|-----|-----|-----------|-----------|-----------|------------|------------|------------|-------|
| AT1A1      | Sodium/po P05023 AT1A1_HUMAN           | 232,94 | 16 | 23 | 22 | 11 | 16 | 22 | 18 | 13 | 15 | 10 | 22       | 2,48E+07 | 2,92E+07 | 3,01E+07 | 1,88E+06 | 6,47E+06 | 4,13E+07 | 4,64E+07 | 1,16E+07 | 5,22E+06 | 3,06E+06 | 1,37E+07 | 38       | 24 | 52 | 62  | 52  | 17  | 38 | 64  | 53  | 38  | 32        | 19        | 54        | Phosphoryl | 112896     |            |       |
| ACADV      | Very long-c P49748 ACADV_HUMAN         | 232,89 | 33 | 23 | 33 | 13 | 28 | 33 | 28 | 23 | 29 | 25 | 34       | 1,79E+07 | 2,54E+07 | 1,81E+07 | 2,14E+06 | 1,34E+07 | 3,94E+07 | 3,39E+07 | 6,04E+06 | 6,31E+06 | 3,79E+05 | 1,93E+07 | 36       | 36 | 48 | 51  | 50  | 14  | 40 | 57  | 51  | 29  | 42        | 29        | 61        | Phosphoryl | 70390      |            |       |
| ACADY      | ATP-citrate P53396 ACADY_HUMAN         | 232,84 | 23 | 21 | 27 | 0  | 11 | 20 | 25 | 18 | 3  | 2  | 10       | 2,24E+07 | 2,86E+07 | 2,99E+07 |          | 1,01E+06 | 3,84E+07 | 7,82E+07 | 2,01E+07 | 1,04E+06 | 2,76E+05 | 1,14E+06 | 34       | 34 | 45 | 44  | 46  | 0   | 16 | 45  | 63  | 43  | 5         | 4         | 15        | Beta-meth  | 120839     |            |       |
| H23E2      | Histone-H2 Q17878 H23E2_HUMAN          | 232,42 | 57 | 52 | 52 | 35 | 62 | 65 | 62 | 57 | 35 | 25 | 62       | 17       | 2,97E+07 | 5,48E+07 | 3,53E+07 | 4,67E+07 | 4,21E+07 | 4,56E+07 | 2,17E+07 | 1,40E+07 | 3,69E+07 | 2,00E+07 | 49       | 48 | 44 | 55  | 54  | 21  | 38 | 70  | 57  | 28  | 16        | 50        | Beta-meth | 157904     |            |            |       |
| RLA1       | 60S acidic P05386 RLA1_HUMAN           | 231,67 | 57 | 57 | 57 | 36 | 57 | 68 | 57 | 43 | 43 | 43 | 4,13E+07 | 1,60E+07 | 1,34E+07 | 2,81E+04 | 4,05E+06 | 1,83E+07 | 2,16E+07 | 1,43E+07 | 3,74E+06 | 1,17E+06 | 7,27E+06 | 21       | 21       | 26 | 27 | 25  | 3   | 18  | 29 | 28  | 24  | 19  | 9         | 29        | Beta-meth | 11514      |            |            |       |
| MYL6       | Myosin light P06060 MYL6_HUMAN         | 231,62 | 73 | 61 | 51 | 58 | 54 | 68 | 57 | 43 | 58 | 72 | 0        |          |          |          |          |          |          |          |          |          |          |          | 48       | 1  | 76 | 83  | 62  | 51  | 70 | 74  | 81  | 72  | 90        | 83        | 93        | Phosphoryl | 16930      |            |       |
| KC26B      | Keratin type P04259 KC26B_HUMAN        | 231,61 | 22 | 22 | 20 | 48 | 19 | 21 | 14 | 20 | 23 | 21 |          |          |          |          |          |          |          |          |          |          |          |          | 65       | 1  | 88 | 114 | 97  | 584 | 82 | 91  | 62  | 71  | 104       | 119       | 159       | Beta-meth  | 60629      |            |       |
| FWB1K7     | Mucin type P19370 FWB1K7_HUMAN         | 231,13 | 57 | 63 | 53 | 53 | 61 | 56 | 63 | 56 | 79 | 74 |          | 7,89E+05 |          |          |          |          |          |          |          |          |          |          | 48       | 1  | 74 | 81  | 62  | 51  | 71 | 84  | 81  | 72  | 90        | 83        | 93        | Phosphoryl | 16290      |            |       |
| GVXV0      | Mucin type P19370 GVXV0_HUMAN          | 231,13 | 57 | 63 | 53 | 53 | 61 | 56 | 63 | 56 | 79 | 74 |          |          |          |          |          |          |          |          |          |          |          |          | 48       | 1  | 74 | 81  | 62  | 51  | 71 | 84  | 81  | 72  | 90        | 83        | 93        | Phosphoryl | 16290      |            |       |
| AT2B4      | Plasma net P23634 AT2B4_HUMAN          | 230,96 | 14 | 16 | 16 | 12 | 14 | 12 | 15 | 12 | 12 | 12 | 12       | 4,73E+06 | 1,11E+07 | 1,09E+07 | 5,94E+06 | 1,56E+06 | 1,06E+07 | 1,04E+07 | 1,82E+06 | 3,59E+06 | 2,60E+06 | 5,56E+06 | 27       | 13 | 26 | 37  | 48  | 13  | 31 | 43  | 33  | 22  | 21        | 25        | 34        | Beta-meth  | 137920     |            |       |
| SEF31      | Splicing fac P07533 SEF31_HUMAN        | 230,85 | 14 | 12 | 5  | 5  | 21 | 13 | 16 | 6  | 3  | 8  | 8        | 1,41E+07 | 3,47E+07 | 1,97E+07 | 1,40E+05 | 1,60E+05 | 4,58E+07 | 3,18E+07 | 2,82E+07 | 6,41E+05 | 2,21E+06 | 2,00E+06 | 39       | 39 | 29 | 32  | 32  | 5   | 7  | 53  | 46  | 33  | 11        | 4         | 15        | Phosphoryl | 145830     |            |       |
| SEPT9      | Septin-9 Q09108 SEPT9_HUMAN            | 230,79 | 39 | 36 | 40 | 7  | 15 | 32 | 43 | 36 | 15 | 10 | 17       | 2,90E+07 | 6,56E+07 | 7,41E+07 | 1,92E+06 | 3,63E+06 | 7,28E+07 | 1,07E+08 | 4,31E+07 | 3,99E+06 | 1,24E+06 | 3,12E+06 | 34       | 33 | 43 | 61  | 68  | 6   | 10 | 52  | 84  | 47  | 14        | 5         | 19        | Phosphoryl | 65402      |            |       |
| LPRK2      | Lectin-like P42704 LPRK2_HUMAN         | 230,39 | 15 | 22 | 23 | 14 | 22 | 20 | 11 | 11 | 10 | 17 | 17       | 2,97E+07 | 5,48E+07 | 3,53E+07 | 4,67E+07 | 4,21E+07 | 4,56E+07 | 2,17E+07 | 1,40E+07 | 3,69E+07 | 2,00E+07 | 49       | 48       | 44 | 55 | 54  | 21  | 38  | 70 | 57  | 28  | 16  | 50        | Beta-meth | 157904    |            |            |            |       |
| ADAD04H40  | Lectin-like tr ADAD04H40 ADAD04_HUMAN  | 230,31 | 22 | 22 | 22 | 9  | 14 | 22 | 20 | 11 | 10 | 17 | 2,97E+07 | 5,48E+07 | 3,53E+07 | 4,67E+07 | 4,21E+07 | 4,56E+07 | 2,17E+07 | 1,40E+07 | 3,69E+07 | 2,00E+07 | 49       | 48       | 44       | 55 | 54 | 21  | 38  | 70  | 57 | 28  | 16  | 50  | Beta-meth | 157775    |           |            |            |            |       |
| ABMXP9     | Matrin-3 Q tr ABMXP9 ABMXP9_HUMAN      | 230,31 | 28 | 25 | 24 | 13 | 17 | 21 | 23 | 21 | 16 | 18 | 1,04E+08 | 9,70E+07 | 9,24E+07 | 6,91E+06 | 2,81E+07 | 1,66E+08 | 1,62E+08 | 5,39E+07 | 2,97E+07 | 9,29E+06 | 6,19E+07 | 38       | 38       | 63 | 64 | 55  | 23  | 47  | 81 | 62  | 53  | 34  | 40        | 53        | Beta-meth | 99667      |            |            |       |
| ADADR4Z8   | Matrin-3 Q tr ADADR4Z8 ADADR4_HUMAN    | 230,31 | 29 | 25 | 25 | 14 | 18 | 31 | 25 | 22 | 17 | 18 | 1,04E+08 | 9,70E+07 | 9,24E+07 | 6,91E+06 | 2,81E+07 | 1,66E+08 | 1,62E+08 | 5,39E+07 | 2,97E+07 | 9,29E+06 | 6,19E+07 | 37       | 37       | 62 | 63 | 55  | 23  | 47  | 78 | 62  | 53  | 34  | 40        | 53        | Beta-meth | 94623      |            |            |       |
| MATR3      | Matrin-3 Q P44243 MATR3_HUMAN          | 230,31 | 29 | 25 | 25 | 14 | 18 | 31 | 25 | 22 | 17 | 18 | 1,04E+08 | 9,70E+07 | 9,24E+07 | 6,91E+06 | 2,81E+07 | 1,66E+08 | 1,62E+08 | 5,39E+07 | 2,97E+07 | 9,29E+06 | 6,19E+07 | 37       | 37       | 62 | 63 | 55  | 23  | 47  | 78 | 62  | 53  | 34  | 40        | 53        | Beta-meth | 94623      |            |            |       |
| SRC1       | Sarcoplasm P23237 SRC1_HUMAN           | 230,18 | 32 | 25 | 25 | 17 | 19 | 29 | 32 | 26 | 20 | 25 | 27       | 2,06E+07 | 2,00E+07 | 1,18E+07 | 2,61E+06 | 5,72E+06 | 2,82E+07 | 3,49E+07 | 1,35E+07 | 4,88E+06 | 4,82E+06 | 1,33E+07 | 23       | 23 | 35 | 30  | 24  | 16  | 34 | 16  | 34  | 44  | 27        | 17        | 14        | 33         | Phosphoryl | 80244      |       |
| MOQ243     | Sarcoplasm tr MOQ243 MOQ243_HUMAN      | 230,18 | 33 | 26 | 26 | 18 | 20 | 31 | 23 | 27 | 21 | 26 | 18       | 2,06E+07 | 2,00E+07 | 1,18E+07 | 2,61E+06 | 5,72E+06 | 2,82E+07 | 3,49E+07 | 1,35E+07 | 4,88E+06 | 4,82E+06 | 1,33E+07 | 23       | 23 | 35 | 30  | 27  | 14  | 16 | 34  | 16  | 34  | 44        | 27        | 17        | 14         | 33         | Phosphoryl | 77572 |
| TBB6       | Tubulin bet Q98U57 TBB6_HUMAN          | 230,14 | 50 | 55 | 59 | 6  | 21 | 44 | 63 | 53 | 23 | 20 | 35       | 5,19E+06 | 2,31E+07 | 3,89E+07 | 1,24E+05 | 2,45E+06 | 1,41E+07 | 4,67E+07 | 7,64E+06 | 1,53E+06 | 5,78E+05 | 1,22E+06 | 39       | 9  | 69 | 106 | 118 | 2   | 20 | 79  | 119 | 73  | 18        | 18        | 32        | Beta-meth  | 48957      |            |       |
| PSCS       | Delta-1-pp P54886 PSCS_HUMAN           | 230,09 | 28 | 33 | 26 | 7  | 24 | 30 | 28 | 22 | 14 | 14 | 20       | 4,18E+07 | 6,31E+07 | 7,64E+07 | 3,29E+05 | 1,94E+07 | 7,46E+07 | 2,34E+07 | 6,37E+06 | 5,04E+05 | 1,76E+07 | 37       | 37       | 43 | 62 | 57  | 6   | 41  | 62 | 51  | 27  | 21  | 15        | 34        | Beta-meth | 87302      |            |            |       |
| HXK1       | Hexokinase P19367 HXK1_HUMAN           | 230,06 | 28 | 29 | 30 | 12 | 23 | 27 | 24 | 20 | 16 | 14 | 21       | 3,75E+07 | 6,09E+07 | 4,71E+07 | 3,47E+06 | 1,79E+07 | 5,55E+07 | 6,12E+07 | 1,73E+07 | 9,75E+06 | 6,03E+06 | 2,94E+07 | 43       | 43 | 47 | 57  | 66  | 0   | 54 | 32  | 34  | 34  | 35        | 55        | Beta-meth | 102486     |            |            |       |
| ADAD0M1T01 | Actin-depo tr ADAD0M1T01 ADAD0_HUMAN   | 229,74 | 20 | 23 | 24 | 5  | 16 | 18 | 24 | 22 | 13 | 10 | 20       | 2,37E+07 | 4,37E+07 | 4,79E+07 | 1,03E+06 | 4,81E+06 | 2,56E+07 | 6,10E+07 | 2,32E+07 | 4,19E+06 | 6,51E+06 | 1,56E+07 | 33       | 33 | 38 | 44  | 41  | 3   | 17 | 23  | 44  | 31  | 16        | 17        | 14        | 34         | Phosphoryl | 84745      |       |
| ADAD0M551  | Actin-depo tr ADAD0M551 ADAD0_HUMAN    | 229,74 | 21 | 23 | 24 | 5  | 15 | 19 | 25 | 23 | 14 | 10 | 20       | 2,37E+07 | 4,37E+07 | 4,79E+07 | 1,03E+06 | 4,81E+06 | 2,56E+07 | 6,10E+07 | 2,32E+07 | 4,19E+06 | 6,51E+06 | 1,56E+07 | 32       | 32 | 38 | 44  | 41  | 3   | 17 | 23  | 44  | 31  | 16        | 17        | 14        | 34         | Phosphoryl | 82526      |       |
| GELS       | Gelsolin Q5 P06396 GELS_HUMAN          | 229,74 | 20 | 23 | 23 | 4  | 15 | 18 | 24 | 22 | 13 | 10 | 20       | 2,37E+07 | 4,37E+07 | 4,79E+07 | 1,03E+06 | 4,81E+06 | 2,56E+07 | 6,10E+07 | 2,32E+07 | 4,19E+06 | 6,51E+06 | 1,40E+07 | 33       | 33 | 38 | 44  | 41  | 3   | 17 | 23  | 44  | 31  | 16        | 17        | 14        | 34         | Phosphoryl | 85697      |       |
| HNRC2      | Heterogeneous P07910 HNRC2_HUMAN       | 229,72 | 54 | 43 | 44 | 25 | 25 | 27 | 43 | 37 | 25 | 26 | 28       | 1,99E+06 | 2,01E+06 |          |          |          | 0        | 2,47E+06 |          |          |          |          | 21       | 1  | 94 | 79  | 73  | 34  | 49 | 75  | 56  | 54  | 58        | 37        | 52        | Phosphoryl | 33670      |            |       |
| SOX1       | Sox1 type P34971 SOX1_HUMAN            | 229,54 | 39 | 24 | 29 | 32 | 34 | 29 | 32 | 34 | 27 | 19 | 21       | 6,64E+07 | 6,67E+07 | 3,40E+07 | 4,45E+06 | 1,53E+07 | 6,64E+07 | 3,92E+06 | 6,41E+06 | 4,79E+06 | 2,20E+07 | 36       | 36       | 45 | 48 | 48  | 34  | 49  | 38 | 49  | 33  | 21  | 17        | 43        | Beta-meth | 55993      |            |            |       |
| PHB        | Prohibitin P135232 PHB_HUMAN           | 229,37 | 72 | 60 | 64 | 46 | 65 | 60 | 64 | 48 | 45 | 55 | 66       | 7,55E+07 | 1,19E+08 | 8,32E+07 | 2,71E+07 | 6,80E+07 | 1,39E+08 | 1,02E+08 | 3,68E+07 | 4,64E+07 | 3,17E+07 | 1,44E+08 | 36       | 36 | 62 | 64  | 56  | 33  | 66 | 72  | 52  | 36  | 60        | 59        | 82        | Phosphoryl | 29804      |            |       |
| CD99       | CD99 anti tr P14209 CD99_HUMAN         | 228,7  | 61 | 54 | 60 | 24 | 40 | 54 | 54 | 54 | 54 | 54 | 54       | 3,24E+07 | 3,29E+07 | 2,89E+07 | 2,89E+07 | 8,95E+07 | 3,78E+07 | 3,42E+07 | 2,03E+07 | 1,09E+07 | 1,16E+07 | 1,73E+07 | 5        | 4  | 67 | 52  | 56  | 7   | 29 | 60  | 57  | 43  | 29        | 22        | 42        | Phosphoryl | 18848      |            |       |
| ADAG06PGG5 | Collagen inh tr ADAG06PGG5 ADAG6_HUMAN | 228,62 | 25 | 31 | 31 | 6  | 1  | 23 | 27 | 16 | 4  | 2  | 8        | 3,18E+06 | 2,05E+06 | 3,31E+06 |          |          | 4,55E+06 | 3,07E+06 |          |          |          |          | 3        | 3  | 35 | 42  | 49  | 3   | 1  | 6   | 43  | 49  | 2         | 1         | 5         | Phosphoryl | 71606      |            |       |
| CO6A2      | Collierin PI12110 CO6A2_HUMAN          | 228,23 | 23 | 24 | 21 | 8  | 15 | 20 | 20 | 17 | 10 | 12 | 15       | 9,47E+07 | 1,18E+08 | 9,59E+07 | 4,32E+06 | 3,38E+07 | 1,04E+08 | 9,71E+07 | 5,08E+07 | 2,14E+07 | 1,02E+07 | 4,31E+07 | 41       | 41 | 73 | 75  | 74  | 13  | 37 | 69  | 66  | 53  | 30        | 2         | 4         | 47         | Beta-meth  | 108579     |       |
| GLI2B      | Glucosylas PI1314 GLI2B_HUMAN          | 228,23 | 25 | 25 | 25 | 20 | 25 | 20 | 25 | 22 | 15 | 20 | 25       | 7,05E+07 | 1,24E+08 | 8,45E+07 | 1,41E+07 | 3,96E+07 | 1,74E+08 | 1,68E+08 | 7,47E+07 | 4,10E+07 | 1,62E+07 | 8,22E+07 | 37       | 37 | 62 | 77  | 63  | 36  | 63 | 73  | 76  | 71  | 64        | 44        | 77        | Phosphoryl | 59426      |            |       |
| KYEL7      | Glucosylas tr KYEL7 KYEL7_HUMAN        | 227,67 | 24 | 23 | 15 | 20 | 22 | 25 | 21 | 22 | 17 | 14 | 24       | 7,05E+07 | 1,24E+08 | 8,45E+07 | 1,41E+07 | 3,96E+07 | 1,74E+08 | 1,68E+08 | 7,47E+07 | 4,10E+07 | 1,62E+07 | 8,22E+07 | 37       | 37 | 62 | 77  | 63  | 36  | 63 | 73  | 76  | 71  | 64        | 44        | 77        | Phosphoryl | 60192      |            |       |
| HOYK48     | Topomoyas tr HOYK48 HOYK48_HUMAN       | 227,65 | 49 | 48 | 54 | 48 | 48 | 49 | 46 | 40 | 49 | 49 | 56       | 7        | 7,05E+07 | 1,24E+08 | 8,45E+07 | 1,41E+07 | 3,96E+07 | 1,74E+08 | 1,68E+08 | 7,47E+07 | 4,10E+07 | 1,62E+07 | 8,22E+07 | 57 | 0  | 93  | 104 | 114 | 92 | 123 | 140 | 122 | 92        | 159       | 130       | 158        | Beta-meth  | 28580      |       |
| HOY24      | Topomoyas tr HOY24 HOY24_HUMAN         | 227,65 | 49 | 48 | 54 | 48 | 48 | 49 | 46 | 40 | 49 | 49 | 56       | 7        | 7,05E+07 | 1,24E+08 | 8,45E+07 | 1,41E+07 | 3,96E+07 | 1,74E+08 | 1,6      |          |          |          |          |    |    |     |     |     |    |     |     |     |           |           |           |            |            |            |       |

|                               |                                      |        |    |    |    |    |    |    |    |    |    |    |           |          |          |          |          |          |          |          |          |          |          |          |    |     |     |     |     |     |     |     |     |     |            |            |            |            |        |
|-------------------------------|--------------------------------------|--------|----|----|----|----|----|----|----|----|----|----|-----------|----------|----------|----------|----------|----------|----------|----------|----------|----------|----------|----------|----|-----|-----|-----|-----|-----|-----|-----|-----|-----|------------|------------|------------|------------|--------|
| MXRA7                         | Matrix- $\alpha$ P84157 MXRA7_HUMA   | 213.69 | 52 | 47 | 56 | 40 | 52 | 54 | 53 | 48 | 42 | 45 | 52        | 4,00E+07 | 4,53E+07 | 3,98E+07 | 9,05E+06 | 2,57E+07 | 6,43E+07 | 6,42E+07 | 2,68E+07 | 2,39E+07 | 8,96E+06 | 3,81E+07 | 26 | 15  | 47  | 34  | 40  | 16  | 34  | 38  | 36  | 29  | 26         | 19         | 34         | Phosphoryl | 21466  |
| PABP1                         | Polyadenyl 11940 PABP1_HUMA          | 213.45 | 33 | 32 | 32 | 10 | 17 | 29 | 40 | 25 | 10 | 11 | 13        | 9,30E+06 | 1,16E+07 | 7,09E+06 | 1,59E+05 | 4,30E+05 | 1,44E+07 | 1,91E+07 | 6,48E+06 | 8,79E+05 | 1,86E+05 | 1,15E+06 | 33 | 11  | 33  | 42  | 44  | 5   | 14  | 43  | 55  | 32  | 12         | 8          | 12         | Phosphoryl | 70671  |
| ADAD72V49                     | Polyderyl 11 ADAD72V49 AOA712        | 213.45 | 35 | 34 | 33 | 11 | 18 | 32 | 42 | 27 | 11 | 11 | 14        | 9,30E+06 | 1,16E+07 | 7,09E+06 | 1,59E+05 | 4,30E+05 | 1,44E+07 | 1,91E+07 | 6,48E+06 | 8,79E+05 | 1,86E+05 | 1,15E+06 | 32 | 10  | 33  | 42  | 43  | 5   | 14  | 43  | 55  | 32  | 12         | 8          | 12         | Phosphoryl | 65118  |
| CI2BP                         | Citrate synthase 1 CI2BP_HUMA        | 213.24 | 35 | 34 | 33 | 11 | 18 | 32 | 42 | 27 | 11 | 11 | 14        | 9,30E+06 | 1,16E+07 | 7,09E+06 | 1,59E+05 | 4,30E+05 | 1,44E+07 | 1,91E+07 | 6,48E+06 | 8,79E+05 | 1,86E+05 | 1,15E+06 | 32 | 10  | 33  | 42  | 43  | 5   | 14  | 43  | 55  | 32  | 12         | 8          | 12         | Phosphoryl | 65118  |
| PHB2                          | Phorbol-1-O-9-O-acetate PHB2_HUMAN   | 212.95 | 45 | 38 | 39 | 26 | 37 | 27 | 39 | 32 | 28 | 40 | 43        | 4,57E+07 | 5,64E+07 | 4,17E+07 | 1,14E+07 | 2,68E+07 | 6,43E+07 | 4,54E+07 | 1,69E+07 | 1,83E+07 | 1,40E+07 | 6,70E+07 | 32 | 32  | 44  | 43  | 40  | 15  | 44  | 51  | 42  | 25  | 24         | 26         | 54         | Deamidat   | 33296  |
| CAVN2                         | Caveolin-1 O95810 CAVN2_HUMAN        | 212.6  | 33 | 30 | 26 | 21 | 37 | 29 | 30 | 16 | 24 | 19 | 28        | 3,50E+07 | 4,66E+07 | 4,24E+07 | 3,34E+06 | 1,59E+06 | 4,38E+07 | 1,82E+07 | 7,94E+06 | 3,85E+06 | 1,99E+07 | 29       | 29 | 46  | 48  | 45  | 11  | 35  | 45  | 28  | 29  | 19  | 32         | Phosphoryl | 47173      |            |        |
| FUMH                          | Fumarate 1 P07954 FUMH_HUMAN         | 212.51 | 24 | 21 | 24 | 17 | 26 | 24 | 20 | 15 | 28 | 32 | 32        | 1,46E+07 | 2,25E+07 | 2,28E+07 | 2,41E+06 | 1,72E+07 | 3,58E+07 | 1,98E+07 | 7,48E+06 | 4,92E+06 | 4,17E+06 | 2,32E+07 | 21 | 21  | 24  | 26  | 23  | 27  | 37  | 28  | 22  | 13  | 26         | 41         | Deamidat   | 54637      |        |
| STM2L                         | Somatostatin-2 Q9JUZ1 STM2L_HUMAN    | 212.19 | 40 | 40 | 31 | 19 | 22 | 31 | 29 | 19 | 22 | 28 | 2,08E+07  | 3,10E+07 | 2,50E+07 | 5,90E+06 | 1,76E+07 | 2,55E+07 | 2,74E+07 | 6,18E+06 | 4,22E+07 | 6,18E+06 | 2,32E+07 | 22       | 22 | 28  | 32  | 30  | 16  | 31  | 29  | 24  | 18  | 28  | 21         | 34         | Phosphoryl | 38534      |        |
| ADAM87VW4                     | Somatostatin-1 ADAM87VW4 ADAM8       | 212.19 | 40 | 40 | 31 | 19 | 22 | 31 | 29 | 19 | 22 | 28 | 2,08E+07  | 3,10E+07 | 2,50E+07 | 5,90E+06 | 1,76E+07 | 2,55E+07 | 2,74E+07 | 6,18E+06 | 4,22E+07 | 6,18E+06 | 2,32E+07 | 22       | 22 | 28  | 32  | 30  | 16  | 31  | 29  | 24  | 18  | 28  | 21         | 34         | Phosphoryl | 38534      |        |
| SRC8                          | Src substra 1 Q14247 SRC8_HUMAN      | 211.83 | 29 | 33 | 31 | 0  | 0  | 0  | 0  | 0  | 0  | 0  | 2,16E+07  | 3,77E+07 | 2,43E+07 | 0        | 0        | 3,32E+07 | 3,81E+07 | 1,32E+07 | 0        | 0        | 0        | 21       | 21 | 40  | 54  | 43  | 0   | 0   | 45  | 48  | 38  | 0   | 0          | 0          | Phosphoryl | 61586      |        |
| B4DV2                         | Citrate svt 1 B4DV2 B4DV2_HUF        | 211.73 | 20 | 20 | 26 | 6  | 19 | 24 | 25 | 16 | 17 | 24 | 2,19E+07  | 2,62E+07 | 1,90E+07 | 1,49E+06 | 6,62E+06 | 3,94E+07 | 4,10E+07 | 4,64E+06 | 2,63E+06 | 5,02E+06 | 1,27E+07 | 32       | 31 | 38  | 39  | 40  | 10  | 22  | 35  | 13  | 12  | 24  | 30         | Phosphoryl | 50432      |            |        |
| CSA                           | Citrate svt 075390 CSV_HUMAN         | 211.75 | 22 | 20 | 26 | 6  | 19 | 24 | 24 | 15 | 15 | 16 | 23        | 2,19E+07 | 2,62E+07 | 1,90E+07 | 1,49E+06 | 6,62E+06 | 3,94E+07 | 4,10E+07 | 4,64E+06 | 2,63E+06 | 5,02E+06 | 1,27E+07 | 31 | 30  | 38  | 39  | 40  | 10  | 22  | 35  | 13  | 12  | 23         | 30         | Phosphoryl | 51712      |        |
| L1MN2                         | Lamin B2 Q01352 L1MN2_HUMM           | 211.5  | 35 | 34 | 33 | 20 | 31 | 25 | 30 | 28 | 31 | 25 | 36        | 3,28E+07 | 6,61E+07 | 4,60E+07 | 5,45E+06 | 2,21E+07 | 4,93E+07 | 1,70E+07 | 1,74E+07 | 4,97E+06 | 4,30E+07 | 46       | 41 | 55  | 67  | 63  | 41  | 66  | 76  | 61  | 57  | 38  | 84         | Phosphoryl | 65948      |            |        |
| RY5                           | 45S riboso P08685 RY5_HUMAN          | 211.45 | 40 | 40 | 40 | 6  | 30 | 40 | 40 | 40 | 40 | 40 | 22        | 27       | 3,32E+07 | 5,30E+07 | 4,82E+07 | 0        | 6,56E+06 | 4,20E+07 | 1,20E+08 | 4,20E+07 | 2,68E+07 | 1,12E+08 | 19 | 19  | 40  | 51  | 48  | 1   | 12  | 42  | 54  | 44  | 12         | 9          | 20         | Phosphoryl | 32854  |
| RAB1B                         | Ras-relate Q9H0U4 RAB1B_HUMAN        | 211.22 | 53 | 45 | 45 | 23 | 39 | 55 | 46 | 30 | 26 | 37 | 44        | 7,49E+06 | 1,06E+07 | 1,13E+07 | 0        | 0        | 7,83E+06 | 1,68E+07 | 3,24E+06 | 2,24E+06 | 6,93E+06 | 21       | 2  | 26  | 29  | 23  | 11  | 14  | 34  | 30  | 21  | 16  | 16         | 27         | Phosphoryl | 22171      |        |
| PAIR8                         | Plasminogen Q8NC25 PAIR8_HUMAN       | 211.08 | 42 | 42 | 38 | 4  | 2  | 40 | 47 | 39 | 0  | 0  | 7         | 2,92E+07 | 5,11E+07 | 4,38E+07 | 0        | 0        | 6,03E+07 | 1,38E+08 | 5,79E+07 | 0        | 0        | 26       | 26 | 37  | 48  | 41  | 1   | 1   | 47  | 68  | 43  | 0   | 0          | 3          | Phosphoryl | 44965      |        |
| RL3                           | 60S riboso P39023 RL3_HUMAN          | 210.71 | 28 | 27 | 19 | 3  | 9  | 28 | 30 | 21 | 7  | 7  | 11        | 4,03E+07 | 6,29E+07 | 4,93E+07 | 7,01E+05 | 2,91E+06 | 6,22E+07 | 1,36E+08 | 3,35E+07 | 2,08E+06 | 1,27E+06 | 1,10E+07 | 17 | 17  | 34  | 32  | 29  | 3   | 6   | 26  | 45  | 33  | 4          | 5          | 6          | Phosphoryl | 46109  |
| SEPR                          | Prolyl endo Q12884 SEPR_HUMAN        | 210.6  | 15 | 15 | 20 | 7  | 16 | 18 | 21 | 12 | 13 | 14 | 19        | 1,84E+07 | 2,17E+07 | 2,56E+07 | 2,74E+06 | 1,82E+07 | 3,14E+07 | 9,04E+06 | 8,43E+06 | 7,24E+06 | 2,38E+07 | 33       | 33 | 25  | 29  | 44  | 8   | 31  | 44  | 46  | 21  | 23  | 17         | 40         | Deamidat   | 87133      |        |
| ADAD09SS1N1                   | Prolyl endo 1 ADAD09SS1N1 ADAD0      | 210.6  | 15 | 15 | 20 | 7  | 16 | 18 | 21 | 12 | 13 | 14 | 19        | 1,84E+07 | 2,17E+07 | 2,56E+07 | 2,74E+06 | 1,82E+07 | 3,14E+07 | 9,04E+06 | 8,43E+06 | 7,24E+06 | 2,38E+07 | 33       | 33 | 25  | 29  | 44  | 8   | 31  | 44  | 46  | 21  | 23  | 17         | 40         | Deamidat   | 87584      |        |
| K1C17                         | Keratin ty Q04695 K1C17_HUMAN        | 210.55 | 19 | 20 | 12 | 45 | 15 | 17 | 7  | 9  | 17 | 13 | 20        | 1,95E+06 | 5,53E+05 | 1,24E+07 | 0        | 0        | 0        | 0        | 4,17E+05 | 0        | 0        | 5,92E+05 | 55 | 17  | 24  | 23  | 19  | 260 | 20  | 15  | 7   | 13  | 29         | 22         | 43         | Phosphoryl | 48106  |
| RAB1A                         | Ras-relate P62820 RAB1A_HUMAN        | 210.25 | 44 | 42 | 45 | 33 | 41 | 53 | 39 | 33 | 36 | 29 | 36        | 1,77E+06 | 3,29E+06 | 4,57E+05 | 0        | 0        | 8,00E+06 | 3,72E+06 | 1,41E+06 | 0        | 0        | 8,04E+05 | 4  | 4   | 23  | 27  | 24  | 12  | 15  | 31  | 18  | 17  | 14         | 26         | Phosphoryl | 22678      |        |
| F5H753                        | Peroxoxim 1 F5H753 F5H753_HUF        | 210.1  | 48 | 47 | 49 | 52 | 44 | 48 | 47 | 43 | 43 | 51 | 42        | 2,62E+07 | 6,46E+07 | 7,02E+07 | 3,54E+06 | 1,26E+07 | 5,63E+07 | 9,76E+07 | 4,12E+07 | 1,98E+07 | 4,06E+06 | 2,84E+07 | 52 | 0   | 92  | 103 | 111 | 95  | 125 | 136 | 121 | 98  | 162        | 130        | 146        | Deamidat   | 26525  |
| L433E                         | Gamma- $\gamma$ 1 P02258 L433E_HUMAN | 209.99 | 31 | 47 | 49 | 25 | 40 | 45 | 51 | 42 | 43 | 31 | 47        | 2,64E+07 | 6,46E+07 | 7,02E+07 | 3,54E+06 | 1,26E+07 | 5,63E+07 | 9,76E+07 | 4,12E+07 | 1,98E+07 | 4,06E+06 | 2,84E+07 | 27 | 19  | 61  | 69  | 62  | 19  | 40  | 65  | 57  | 67  | 52         | 32         | 51         | Deamidat   | 29254  |
| DBH4                          | Peroxoxim P51659 DBH4_HUMAN          | 209.57 | 27 | 27 | 27 | 18 | 25 | 30 | 23 | 15 | 15 | 15 | 18        | 2,02E+07 | 2,37E+07 | 1,98E+07 | 1,04E+06 | 5,84E+06 | 2,83E+07 | 3,10E+07 | 7,56E+06 | 2,09E+06 | 1,73E+06 | 6,49E+06 | 24 | 24  | 33  | 34  | 41  | 8   | 16  | 40  | 40  | 15  | 11         | 8          | 20         | Phosphoryl | 79868  |
| E7EP19                        | Peroxoxim 1 E7EP19 E7EP19_HUF        | 209.57 | 28 | 28 | 28 | 8  | 19 | 26 | 29 | 21 | 22 | 16 | 18        | 2,02E+07 | 2,37E+07 | 1,98E+07 | 1,04E+06 | 5,84E+06 | 2,83E+07 | 3,10E+07 | 7,56E+06 | 2,09E+06 | 1,73E+06 | 6,49E+06 | 24 | 24  | 33  | 34  | 41  | 8   | 16  | 40  | 40  | 15  | 11         | 8          | 20         | Phosphoryl | 79833  |
| ADAD289V50                    | Peroxoxim 1 ADAD289V50 ADAD28        | 209.57 | 28 | 28 | 28 | 8  | 19 | 26 | 29 | 22 | 16 | 9  | 18        | 2,02E+07 | 2,37E+07 | 1,98E+07 | 1,04E+06 | 5,84E+06 | 2,83E+07 | 3,10E+07 | 7,56E+06 | 2,09E+06 | 1,73E+06 | 6,49E+06 | 23 | 23  | 33  | 34  | 41  | 8   | 16  | 40  | 40  | 15  | 11         | 8          | 20         | Phosphoryl | 78838  |
| L1MAN2                        | Lamin A1 Q12907 L1MAN2_HUMAN         | 209.38 | 31 | 31 | 25 | 15 | 15 | 15 | 18 | 15 | 18 | 15 | 18        | 1,97E+06 | 1,97E+06 | 1,97E+06 | 3,13E+06 | 5,64E+06 | 1,74E+07 | 7,48E+06 | 8,41E+06 | 1,95E+07 | 1,54E+07 | 4,03E+07 | 35 | 35  | 29  | 29  | 32  | 15  | 22  | 32  | 45  | 33  | 33         | 8          | 32         | Phosphoryl | 40232  |
| APMAP                         | Adipocyte Q19H03 APMAP_HUMAN         | 209.27 | 33 | 38 | 39 | 10 | 17 | 37 | 40 | 34 | 21 | 26 | 40        | 3,05E+07 | 4,43E+07 | 5,22E+07 | 4,08E+06 | 1,31E+07 | 6,43E+07 | 6,78E+07 | 1,48E+07 | 9,43E+06 | 6,38E+06 | 2,05E+07 | 24 | 24  | 29  | 43  | 40  | 12  | 24  | 45  | 46  | 23  | 24         | 22         | 45         | Phosphoryl | 44480  |
| TRF1                          | Transferrin P02786 TRF1_HUMAN        | 209.2  | 26 | 28 | 38 | 18 | 22 | 27 | 27 | 16 | 14 | 25 | 29,93E+07 | 4,12E+07 | 3,87E+07 | 3,50E+06 | 1,65E+07 | 5,95E+07 | 1,65E+07 | 8,74E+06 | 5,24E+06 | 2,84E+07 | 31       | 30       | 48 | 52  | 15  | 32  | 46  | 65  | 29  | 26  | 20  | 43  | Phosphoryl | 84681      |            |            |        |
| UGDH                          | UDP-glucor 60701 UGDH_HUMAN          | 208.84 | 39 | 30 | 32 | 9  | 12 | 28 | 30 | 28 | 9  | 9  | 15        | 3,34E+07 | 5,08E+07 | 6,30E+07 | 3,01E+05 | 5,53E+06 | 5,81E+07 | 1,07E+08 | 3,66E+07 | 3,35E+06 | 1,57E+06 | 3,79E+06 | 25 | 25  | 44  | 41  | 46  | 4   | 12  | 52  | 62  | 44  | 8          | 5          | 12         | Phosphoryl | 55024  |
| HYB1                          | Thymoprosin 1 HYB1 HYB1_HUF          | 208.78 | 58 | 49 | 52 | 56 | 48 | 50 | 49 | 47 | 50 | 47 | 53        | 50       | 0        | 0        | 0        | 0        | 0        | 0        | 0        | 0        | 0        | 0        | 96 | 109 | 113 | 99  | 135 | 141 | 124 | 103 | 171 | 135 | 151        | Phosphoryl | 28747      |            |        |
| ESY1                          | Eukaryotic Q19518 ESY1_HUMAN         | 208.78 | 19 | 21 | 18 | 7  | 15 | 24 | 23 | 11 | 12 | 7  | 10        | 1,37E+07 | 2,93E+07 | 3,03E+07 | 3,72E+06 | 1,35E+07 | 5,43E+07 | 3,55E+07 | 9,36E+06 | 6,35E+06 | 3,78E+06 | 1,26E+07 | 27 | 19  | 39  | 42  | 37  | 13  | 34  | 64  | 50  | 27  | 15         | 17         | 33         | Phosphoryl | 123565 |
| GBP1                          | Ras GTPase Q13283 GBP1_HUMAN         | 208.13 | 26 | 27 | 28 | 3  | 3  | 36 | 28 | 0  | 3  | 0  | 0         | 1,96E+07 | 2,93E+07 | 3,03E+07 | 3,72E+06 | 1,35E+07 | 5,43E+07 | 3,55E+07 | 9,36E+06 | 6,35E+06 | 3,78E+06 | 1,26E+07 | 19 | 1   | 29  | 39  | 34  | 2   | 1   | 42  | 38  | 28  | 0          | 1          | 0          | Phosphoryl | 52164  |
| ODO2                          | Dihydrofolyl P36957 ODO2_HUMAN       | 207.96 | 28 | 27 | 23 | 23 | 20 | 29 | 30 | 25 | 26 | 26 | 29        | 2,73E+07 | 4,65E+07 | 2,89E+07 | 7,81E+06 | 2,54E+07 | 7,80E+07 | 5,24E+07 | 2,61E+07 | 2,30E+07 | 3,78E+07 | 4,05E+07 | 27 | 27  | 33  | 30  | 38  | 16  | 37  | 71  | 41  | 42  | 47         | 34         | 46         | Phosphoryl | 48755  |
| Ras GTPase 1 ADAD72V39 ADAD72 | Ras GTPase 1 ADAD72V39 ADAD72</      |        |    |    |    |    |    |    |    |    |    |    |           |          |          |          |          |          |          |          |          |          |          |          |    |     |     |     |     |     |     |     |     |     |            |            |            |            |        |







|             |                                       |        |    |    |    |    |    |    |    |    |    |    |           |           |          |          |          |          |          |          |          |          |          |          |    |    |    |    |    |    |    |    |    |    |            |            |            |            |        |
|-------------|---------------------------------------|--------|----|----|----|----|----|----|----|----|----|----|-----------|-----------|----------|----------|----------|----------|----------|----------|----------|----------|----------|----------|----|----|----|----|----|----|----|----|----|----|------------|------------|------------|------------|--------|
| H2AY        | Core histon O753671H2AY_HUMAN         | 178,17 | 33 | 37 | 28 | 0  | 9  | 34 | 23 | 25 | 0  | 0  | 0         | 1,51E+07  | 1,18E+07 | 8,12E+06 | 0        | 1,50E+07 | 8,81E+06 | 2,79E+06 | 0        | 14       | 12       | 22       | 20 | 17 | 0  | 3  | 22 | 20 | 14 | 0  | 0  | 0  | Deamidat   | 39617      |            |            |        |
| NC1M1       | Chloride in O002991NC1M1_HUMAN        | 178,13 | 36 | 45 | 41 | 10 | 29 | 47 | 47 | 47 | 29 | 29 | 29        | 2,91E+07  | 3,04E+07 | 2,86E+07 | 0        | 1,72E+06 | 1,28E+07 | 3,60E+07 | 1,24E+06 | 1,08E+06 | 2,60E+06 | 17       | 17 | 20 | 28 | 34 | 37 | 2  | 6  | 27 | 37 | 11 | 14         | 7          | 10         | Beta-meth  | 26923  |
| CLC1        | Neural cell P135991CLC1_HUMAN         | 178,04 | 13 | 9  | 10 | 5  | 10 | 9  | 8  | 5  | 10 | 7  | 13        | 1,30E+07  | 1,24E+07 | 1,37E+07 | 3,43E+06 | 1,17E+06 | 1,89E+07 | 1,91E+07 | 7,48E+06 | 9,32E+06 | 5,27E+06 | 2,07E+07 | 17 | 17 | 20 | 16 | 17 | 6  | 16 | 12 | 13 | 15 | 12         | 12         | 24         | Beta-meth  | 94574  |
| AD0A87W47K7 | Neural cell tr AD0A87W47K7 AD0A87     | 178,04 | 13 | 9  | 10 | 5  | 10 | 9  | 8  | 5  | 10 | 7  | 13        | 1,30E+07  | 1,24E+07 | 1,37E+07 | 3,43E+06 | 1,14E+06 | 1,89E+07 | 1,91E+07 | 7,48E+06 | 9,32E+06 | 5,27E+06 | 2,07E+07 | 17 | 17 | 20 | 16 | 17 | 6  | 16 | 12 | 13 | 15 | 12         | 12         | 24         | Beta-meth  | 94574  |
| AD0A87W575  | Neural cell tr AD0A87W575 AD0A87      | 178,04 | 13 | 9  | 10 | 5  | 10 | 9  | 8  | 5  | 10 | 7  | 13        | 1,30E+07  | 1,24E+07 | 1,37E+07 | 3,43E+06 | 1,14E+06 | 1,89E+07 | 1,91E+07 | 7,48E+06 | 9,32E+06 | 5,27E+06 | 2,07E+07 | 17 | 17 | 20 | 16 | 17 | 6  | 16 | 12 | 13 | 15 | 12         | 12         | 24         | Beta-meth  | 97314  |
| AD0A87W776  | Neural cell tr AD0A87W776 AD0A87      | 178,04 | 13 | 9  | 10 | 5  | 10 | 9  | 8  | 5  | 10 | 7  | 13        | 1,30E+07  | 1,24E+07 | 1,37E+07 | 3,43E+06 | 1,14E+06 | 1,89E+07 | 1,91E+07 | 7,48E+06 | 9,32E+06 | 5,27E+06 | 2,07E+07 | 17 | 17 | 20 | 16 | 17 | 6  | 16 | 12 | 13 | 15 | 12         | 12         | 24         | Beta-meth  | 97314  |
| AD0A87W9D4  | Neural cell tr AD0A87W9D4 AD0A87      | 178,04 | 13 | 9  | 10 | 5  | 9  | 8  | 8  | 5  | 9  | 6  | 8         | 1,30E+07  | 1,24E+07 | 1,37E+07 | 3,43E+06 | 1,14E+06 | 1,89E+07 | 1,91E+07 | 7,48E+06 | 9,32E+06 | 5,27E+06 | 2,07E+07 | 17 | 17 | 20 | 16 | 17 | 6  | 16 | 12 | 13 | 15 | 12         | 12         | 24         | Beta-meth  | 97345  |
| KHDR1       | KH domain Q07666 KHDR1_HUMAN          | 177,91 | 12 | 12 | 13 | 0  | 0  | 20 | 21 | 12 | 8  | 3  | 3         | 4,72E+07  | 5,07E+07 | 5,00E+07 | 2,10E+06 | 1,38E+07 | 7,24E+07 | 3,76E+07 | 4,00E+06 | 1,53E+06 | 6,29E+06 | 13       | 13 | 28 | 29 | 34 | 0  | 0  | 38 | 36 | 32 | 1  | 1          | 1          | Phosphoryl | 48227      |        |
| AD0A87H415  | Tripeptidyl tr AD0A87H415 AD0A87      | 177,91 | 16 | 20 | 16 | 14 | 14 | 20 | 16 | 14 | 14 | 14 | 20        | 1,65E+07  | 2,20E+07 | 1,57E+07 | 2,10E+06 | 8,74E+06 | 2,12E+07 | 1,85E+07 | 5,04E+06 | 4,00E+06 | 1,53E+06 | 1,38E+07 | 11 | 11 | 13 | 18 | 12 | 7  | 15 | 25 | 18 | 11 | 13         | 12         | 19         | Deamidat   | 61248  |
| TPP1        | Tripeptidyl O14773 TPP1_HUMAN         | 177,5  | 15 | 18 | 11 | 15 | 15 | 23 | 13 | 13 | 13 | 13 | 13        | 18,16E+06 | 2,20E+07 | 1,57E+07 | 2,10E+06 | 8,74E+06 | 2,12E+07 | 1,85E+07 | 5,04E+06 | 4,00E+06 | 1,53E+06 | 1,38E+07 | 11 | 11 | 13 | 18 | 12 | 7  | 15 | 25 | 18 | 11 | 13         | 12         | 19         | Deamidat   | 54263  |
| AD0A28B405  | Tripeptidyl tr AD0A28B405 AD0A28      | 177,5  | 17 | 21 | 21 | 12 | 17 | 26 | 21 | 17 | 15 | 13 | 14        | 21,16E+06 | 2,20E+07 | 1,57E+07 | 2,10E+06 | 8,74E+06 | 2,12E+07 | 1,85E+07 | 5,04E+06 | 4,00E+06 | 1,53E+06 | 1,38E+07 | 11 | 11 | 13 | 18 | 12 | 7  | 15 | 25 | 18 | 11 | 13         | 12         | 19         | Deamidat   | 54263  |
| AD0A28B401  | Tripeptidyl tr AD0A28B401 AD0A28      | 177,5  | 18 | 22 | 22 | 13 | 18 | 27 | 22 | 18 | 16 | 15 | 16        | 22,16E+06 | 2,20E+07 | 1,57E+07 | 2,10E+06 | 8,74E+06 | 2,12E+07 | 1,85E+07 | 5,04E+06 | 4,00E+06 | 1,53E+06 | 1,38E+07 | 11 | 11 | 13 | 18 | 12 | 7  | 15 | 25 | 18 | 11 | 13         | 12         | 19         | Deamidat   | 50890  |
| TRAP1       | Heat shock O12531 TRAP1_HUMAN         | 177,5  | 13 | 16 | 14 | 4  | 5  | 4  | 4  | 5  | 4  | 4  | 5         | 2,28E+06  | 3,98E+06 | 1,56E+06 | 2,19E+05 | 1,04E+06 | 4,17E+06 | 9,46E+05 | 4,93E+05 | 3,99E+05 | 1,39E+06 | 16       | 13 | 15 | 19 | 18 | 5  | 6  | 24 | 24 | 6  | 6  | 11         | Phosphoryl | 80110      |            |        |
| EPSPD0      | Splicing fac tr EPSPD0 EPSPD0_HUMAN   | 177,42 | 19 | 12 | 5  | 7  | 19 | 14 | 12 | 5  | 1  | 6  | 7         | 7,88E+06  | 1,43E+07 | 9,63E+06 | 4,38E+05 | 1,14E+06 | 2,12E+07 | 1,10E+07 | 5,04E+06 | 2,29E+05 | 0        | 1,25E+06 | 22 | 22 | 18 | 27 | 21 | 6  | 10 | 22 | 18 | 6  | 1          | 9          | Phosphoryl | 98170      |        |
| SF3B2       | Splicing fac Q13435 SF3B2_HUMAN       | 177,42 | 12 | 20 | 12 | 6  | 7  | 14 | 11 | 5  | 1  | 6  | 7         | 7,88E+06  | 1,47E+07 | 9,63E+06 | 2,01E+06 | 1,14E+06 | 2,12E+07 | 1,10E+07 | 5,04E+06 | 2,29E+05 | 0        | 1,25E+06 | 24 | 24 | 18 | 28 | 21 | 8  | 10 | 30 | 22 | 18 | 6          | 1          | 9          | Phosphoryl | 100228 |
| RS4X        | 40S ribosom P62701 RS4X_HUMAN         | 177,28 | 44 | 43 | 43 | 0  | 9  | 40 | 37 | 40 | 12 | 12 | 11        | 5,01E+07  | 9,61E+07 | 8,67E+07 | 1,83E+06 | 1,07E+08 | 1,51E+08 | 4,69E+07 | 1,08E+06 | 1,41E+06 | 1,32E+05 | 17       | 17 | 43 | 40 | 42 | 0  | 5  | 43 | 33 | 41 | 4  | 4          | 3          | Beta-meth  | 29598      |        |
| SF3B3       | Splicing fac Q13393 SF3B3_HUMAN       | 177,2  | 13 | 18 | 16 | 3  | 5  | 18 | 12 | 9  | 5  | 4  | 5         | 1,80E+07  | 1,51E+07 | 1,54E+07 | 7,51E+05 | 2,35E+06 | 3,02E+07 | 2,11E+07 | 1,04E+07 | 2,55E+06 | 1,35E+06 | 6,49E+06 | 28 | 28 | 28 | 34 | 6  | 9  | 35 | 30 | 21 | 13 | 5          | 13         | Phosphoryl | 135577     |        |
| ARF1        | ADP-ribosy P80077 ARF1_HUMAN          | 177,03 | 54 | 54 | 16 | 30 | 54 | 54 | 54 | 30 | 22 | 30 | 64,55E+06 | 9,26E+06  | 6,46E+06 | 0        | 4,56E+05 | 8,31E+06 | 1,57E+07 | 3,52E+06 | 9,78E+04 | 2,56E+05 | 0        | 1,72E+05 | 13 | 5  | 37 | 35 | 36 | 6  | 9  | 30 | 56 | 38 | 8          | 5          | 11         | Deamidat   | 20697  |
| ARF3        | ADP-ribosy P16204 ARF3_HUMAN          | 177,03 | 54 | 54 | 16 | 30 | 54 | 54 | 54 | 30 | 22 | 30 | 64,55E+06 | 9,26E+06  | 6,46E+06 | 0        | 4,56E+05 | 8,31E+06 | 1,57E+07 | 3,52E+06 | 9,78E+04 | 2,56E+05 | 0        | 1,72E+05 | 13 | 5  | 37 | 35 | 36 | 6  | 9  | 30 | 56 | 38 | 8          | 5          | 11         | Deamidat   | 20601  |
| IF2P        | Eukaryotic O60841 IF2P_HUMAN          | 176,94 | 9  | 11 | 9  | 2  | 1  | 12 | 17 | 12 | 1  | 1  | 0         | 3,83E+06  | 6,95E+06 | 5,01E+06 | 0        | 4,56E+05 | 8,31E+06 | 1,57E+07 | 3,52E+06 | 9,78E+04 | 2,56E+05 | 22       | 22 | 14 | 20 | 20 | 2  | 1  | 19 | 27 | 1  | 1  | 0          | Beta-meth  | 138827     |            |        |
| AD0A87WU76  | Eukaryotic tr AD0A87WU76 AD0A87       | 176,94 | 9  | 11 | 9  | 2  | 1  | 12 | 17 | 12 | 1  | 1  | 0         | 3,83E+06  | 6,95E+06 | 5,01E+06 | 0        | 4,56E+05 | 8,31E+06 | 1,57E+07 | 3,52E+06 | 9,78E+04 | 2,56E+05 | 22       | 22 | 14 | 20 | 20 | 2  | 1  | 19 | 27 | 1  | 1  | 0          | Beta-meth  | 138681     |            |        |
| SERA        | D-5-phosphat O43175 SERA_HUMAN        | 176,55 | 17 | 26 | 28 | 3  | 9  | 24 | 31 | 23 | 13 | 7  | 9         | 9,57E+06  | 2,55E+07 | 2,23E+07 | 1,61E+05 | 3,20E+06 | 1,85E+07 | 3,79E+07 | 9,90E+06 | 1,11E+06 | 9,93E+05 | 4,11E+06 | 21 | 20 | 16 | 32 | 38 | 2  | 10 | 25 | 33 | 19 | 12         | 7          | 12         | Beta-meth  | 56651  |
| AD0A28B222  | D-5-phosphat tr AD0A28B222 AD0A28     | 176,55 | 17 | 26 | 28 | 3  | 9  | 25 | 28 | 23 | 10 | 7  | 9         | 9,57E+06  | 2,55E+07 | 2,23E+07 | 1,61E+05 | 3,20E+06 | 1,85E+07 | 3,79E+07 | 9,90E+06 | 1,11E+06 | 9,93E+05 | 4,11E+06 | 19 | 18 | 16 | 32 | 38 | 2  | 10 | 25 | 32 | 19 | 11         | 7          | 12         | Beta-meth  | 55539  |
| ADGG        | Gamma-s ad Q9UEY6 ADGG_HUMAN          | 176,43 | 26 | 31 | 24 | 3  | 21 | 24 | 18 | 3  | 1  | 4  | 3,58E+07  | 3,67E+07  | 3,43E+07 | 5,79E+04 | 7,93E+05 | 4,49E+07 | 4,48E+07 | 2,11E+07 | 2,84E+05 | 0        | 1,30E+06 | 26       | 26 | 43 | 42 | 3  | 2  | 31 | 28 | 5  | 2  | 6  | Phosphoryl | 79155      |            |            |        |
| PDAS        | Protein dis Q14554 PDAS_HUMAN         | 176,4  | 19 | 15 | 3  | 0  | 22 | 18 | 16 | 5  | 3  | 0  | 5         | 5,20E+06  | 1,96E+07 | 1,44E+07 | 0        | 2,87E+07 | 2,43E+07 | 6,41E+06 | 3,00E+05 | 0        | 0        | 16       | 16 | 9  | 14 | 10 | 1  | 0  | 24 | 15 | 11 | 1  | 0          | 1          | Phosphoryl | 59594      |        |
| J3DTR3      | Ubiquitin-4 tr J3DTR3 J3DTR3_HUMAN    | 176,28 | 56 | 60 | 43 | 60 | 60 | 56 | 60 | 52 | 56 | 48 | 41,55E+07 | 8,45E+07  | 3,62E+07 | 1,34E+07 | 3,30E+07 | 9,02E+07 | 1,03E+08 | 2,99E+07 | 2,57E+07 | 1,03E+07 | 3,56E+07 | 12       | 12 | 40 | 43 | 48 | 21 | 42 | 45 | 52 | 42 | 33 | 22         | 35         | Phosphoryl | 12327      |        |
| UAD0        | Ubiquitin-4 P20587 UAD0_HUMAN         | 176,28 | 56 | 60 | 43 | 60 | 60 | 56 | 60 | 52 | 56 | 48 | 41,55E+07 | 8,45E+07  | 3,62E+07 | 1,34E+07 | 3,30E+07 | 9,02E+07 | 1,03E+08 | 2,99E+07 | 2,57E+07 | 1,03E+07 | 3,56E+07 | 12       | 12 | 40 | 43 | 48 | 21 | 42 | 45 | 52 | 42 | 33 | 22         | 36         | Beta-meth  | 14728      |        |
| J3D5J9      | Polysubiquitin tr J3D5J9 J3D5J9_HUMAN | 176,28 | 63 | 69 | 49 | 69 | 69 | 63 | 69 | 59 | 63 | 55 | 41,55E+07 | 8,45E+07  | 3,62E+07 | 1,34E+07 | 3,30E+07 | 9,02E+07 | 1,03E+08 | 2,99E+07 | 2,57E+07 | 1,03E+07 | 3,56E+07 | 19       | 12 | 40 | 43 | 48 | 21 | 42 | 45 | 52 | 42 | 33 | 22         | 35         | Phosphoryl | 13460      |        |
| F5HGQ2      | Polysubiquitin tr F5HGQ2 F5HGQ2_HUMAN | 176,28 | 68 | 69 | 49 | 69 | 69 | 63 | 69 | 59 | 63 | 55 | 41,55E+07 | 8,45E+07  | 3,62E+07 | 1,34E+07 | 3,30E+07 | 9,02E+07 | 1,03E+08 | 2,99E+07 | 2,57E+07 | 1,03E+07 | 3,56E+07 | 19       | 12 | 40 | 43 | 48 | 21 | 42 | 45 | 52 | 42 | 33 | 22         | 35         | Phosphoryl | 13732      |        |
| F5G9J3      | Polysubiquitin tr F5G9J3 F5G9J3_HUMAN | 176,28 | 44 | 48 | 34 | 48 | 48 | 46 | 48 | 41 | 44 | 38 | 41,55E+07 | 8,45E+07  | 3,62E+07 | 1,34E+07 | 3,30E+07 | 9,02E+07 | 1,03E+08 | 2,99E+07 | 2,57E+07 | 1,03E+07 | 3,56E+07 | 13       | 13 | 40 | 43 | 48 | 21 | 42 | 45 | 53 | 42 | 33 | 22         | 35         | Phosphoryl | 15032      |        |
| F5H2Z3      | Polysubiquitin tr F5H2Z3 F5H2Z3_HUMAN | 176,28 | 43 | 47 | 47 | 34 | 47 | 45 | 47 | 40 | 43 | 38 | 41,55E+07 | 8,45E+07  | 3,62E+07 | 1,34E+07 | 3,30E+07 | 9,02E+07 | 1,03E+08 |          |          |          |          |          |    |    |    |    |    |    |    |    |    |    |            |            |            |            |        |

|            |                                  |        |    |    |    |    |    |    |    |    |    |    |          |          |          |          |           |           |          |          |          |           |           |          |      |    |          |          |       |    |    |    |    |    |           |           |           |           |           |        |
|------------|----------------------------------|--------|----|----|----|----|----|----|----|----|----|----|----------|----------|----------|----------|-----------|-----------|----------|----------|----------|-----------|-----------|----------|------|----|----------|----------|-------|----|----|----|----|----|-----------|-----------|-----------|-----------|-----------|--------|
| AD1W2PR11  | HLA class I tr AD1W2PR11 A0A1    | 171.62 | 29 | 26 | 29 | 22 | 26 | 34 | 26 | 25 | 29 | 29 | 26       | 23       | 0        | 48       | 50        | 41        | 18       | 42       | 46       | 49        | 38        | 46       | 27   | 50 | Deamidat | 36849    |       |    |    |    |    |    |           |           |           |           |           |        |
| Q5Q373     | Cathepsin S tr Q5Q373 Q5Q373_H   | 171.62 | 26 | 23 | 26 | 19 | 23 | 30 | 23 | 22 | 26 | 25 | 23       | 23       | 14       | 0        | 48        | 50        | 41       | 18       | 42       | 46        | 49        | 38       | 46   | 27 | 50       | Deamidat | 40969 |    |    |    |    |    |           |           |           |           |           |        |
| EPSPQ5     | Cathepsin S tr EPSPQ5 EPSPQ5_HU  | 171.57 | 26 | 29 | 31 | 20 | 36 | 32 | 33 | 18 | 21 | 26 | 26       | 26       | 9,97E+05 | 1.16E+06 | 1.34E+06  | 2.48E+05  | 1.18E+06 | 1.97E+06 | 6.65E+05 | 1.09E+05  | 2.00      | 1        | 27   | 22 | 28       | 9        | 22    | 16 | 31 | 14 | 21 | 32 | Beta-meth | 32518     |           |           |           |        |
| AD172V429  | Collagen tr AD172V429 AD172      | 171.57 | 21 | 26 | 19 | 24 | 28 | 24 | 24 | 19 | 24 | 26 | 19       | 24       | 26       | 2,48E+05 | 1.18E+06  | 1.34E+06  | 2.48E+05 | 1.18E+06 | 1.97E+06 | 6.65E+05  | 1.09E+05  | 2.00     | 1    | 27 | 22       | 28       | 9     | 22 | 16 | 31 | 14 | 21 | 32        | Beta-meth | 25992     |           |           |        |
| SRPRA      | Signal rope P08240 SRPRA_HUMAN   | 171.51 | 14 | 21 | 12 | 0  | 0  | 21 | 18 | 16 | 0  | 4  | 1        | 6,17E+06 | 8,29E+06 | 7,01E+06 | 1.11E+07  | 1,69E+07  | 5,51E+06 | 2.15E+05 | 4,71E+05 | 1.55      | 15        | 13       | 17   | 14 | 0        | 0        | 17    | 21 | 15 | 0  | 2  | 2  | Deamidat  | 69811     |           |           |           |        |
| COA1       | Collagen alpha P39060 COA1_HUMAN | 171.45 | 11 | 7  | 1  | 4  | 0  | 2  | 4  | 3  | 2  | 2  | 0        | 4        | 3,22E+06 | 6,26E+06 | 1,28E+06  | 3,52E+05  | 3,24E+05 | 6,56E+06 | 5,33E+06 | 1,81E+05  | 0.239E+05 | 2.00     | 22   | 25 | 13       | 10       | 1     | 8  | 14 | 3  | 2  | 3  | 2         | 4         | Phosphory | 178187    |           |        |
| OAT        | Omithease P04181 OAT_HUMAN       | 171.31 | 21 | 21 | 23 | 3  | 15 | 25 | 13 | 15 | 10 | 15 | 10       | 20       | 1,83E+07 | 1,88E+07 | 2,20E+05  | 2,54E+07  | 3,26E+07 | 3,18E+07 | 7,14E+06 | 1,88E+06  | 5,55E+05  | 2,82E+06 | 1.55 | 15 | 12       | 28       | 5     | 16 | 35 | 40 | 22 | 13 | 7         | 14        | Phosphory | 48535     |           |        |
| SNAA       | Alpha-soluble P54920 SNAA_HUMAN  | 171.14 | 19 | 27 | 29 | 8  | 23 | 19 | 31 | 29 | 31 | 18 | 21       | 5,03E+06 | 1,26E+07 | 1,05E+07 | 4,73E+05  | 3,67E+06  | 1,54E+07 | 1,49E+07 | 5,97E+06 | 2,78E+06  | 6,88E+05  | 4,81E+06 | 1.55 | 15 | 12       | 21       | 16    | 2  | 16 | 20 | 28 | 15 | 16        | 6         | 17        | Beta-meth | 33233     |        |
| MB0R02     | Alpha-soluble tr MB0R02 MB0R02_H | 171.14 | 21 | 26 | 6  | 27 | 21 | 36 | 34 | 36 | 21 | 24 | 5,03E+06 | 1,26E+07 | 1,05E+07 | 4,73E+05 | 3,67E+06  | 1,54E+07  | 1,49E+07 | 5,97E+06 | 2,78E+06 | 6,88E+05  | 4,81E+06  | 1.55     | 15   | 12 | 21       | 16       | 2     | 16 | 20 | 28 | 15 | 16 | 6         | 17        | Beta-meth | 25163     |           |        |
| ETETKS     | Inosine-5'-tr ETETKS ETETKS_HU   | 171.11 | 24 | 33 | 28 | 0  | 5  | 28 | 29 | 24 | 9  | 8  | 14       | 6,89E+06 | 2,79E+07 | 1,05E+07 | 1,43E+05  | 1,13E+07  | 2,43E+07 | 7,24E+06 | 5,68E+04 | 0.385E+05 | 1.66      | 16       | 19   | 30 | 24       | 0        | 6     | 33 | 32 | 20 | 4  | 3  | 10        | Beta-meth | 53027     |           |           |        |
| AD172V2YK5 | Inosine-5'-tr AD172V2YK5 AD172   | 171.21 | 22 | 32 | 26 | 0  | 5  | 27 | 28 | 23 | 9  | 8  | 13       | 6,89E+06 | 2,79E+07 | 1,05E+07 | 1,43E+05  | 1,13E+07  | 2,43E+07 | 7,24E+06 | 5,68E+04 | 0.385E+05 | 1.66      | 16       | 19   | 30 | 24       | 0        | 6     | 33 | 32 | 20 | 4  | 3  | 10        | Beta-meth | 55567     |           |           |        |
| HY04H1     | Inosine-5'-tr HY04H1 HY04H1_HU   | 171.21 | 22 | 26 | 25 | 0  | 5  | 26 | 22 | 22 | 9  | 6  | 8        | 6,89E+06 | 1,60E+07 | 1,05E+07 | 1,43E+05  | 1,13E+07  | 2,43E+07 | 7,24E+06 | 5,68E+04 | 0.385E+05 | 1.66      | 15       | 15   | 19 | 29       | 24       | 0     | 6  | 33 | 32 | 20 | 4  | 2         | 9         | Beta-meth | 58345     |           |        |
| AD172V2Y73 | Inosine-5'-tr AD172V2Y73 AD172   | 171.21 | 22 | 27 | 26 | 0  | 5  | 26 | 22 | 23 | 9  | 6  | 9        | 6,89E+06 | 1,60E+07 | 1,05E+07 | 1,43E+05  | 1,13E+07  | 2,43E+07 | 7,24E+06 | 5,68E+04 | 0.385E+05 | 1.66      | 16       | 19   | 29 | 24       | 0        | 6     | 33 | 32 | 20 | 4  | 2  | 9         | Beta-meth | 55842     |           |           |        |
| AD172V2H3  | Inosine-5'-tr AD172V2H3 AD172    | 171.21 | 22 | 26 | 25 | 0  | 5  | 27 | 22 | 23 | 9  | 6  | 9        | 6,89E+06 | 1,60E+07 | 1,05E+07 | 1,43E+05  | 1,13E+07  | 2,43E+07 | 7,24E+06 | 5,68E+04 | 0.385E+05 | 1.66      | 15       | 15   | 19 | 29       | 24       | 0     | 6  | 33 | 32 | 20 | 4  | 2         | 9         | Beta-meth | 55805     |           |        |
| AATM       | Aspartate P00505 AATM_HUMAN      | 170.94 | 29 | 29 | 30 | 14 | 31 | 31 | 27 | 21 | 25 | 26 | 27       | 2,85E+07 | 1,90E+07 | 3,12E+07 | 1,30E+06  | 1,94E+07  | 2,89E+07 | 2,69E+07 | 1,40E+07 | 9,20E+06  | 1,01E+07  | 3,53E+07 | 21   | 21 | 26       | 19       | 8     | 27 | 24 | 25 | 16 | 22 | 25        | 34        | Beta-meth | 47518     |           |        |
| KAD2       | Adenylate P54819 KAD2_HUMAN      | 170.68 | 49 | 44 | 47 | 0  | 36 | 49 | 44 | 36 | 20 | 9  | 49       | 2,64E+07 | 2,79E+07 | 2,81E+07 | 3.00E+06  | 2,74E+06  | 3,80E+07 | 3,49E+07 | 1,51E+07 | 1,88E+06  | 4,82E+05  | 8,20E+06 | 16   | 16 | 27       | 27       | 29    | 0  | 8  | 29 | 29 | 19 | 7         | 26        | Phosphory | 26478     |           |        |
| FBW1A4     | Adenylate tr FBW1A4 FBW1A4_H     | 170.68 | 50 | 45 | 48 | 0  | 38 | 50 | 45 | 37 | 21 | 9  | 50       | 2,64E+07 | 2,79E+07 | 2,81E+07 | 3.00E+06  | 2,74E+06  | 3,80E+07 | 3,49E+07 | 1,51E+07 | 1,88E+06  | 4,82E+05  | 8,20E+06 | 16   | 16 | 27       | 27       | 29    | 0  | 8  | 29 | 29 | 19 | 7         | 26        | Phosphory | 25631     |           |        |
| ETFB       | Ecton tr P38117 ETFB_HUMAN       | 170.49 | 37 | 36 | 24 | 32 | 27 | 33 | 27 | 33 | 27 | 33 | 35       | 7,45E+06 | 4,32E+07 | 1,75E+07 | 6,00E+06  | 1,90E+07  | 5,45E+07 | 3,78E+07 | 1,40E+07 | 1,08E+07  | 6,61E+06  | 2,48E+07 | 21   | 21 | 30       | 49       | 48    | 14 | 33 | 43 | 30 | 19 | 16        | 44        | Phosphory | 27844     |           |        |
| CATA       | Catalase O P04040 CATA_HUMAN     | 170.38 | 20 | 20 | 13 | 24 | 0  | 27 | 20 | 12 | 20 | 5  | 33       | 6,44E+05 | 7,01E+06 | 4,66E+06 | 1,53E+05  | 1,05E+06  | 2,04E+06 | 1,00E+07 | 2,97E+06 | 4,27E+05  | 7,45E+05  | 0.21     | 11   | 12 | 21       | 3        | 5     | 17 | 31 | 19 | 1  | 3  | 4         | Beta-meth | 66500     |           |           |        |
| CE170      | Centrosom Q55W79 CE170_HUMA      | 170.18 | 7  | 5  | 13 | 1  | 1  | 10 | 10 | 3  | 0  | 1  | 1        | 2,15E+06 | 1,86E+06 | 2,31E+06 | 1,58E+06  | 0.158E+07 | 1,00E+07 | 3,43E+06 | 1,48E+05 | 0.910E+04 | 2.00      | 29       | 29   | 13 | 10       | 20       | 2     | 1  | 20 | 18 | 6  | 1  | 1         | Phosphory | 175292    |           |           |        |
| ARF4       | ADP-ribosy P18085 ARF4_HUMAN     | 170.14 | 43 | 48 | 56 | 22 | 32 | 56 | 47 | 26 | 26 | 32 | 32       | 1,02E+07 | 2,34E+07 | 2,31E+07 | 0.132E+08 | 2,39E+07  | 4,34E+07 | 1,56E+07 | 7,45E+05 | 9,72E+05  | 1,67E+06  | 1.00     | 5    | 35 | 42       | 43       | 8     | 10 | 38 | 57 | 33 | 6  | 8         | 4         | Deamidat  | 20511     |           |        |
| AD172V4V7  | Polyadenyl tr AD172V4V7 AD172    | 170.08 | 15 | 23 | 17 | 9  | 7  | 17 | 24 | 17 | 2  | 2  | 7        | 6,44E+05 | 7,01E+06 | 4,66E+06 | 1,53E+05  | 1,05E+06  | 2,04E+06 | 1,00E+07 | 2,97E+06 | 4,27E+05  | 7,45E+05  | 0.21     | 11   | 12 | 21       | 3        | 5     | 17 | 31 | 19 | 1  | 3  | 4         | Beta-meth | 66500     |           |           |        |
| PARP4      | Poly(ADP-ribose) P0484_HUMAN     | 170.08 | 44 | 22 | 16 | 9  | 6  | 16 | 22 | 16 | 2  | 2  | 6        | 6,44E+05 | 7,01E+06 | 4,66E+06 | 1,53E+05  | 1,05E+06  | 2,04E+06 | 1,00E+07 | 2,97E+06 | 4,27E+05  | 7,45E+05  | 0.21     | 11   | 12 | 21       | 3        | 5     | 17 | 31 | 19 | 1  | 3  | 4         | Beta-meth | 70783     |           |           |        |
| FAS        | Fatty acid P49327 FAS_HUMAN      | 170.03 | 3  | 7  | 10 | 0  | 1  | 6  | 12 | 5  | 0  | 0  | 2        | 7        | 4,04E+06 | 1,39E+07 | 8,17E+06  | 2,06E+06  | 1,05E+06 | 4,05E+06 | 1,88E+07 | 1,22E+06  | 4.75E+06  | 2.00     | 28   | 28 | 10       | 23       | 34    | 0  | 1  | 22 | 34 | 14 | 0         | 0         | 4         | Phosphory | 273424    |        |
| AT2A1      | Sarcoplasm O14983 AT2A1_HUMAI    | 169.91 | 10 | 13 | 9  | 7  | 13 | 12 | 8  | 12 | 8  | 12 | 8        | 14       | 1,41E+06 | 3,89E+06 | 1,49E+06  | 0.216E+07 | 2,31E+06 | 2,89E+05 | 7,57E+04 | 7,24E+05  | 2.00      | 5        | 16   | 24 | 16       | 8        | 17    | 27 | 26 | 11 | 11 | 10 | 28        | Phosphory | 110252    |           |           |        |
| MA2B1      | Lycoposol O00754 MA2B1_HUMF      | 169.72 | 9  | 12 | 16 | 3  | 14 | 10 | 8  | 4  | 9  | 12 | 5        | 3,96E+06 | 7,95E+06 | 1,19E+07 | 6,38E+05  | 4,85E+06  | 1,88E+07 | 1,12E+07 | 5,35E+06 | 2,79E+06  | 2,16E+06  | 7,67E+06 | 22   | 22 | 32       | 22       | 12    | 15 | 23 | 6  | 13 | 24 | 11        | 12        | 10        | 22        | Phosphory | 113744 |
| AD172V4V2  | Sec1 family tr AD172V4V2 AD172   | 169.69 | 29 | 22 | 3  | 13 | 20 | 23 | 16 | 6  | 6  | 6  | 9        | 2,94E+06 | 1,82E+06 | 1,32E+06 | 1,06E+06  | 1,37E+06  | 2,81E+06 | 1,28E+06 | 1,28E+06 | 4,52E+05  | 2,60E+05  | 2.00     | 26   | 26 | 20       | 31       | 28    | 6  | 8  | 23 | 40 | 3  | 5         | Deamidat  | 69648     |           |           |        |
| AD172V2V52 | Sec1 family tr AD172V2V52 AD172  | 169.69 | 23 | 28 | 22 | 3  | 12 | 20 | 22 | 15 | 8  | 6  | 13       | 5,34E+06 | 6,54E+06 | 6,66E+06 | 0.351E+07 | 9,87E+06  | 1,40E+07 | 2,83E+06 | 6,11E+04 | 2,46E+05  | 6,25E+05  | 1.88     | 18   | 26 | 22       | 27       | 1     | 9  | 23 | 27 | 13 | 4  | 3         | 11        | Beta-meth | 68960     |           |        |
| SCFD1      | Sec1 family Q8VWV8 SCFD1_HUM     | 169.69 | 22 | 27 | 6  | 13 | 19 | 21 | 14 | 7  | 6  | 12 | 5        | 3,34E+06 | 6,54E+06 | 6,66E+06 | 0.351E+07 | 9,87E+06  | 1,40E+07 | 2,83E+06 | 6,11E+04 | 2,46E+05  | 6,25E+05  | 1.88     | 18   | 26 | 22       | 27       | 1     | 9  | 23 | 27 | 13 | 4  | 3         | 11        | Beta-meth | 72380     |           |        |
| AD172V3B4  | Sec1 family tr AD172V3B4 AD172   | 169.69 | 23 | 28 | 21 | 3  | 13 | 20 | 22 | 15 | 8  | 6  | 13       | 5,34E+06 | 6,54E+06 | 6,66E+06 | 0.351E+07 | 9,87E+06  | 1,40E+07 | 2,83E+06 | 6,11E+04 | 2,46E+05  | 6,25E+05  | 1.88     | 17   | 26 | 22       | 26       | 1     | 9  | 23 | 27 | 13 | 4  | 3         | 11        | Beta-meth | 69923     |           |        |
| AD172V4B8  | Sec1 family tr AD172V4B8 AD172   | 169.69 | 24 | 28 | 23 | 3  | 13 | 20 | 23 | 15 | 8  | 6  | 13       | 5,34E+06 | 6,54E+06 | 6,66E+06 | 0.351E+07 | 9,87E+06  | 1,40E+07 | 2,83E+06 | 6,11E+04 | 2,46E+05  | 6,25E+05  | 1.88     | 17   | 26 | 21       | 27       | 1     | 9  | 23 | 27 | 13 | 4  | 3         | 11        | Beta-meth | 66421     |           |        |
| UGPA       | RNA-soluble P18311 UGPA_HUMAN    | 169.62 | 22 | 21 | 36 | 1  | 12 | 18 | 16 | 6  | 5  | 9  | 7        | 2,94E+06 | 1,82E+06 | 1,32E+06 | 1,06E+06  | 1,37E+06  | 2,81E+06 | 1,28E+06 | 1,28E+06 | 4,52E+05  | 2,60E+05  | 2.00     | 26   | 26 | 20       | 31       | 28    | 6  | 8  | 23 | 40 | 3  |           |           |           |           |           |        |

|            |                                                         |        |    |    |    |    |    |    |    |    |    |    |    |          |          |          |          |          |          |          |          |          |          |          |          |          |    |    |    |    |    |    |    |    |    |    |          |            |            |            |           |        |    |
|------------|---------------------------------------------------------|--------|----|----|----|----|----|----|----|----|----|----|----|----------|----------|----------|----------|----------|----------|----------|----------|----------|----------|----------|----------|----------|----|----|----|----|----|----|----|----|----|----|----------|------------|------------|------------|-----------|--------|----|
| LYRC       | Protein LYP Q86UE4 LYRC_HUMAN                           | 163.6  | 20 | 21 | 17 | 4  | 7  | 30 | 26 | 18 | 11 | 6  | 4  | 1.39E+07 | 1.50E+07 | 1.36E+07 | 1.44E+06 | 3.51E+05 | 2.90E+07 | 2.23E+07 | 8.32E+06 | 2.63E+06 | 1.84E+06 | 3.34E+06 | 20       | 20       | 27 | 24 | 28 | 2  | 2  | 36 | 31 | 20 | 4  | 3  | 1        | Phosphoryl | 63837      |            |           |        |    |
| QDR        | Glucocorticoid receptor QDR257_HUMAN                    | 163.3  | 26 | 37 | 25 | 3  | 26 | 29 | 16 | 19 | 29 | 16 | 19 | 29       | 15E+06   | 1.34E+07 | 1.09E+07 | 0        | 4.07E+06 | 1.27E+07 | 9.45E+06 | 3.80E+06 | 1.14E+06 | 1.72E+06 | 0        | 25       | 22 | 20 | 28 | 20 | 0  | 0  | 18 | 32 | 10 | 2  | 0        | 1          | Beta-meth  | 96696      |           |        |    |
| PGB        | Quinone P11216 PGB_HUMAN                                | 163.22 | 16 | 19 | 15 | 0  | 0  | 8  | 18 | 8  | 3  | 0  | 1  | 4.46E+06 | 1.39E+07 | 1.28E+07 | 0        | 6.62E+06 | 1.99E+07 | 5.50E+06 | 1.14E+06 | 8.47E+05 | 0        | 0        | 25       | 22       | 20 | 28 | 20 | 0  | 0  | 18 | 32 | 10 | 2  | 0  | 1        | Beta-meth  | 96696      |            |           |        |    |
| CD128B     | ADP-ribosyltransferase CD128B_HUMAN                     | 163.19 | 51 | 46 | 19 | 12 | 2  | 26 | 19 | 26 | 26 | 26 | 26 | 0        | 4.21E+06 | 9.83E+06 | 1.08E+07 | 0        | 1.34E+07 | 3.48E+07 | 5.02E+06 | 2.41E+05 | 0        | 0        | 25       | 22       | 20 | 28 | 20 | 0  | 0  | 18 | 32 | 10 | 2  | 0  | 1        | Beta-meth  | 115041     |            |           |        |    |
| AFB5       | ADP-ribosyltransferase AFB5_HUMAN                       | 163.19 | 44 | 40 | 39 | 16 | 22 | 39 | 47 | 33 | 22 | 22 | 22 | 0        | 0        | 0        | 0        | 0        | 2.64E+05 | 0        | 0        | 0        | 0        | 0        | 0        | 2        | 2  | 29 | 29 | 27 | 6  | 8  | 22 | 42 | 27 | 7  | 5        | 9          | Phosphoryl | 20530      |           |        |    |
| FKBP9      | Peptidyl-prolyl isomerase FKBP9_HUMAN                   | 163.15 | 18 | 22 | 19 | 16 | 19 | 20 | 18 | 17 | 20 | 20 | 20 | 20       | 3.20E+07 | 4.24E+07 | 3.45E+07 | 3.29E+06 | 2.18E+07 | 5.67E+07 | 5.18E+07 | 2.02E+07 | 1.40E+07 | 7.73E+06 | 3.28E+07 | 22       | 20 | 42 | 52 | 41 | 20 | 51 | 52 | 47 | 40 | 43 | 30       | 58         | Deamidat   | 63084      |           |        |    |
| MANF       | Mesencephalic basic fibroblast growth factor MANF_HUMAN | 162.84 | 26 | 32 | 24 | 0  | 0  | 4  | 32 | 24 | 0  | 0  | 1  | 9.17E+07 | 2.42E+07 | 2.39E+07 | 0        | 7.01E+06 | 2.52E+07 | 5.19E+07 | 1.51E+07 | 8.61E+05 | 2.68E+05 | 2.62E+06 | 0        | 10       | 10 | 32 | 27 | 0  | 1  | 35 | 31 | 32 | 0  | 0  | 2        | Beta-meth  | 20700      |            |           |        |    |
| RA1E1      | Anticardiolipin phospholipase A2 RA1E1_HUMAN            | 162.66 | 13 | 15 | 16 | 1  | 4  | 21 | 16 | 9  | 4  | 1  | 1  | 7        | 7.61E+06 | 1.16E+07 | 9.88E+06 | 0        | 1.19E+06 | 2.25E+07 | 4.07E+07 | 1.37E+07 | 8.45E+05 | 2.68E+05 | 2.62E+06 | 35       | 35 | 20 | 26 | 18 | 1  | 5  | 37 | 23 | 13 | 7  | 1        | 4          | Beta-meth  | 115041     |           |        |    |
| UACA       | Urokinase-type plasminogen activator UACA_HUMAN         | 162.52 | 6  | 13 | 2  | 0  | 0  | 13 | 7  | 0  | 0  | 0  | 0  | 0        | 0        | 0        | 0        | 0        | 0        | 1.34E+07 | 2.48E+07 | 2.41E+05 | 0        | 0        | 0        | 13       | 7  | 0  | 0  | 0  | 0  | 0  | 0  | 0  | 0  | 0  | 0        | 0          | 0          | 0          | Beta-meth | 162504 |    |
| RL4        | 60S ribosomal protein L4_RL4_HUMAN                      | 162.52 | 20 | 20 | 27 | 7  | 11 | 20 | 26 | 20 | 11 | 15 | 15 | 15       | 14       | 3.99E+07 | 4.17E+07 | 5.72E+07 | 1.41E+06 | 3.57E+06 | 5.94E+07 | 1.17E+08 | 2.76E+07 | 3.41E+06 | 5.92E+05 | 1.6E+06  | 16 | 16 | 30 | 32 | 38 | 8  | 12 | 36 | 50 | 26 | 8        | 7          | 16         | Beta-meth  | 47467     |        |    |
| SYLC       | Leucine--tRNA synthetase SYLC_HUMAN                     | 162.45 | 7  | 6  | 11 | 1  | 4  | 2  | 1  | 2  | 1  | 2  | 1  | 2        | 1.81E+06 | 4.41E+06 | 8.79E+06 | 0        | 2.95E+05 | 6.68E+06 | 1.66E+07 | 2.27E+06 | 0        | 0        | 0        | 1.61E+05 | 20 | 20 | 8  | 8  | 17 | 2  | 3  | 8  | 21 | 7  | 2        | 1          | 2          | Phosphoryl | 134338    |        |    |
| ADABP87V1  | Leucyl-tRNA synthetase ADABP87V1_HUMAN                  | 162.45 | 7  | 6  | 11 | 1  | 4  | 5  | 12 | 4  | 2  | 1  | 2  | 2        | 1.81E+06 | 4.41E+06 | 8.79E+06 | 0        | 2.95E+05 | 6.68E+06 | 1.66E+07 | 2.27E+06 | 0        | 0        | 0        | 1.61E+05 | 20 | 20 | 8  | 8  | 17 | 2  | 3  | 8  | 21 | 7  | 2        | 1          | 2          | Phosphoryl | 134338    |        |    |
| ADABP87D   | Leucyl-tRNA synthetase ADABP87D_HUMAN                   | 162.45 | 7  | 6  | 11 | 1  | 4  | 5  | 12 | 4  | 2  | 1  | 2  | 2        | 1.81E+06 | 4.41E+06 | 8.79E+06 | 0        | 2.95E+05 | 6.68E+06 | 1.66E+07 | 2.27E+06 | 0        | 0        | 0        | 1.61E+05 | 20 | 20 | 8  | 8  | 17 | 2  | 3  | 8  | 21 | 7  | 2        | 1          | 2          | Phosphoryl | 134338    |        |    |
| ATP5B      | ATP synthase subunit 5 ATP5B_HUMAN                      | 162.42 | 45 | 34 | 45 | 27 | 34 | 45 | 34 | 34 | 45 | 34 | 45 | 34       | 34       | 2.81E+07 | 4.57E+07 | 3.80E+07 | 1.22E+07 | 2.48E+07 | 6.54E+07 | 2.09E+07 | 2.26E+07 | 1.29E+07 | 4.08E+07 | 14       | 14 | 26 | 19 | 30 | 14 | 24 | 33 | 27 | 21 | 23 | 22       | 28         | Deamidat   | 17490      |           |        |    |
| LEG1       | Galectin-1 P09382 LEG1_HUMAN                            | 162.4  | 54 | 48 | 38 | 41 | 48 | 65 | 48 | 33 | 33 | 33 | 33 | 33       | 1.13E+08 | 2.74E+08 | 3.07E+08 | 1.52E+07 | 3.28E+07 | 1.54E+08 | 2.20E+08 | 1.26E+08 | 4.76E+07 | 2.91E+07 | 5.16E+07 | 23       | 23 | 31 | 43 | 16 | 23 | 34 | 43 | 44 | 31 | 27 | 27       | 27         | Beta-meth  | 14716      |           |        |    |
| COPA       | Coatomer 1 P35621 COPA_HUMAN                            | 162.39 | 9  | 13 | 11 | 1  | 2  | 12 | 19 | 13 | 2  | 3  | 2  | 1.96E+06 | 1.11E+07 | 4.87E+06 | 1.34E+05 | 1.23E+05 | 9.91E+06 | 2.85E+07 | 5.60E+06 | 9.20E+04 | 1.42E+05 | 8.17E+05 | 0        | 20       | 30 | 14 | 27 | 19 | 1  | 3  | 21 | 43 | 22 | 3  | 3        | 4          | Beta-meth  | 13845      |           |        |    |
| ADAB3BT15  | Coatomer 1 P35621 ADAB3BT15_HUMAN                       | 162.39 | 9  | 13 | 11 | 1  | 2  | 12 | 19 | 13 | 2  | 3  | 2  | 1.96E+06 | 1.11E+07 | 4.87E+06 | 1.34E+05 | 1.23E+05 | 9.91E+06 | 2.85E+07 | 5.60E+06 | 9.20E+04 | 1.42E+05 | 8.17E+05 | 0        | 20       | 30 | 14 | 27 | 19 | 1  | 3  | 21 | 43 | 22 | 3  | 3        | 4          | Beta-meth  | 130220     |           |        |    |
| ADAB3BT29  | Thyroid hormone receptor beta ADAB3BT29_HUMAN           | 162.29 | 18 | 15 | 16 | 5  | 8  | 20 | 16 | 15 | 7  | 6  | 7  | 7        | 3.34E+07 | 2.89E+07 | 3.28E+07 | 1.03E+06 | 3.19E+06 | 5.04E+07 | 4.73E+07 | 2.91E+07 | 3.38E+06 | 1.59E+06 | 3.63E+06 | 19       | 19 | 33 | 29 | 31 | 7  | 11 | 41 | 42 | 26 | 15 | 5        | 10         | Phosphoryl | 103523     |           |        |    |
| TR150      | Thyroid hormone receptor alpha TR150_HUMAN              | 162.29 | 18 | 14 | 15 | 5  | 7  | 19 | 15 | 14 | 7  | 6  | 7  | 7        | 3.34E+07 | 2.89E+07 | 3.28E+07 | 1.03E+06 | 3.19E+06 | 5.04E+07 | 4.73E+07 | 2.91E+07 | 3.38E+06 | 1.59E+06 | 3.63E+06 | 19       | 19 | 33 | 29 | 31 | 7  | 11 | 41 | 42 | 26 | 15 | 5        | 10         | Phosphoryl | 108666     |           |        |    |
| K7EN4      | ATP synthase subunit 4 K7EN4_HUMAN                      | 162.21 | 29 | 40 | 43 | 28 | 41 | 36 | 40 | 36 | 30 | 36 | 43 | 43       | 2.23E+05 | 1.04E+05 | 0        | 2.80E+05 | 2.80E+05 | 6.36E+04 | 0        | 0        | 0        | 0        | 0        | 27       | 2  | 36 | 40 | 41 | 27 | 53 | 35 | 42 | 33 | 39 | 43       | 51         | Phosphoryl | 21339      |           |        |    |
| DHB12      | Very-long-chain fatty acid desaturase DHB12_HUMAN       | 162.16 | 30 | 28 | 28 | 16 | 24 | 30 | 24 | 16 | 15 | 28 | 32 | 1.93E+07 | 2.35E+07 | 1.87E+07 | 2.01E+06 | 7.32E+06 | 2.89E+07 | 3.08E+07 | 6.67E+06 | 6.08E+05 | 1.55E+06 | 8.67E+06 | 0        | 20       | 20 | 18 | 24 | 19 | 7  | 18 | 23 | 16 | 12 | 7  | 9        | 17         | Beta-meth  | 34324      |           |        |    |
| 143G6      | 14-3-3 protein P02581 143G6_HUMAN                       | 162.07 | 20 | 35 | 28 | 8  | 20 | 32 | 29 | 36 | 32 | 17 | 29 | 1.40E+07 | 3.03E+07 | 2.58E+07 | 0        | 6.17E+06 | 5.57E+07 | 4.61E+07 | 1.73E+07 | 6.33E+06 | 4.10E+06 | 9.69E+06 | 12       | 7        | 36 | 47 | 38 | 4  | 19 | 42 | 45 | 39 | 26 | 13 | 2        | 2          | Beta-meth  | 28303      |           |        |    |
| QZB64      | Hsp70 family class B member QZB64_HUMAN                 | 162.02 | 19 | 15 | 17 | 20 | 19 | 15 | 19 | 14 | 15 | 19 | 14 | 15       | 19       | 2.67E+07 | 1.67E+07 | 2.16E+07 | 3.20E+06 | 6.37E+06 | 3.90E+07 | 2.91E+07 | 1.16E+07 | 6.53E+06 | 6.28E+06 | 9.85E+06 | 13 | 2  | 21 | 12 | 13 | 17 | 13 | 17 | 14 | 18 | Deamidat | 23412      |            |            |           |        |    |
| TCPI       | T-complex core protein TCPI_HUMAN                       | 161.78 | 21 | 17 | 0  | 3  | 20 | 17 | 6  | 7  | 3  | 4  | 11 | 6        | 4.22E+06 | 1.26E+07 | 1.60E+07 | 0        | 3.11E+06 | 2.83E+07 | 1.60E+07 | 0        | 0        | 0        | 0        | 0        | 19 | 19 | 17 | 24 | 21 | 0  | 1  | 27 | 26 | 21 | 2        | 2          | 2          | Beta-meth  | 59367     |        |    |
| PR56B      | 26S proteasome PR56B_HUMAN                              | 161.65 | 21 | 23 | 23 | 5  | 4  | 20 | 22 | 20 | 4  | 4  | 4  | 4        | 4.22E+06 | 1.26E+07 | 1.60E+07 | 0        | 3.11E+06 | 2.83E+07 | 1.60E+07 | 0        | 0        | 0        | 0        | 0        | 12 | 12 | 12 | 17 | 17 | 1  | 1  | 20 | 22 | 11 | 4        | 3          | 2          | Beta-meth  | 47366     |        |    |
| PGAM1      | Phosphoglucomutase PGAM1_HUMAN                          | 161.61 | 30 | 41 | 43 | 8  | 27 | 41 | 41 | 41 | 13 | 4  | 13 | 3.56E+07 | 3.79E+07 | 7.62E+07 | 5.48E+05 | 1.93E+06 | 1.14E+07 | 8.11E+07 | 4.57E+07 | 7.57E+06 | 0        | 0        | 4.13E+06 | 10       | 8  | 15 | 24 | 26 | 1  | 6  | 17 | 34 | 29 | 3  | 1        | 2          | Beta-meth  | 28804      |           |        |    |
| Q32E12     | Nucleoside diphosphate kinase 2 Q32E12_HUMAN            | 161.62 | 32 | 37 | 29 | 22 | 23 | 28 | 28 | 28 | 28 | 28 | 28 | 28       | 2.67E+07 | 3.78E+07 | 2.81E+07 | 1.55E+06 | 6.17E+06 | 1.69E+07 | 4.03E+07 | 7.95E+06 | 3.69E+06 | 2.74E+06 | 0        | 25       | 25 | 25 | 25 | 25 | 25 | 25 | 25 | 25 | 25 | 25 | 25       | 25         | 25         | 25         | 25        | 25     | 25 |
| RAP1A      | Ras-related protein RAP1A_HUMAN                         | 161.06 | 57 | 61 | 61 | 20 | 48 | 56 | 58 | 55 | 32 | 34 | 61 | 3.01E+06 | 1.06E+07 | 8.81E+06 | 0        | 2.80E+06 | 0        | 0        | 1.23E+05 | 3.35E+06 | 6.56E+05 | 8.24E+05 | 1.96E+06 | 21       | 2  | 23 | 32 | 25 | 8  | 20 | 27 | 42 | 22 | 13 | 17       | 35         | Beta-meth  | 20987      |           |        |    |
| ADAD87WUK2 | Ras-related protein ADAD87WUK2 ADAD87_HUMAN             | 160.68 | 20 | 22 | 15 | 0  | 9  | 23 | 26 | 24 | 0  | 0  | 0  | 1.43E+07 | 2.46E+07 | 1.95E+07 | 0        | 0        | 0        | 0        | 3.17E+07 | 3.15E+07 | 1.40E+07 | 0        | 0        | 16       | 14 | 15 | 21 | 23 | 0  | 2  | 18 | 22 | 0  | 0  | 0        | 0          | 0          | Beta-meth  | 40040     |        |    |
| HNRDL      | Hydroxymethyltransferase HNRDL_HUMAN                    | 160.68 | 17 | 19 | 13 | 0  | 8  | 20 | 23 | 20 | 0  | 0  | 0  | 1.43E+07 | 2.46E+07 | 1.95E+07 | 0        | 0        | 0        | 0        | 3.17E+07 | 3.15E+07 | 1.40E+07 | 0        | 0        | 16       | 14 | 15 | 21 | 23 | 0  | 2  | 18 | 22 | 0  | 0  | 0        | 0          | 0          | Beta-meth  | 46438     |        |    |
| PGRC1      | Membrane protein PGRC1_HUMAN                            | 160.63 | 37 | 37 | 29 | 19 | 37 | 37 | 36 | 29 | 30 | 27 | 37 | 1.47E+07 | 2.27E+07 | 1.99E+07 | 5.52E+06 | 1.15E+07 | 3.72E+07 | 3.04E+07 | 1.10E+07 | 1.15E+07 | 1.15E+07 | 5.50E+06 | 2.05E+07 | 9        | 9  | 21 | 21 | 15 | 9  | 16 | 26 |    |    |    |          |            |            |            |           |        |    |

|           |                                         |        |    |    |    |    |    |    |    |    |    |    |          |          |          |          |          |          |          |          |          |          |          |          |    |    |    |    |     |             |          |       |             |       |    |             |             |             |             |        |
|-----------|-----------------------------------------|--------|----|----|----|----|----|----|----|----|----|----|----------|----------|----------|----------|----------|----------|----------|----------|----------|----------|----------|----------|----|----|----|----|-----|-------------|----------|-------|-------------|-------|----|-------------|-------------|-------------|-------------|--------|
| AT1A2     | Sodium/p50993 AT1A2_HUMAN               | 153.98 | 7  | 6  | 5  | 5  | 9  | 8  | 7  | 4  | 7  | 3  | 6        | 0        | 4.99E-04 | 0        | 19       | 3        | 17       | 20       | 16       | 9        | 19       | 20       | 18 | 16 | 13 | 8  | 19  | Phosphoryl  | 112265   |       |             |       |    |             |             |             |             |        |
| NDCA      | Nucleoside P15531 NDCA_HUMAN            | 153.68 | 40 | 51 | 45 | 40 | 40 | 45 | 45 | 39 | 40 | 3  | 6        | 0        | 2.39E+07 | 2.39E+07 | 15       | 2        | 24       | 25       | 28       | 9        | 17       | 24       | 27 | 28 | 15 | 13 | 14  | Beta-methyl | 972451   |       |             |       |    |             |             |             |             |        |
| CDK5      | Cell division P09459 CDK5_HUMAN         | 153.63 | 14 | 14 | 10 | 1  | 2  | 17 | 10 | 8  | 2  | 2  | 1        | 0        | 1.89E+06 | 1.88E+06 | 4,14E+05 | 0        | 19       | 57       | 11       | 9        | 1        | 17       | 9  | 6  | 2  | 1  | 8   | Beta-methyl | 192159   |       |             |       |    |             |             |             |             |        |
| SNR2D     | Small nuclear P02136 SNR2D_HUMAN        | 153.25 | 22 | 24 | 24 | 32 | 24 | 24 | 24 | 16 | 8  | 2  | 4        | 0        | 3.92E+05 | 3.04E+07 | 5,85E+05 | 0        | 30       | 85E+05   | 1.75E+06 | 11       | 11       | 14       | 22 | 22 | 0  | 3  | 12  | 8           | Mutation | 18555 |             |       |    |             |             |             |             |        |
| PSA7      | Proteasome O14813 PSA7_HUMAN            | 153.25 | 26 | 39 | 39 | 9  | 20 | 38 | 39 | 44 | 17 | 12 | 23       | 3,11E+06 | 1,36E+07 | 1,18E+07 | 3,63E+04 | 2,65E+06 | 1,43E+07 | 1,95E+07 | 5,97E+06 | 1,95E+06 | 2,50E+05 | 5,02E+06 | 12 | 12 | 11 | 25 | 20  | 2           | 7        | 25    | 23          | 18    | 6  | 3           | 10          | Deamidate   | 27887       |        |
| TCPE      | T-complex P48643 TCPE_HUMAN             | 153.21 | 8  | 15 | 21 | 0  | 4  | 15 | 19 | 10 | 4  | 4  | 6        | 6,18E+06 | 1,30E+07 | 1,28E+07 | 6,18E+06 | 1,93E+07 | 2,27E+07 | 9,05E+06 | 9,04E+05 | 1,92E+06 | 2,77E+06 | 20       | 20 | 9  | 18 | 19 | 0   | 3           | 19       | 22    | 14          | 4     | 4  | 6           | Phosphoryl  | 59671       |             |        |
| K2ZD      | Keratin 10 Q01546 K2ZD_HUMAN            | 153.13 | 12 | 9  | 9  | 14 | 10 | 8  | 12 | 9  | 8  | 10 | 14       | 0        | 4,29E+06 | 0        | 0        | 0        | 6,00E+04 | 0        | 0        | 1,29E+06 | 10       | 28       | 6  | 30 | 39 | 32 | 163 | 43          | 33       | 24    | 26          | 40    | 48 | 59          | Beta-methyl | 65841       |             |        |
| ERIN2     | Erin-2 O5-094905 ERIN2_HUMAN            | 153.12 | 20 | 26 | 20 | 8  | 15 | 20 | 23 | 18 | 18 | 14 | 19       | 5,74E+06 | 6,45E+06 | 4,56E+06 | 0        | 3,24E+06 | 7,55E+06 | 4,58E+06 | 1,92E+06 | 2,10E+06 | 9,76E+05 | 3,48E+06 | 14 | 11 | 17 | 19 | 15  | 4           | 9        | 17    | 18          | 7     | 13 | 9           | 14          | Phosphoryl  | 37840       |        |
| ESRRA4    | Esrin-4 (Foa) F11594 ESRRA4_HUMAN       | 152.72 | 20 | 26 | 20 | 8  | 15 | 20 | 23 | 18 | 18 | 14 | 19       | 5,74E+06 | 6,45E+06 | 4,56E+06 | 0        | 3,24E+06 | 7,55E+06 | 4,58E+06 | 1,92E+06 | 2,10E+06 | 9,76E+05 | 3,48E+06 | 14 | 11 | 17 | 19 | 15  | 4           | 9        | 17    | 18          | 7     | 13 | 9           | 14          | Phosphoryl  | 97242       |        |
| HS905     | Putative h4 Q58903 HS905_HUMAN          | 152.7  | 13 | 12 | 16 | 4  | 4  | 16 | 12 | 9  | 8  | 4  | 0        | 0        | 0        | 0        | 0        | 0        | 2,17E+05 | 0        | 0        | 3,28E+06 | 31       | 27       | 2  | 5  | 40 | 48 | 29  | 11          | 6        | 8     | Beta-methyl | 38738 |    |             |             |             |             |        |
| PSD12     | 26S protea 000232 PSD12_HUMAN           | 152.59 | 10 | 9  | 7  | 5  | 7  | 15 | 22 | 11 | 7  | 0  | 7        | 6,31E+06 | 8,54E+06 | 1,12E+07 | 3,87E+05 | 1,03E+06 | 1,06E+07 | 1,68E+07 | 1,92E+06 | 6,19E+06 | 8,89E+05 | 0        | 15 | 15 | 12 | 12 | 11  | 2           | 5        | 12    | 20          | 13    | 4  | 5           | 5           | Phosphoryl  | 52904       |        |
| XBRRA1    | Carboxypeptidase Y13689 XBRRA1_HUMAN    | 152.48 | 8  | 13 | 9  | 4  | 7  | 13 | 14 | 9  | 8  | 5  | 11       | 3,74E+06 | 7,70E+06 | 9,61E+06 | 1,18E+06 | 5,72E+06 | 7,57E+06 | 8,57E+06 | 1,80E+06 | 3,07E+06 | 2,04E+06 | 9,73E+06 | 12 | 12 | 8  | 11 | 13  | 3           | 7        | 11    | 12          | 6     | 4  | 4           | 8           | Beta-methyl | 56233       |        |
| FRVTC2    | 60S riboso Y118705 FRVTC2_HUMAN         | 152.42 | 26 | 24 | 24 | 31 | 26 | 5  | 5  | 12 | 19 | 5  | 13       | 1,09E+07 | 1,87E+07 | 1,62E+07 | 1,18E+06 | 1,81E+06 | 3,20E+07 | 1,58E+07 | 1,41E+05 | 0        | 7,62E+05 | 16       | 15 | 14 | 12 | 15 | 0   | 5           | 21       | 24    | 14          | 1     | 2  | 1           | 5           | Mutation    | 18555       |        |
| VAMP3     | Vesicle-ass Q15383 VAMP3_HUMAN          | 152.34 | 52 | 52 | 36 | 40 | 52 | 52 | 52 | 52 | 52 | 52 | 52       | 9,97E+06 | 2,01E+07 | 2,09E+07 | 1,59E+06 | 1,02E+07 | 3,02E+07 | 1,95E+07 | 1,88E+06 | 6,02E+06 | 2,59E+06 | 1,17E+07 | 7  | 7  | 17 | 12 | 22  | 20          | 8        | 12    | 25          | 19    | 12 | 14          | 5           | 15          | Deamidate   | 11309  |
| SFXN1     | Sideroflexin Q9H9B4 SFXN1_HUMAN         | 152.14 | 22 | 23 | 26 | 19 | 22 | 23 | 23 | 23 | 16 | 23 | 16       | 2,15E+07 | 2,01E+07 | 1,47E+07 | 1,70E+06 | 6,41E+06 | 2,12E+07 | 1,82E+07 | 7,61E+06 | 6,77E+06 | 3,19E+06 | 9,83E+06 | 12 | 9  | 14 | 18 | 8   | 12          | 1        | 5     | 13          | 13    | 8  | 4           | 3           | 9           | Beta-methyl | 130369 |
| ADA94C0U1 | Tripeptidyl Y1A0A94C0U1 ADA94C0U1_HUMAN | 152.09 | 2  | 7  | 12 | 1  | 5  | 8  | 10 | 8  | 3  | 1  | 3        | 0        | 3,57E+06 | 3,99E+06 | 6,40E+05 | 2,99E+06 | 5,15E+06 | 5,67E+06 | 2,11E+06 | 4,75E+05 | 2,85E+06 | 2,09E+06 | 24 | 24 | 2  | 8  | 12  | 1           | 5        | 14    | 13          | 8     | 4  | 3           | 9           | Beta-methyl | 139765      |        |
| QSVZU9    | Tripeptidyl Y1G5VZU9 QSVZU9_HUMAN       | 152.09 | 2  | 6  | 11 | 1  | 4  | 4  | 8  | 8  | 3  | 2  | 7        | 0        | 3,57E+06 | 3,99E+06 | 6,40E+05 | 2,99E+06 | 5,15E+06 | 5,67E+06 | 2,11E+06 | 4,75E+05 | 2,85E+06 | 2,09E+06 | 24 | 24 | 2  | 8  | 12  | 1           | 5        | 14    | 13          | 8     | 4  | 3           | 9           | Beta-methyl | 139765      |        |
| ADA94C1B8 | Tripeptidyl Y1A0A94C1B8 ADA94C1B8_HUMAN | 152.09 | 2  | 7  | 12 | 1  | 5  | 8  | 10 | 8  | 3  | 1  | 3        | 0        | 3,57E+06 | 3,99E+06 | 6,40E+05 | 2,99E+06 | 5,15E+06 | 5,67E+06 | 2,11E+06 | 4,75E+05 | 2,85E+06 | 2,09E+06 | 24 | 24 | 2  | 8  | 12  | 1           | 5        | 14    | 13          | 8     | 4  | 3           | 9           | Beta-methyl | 139765      |        |
| PABP3     | Polyadenyl Q9H9S1 PABP3_HUMAN           | 152.05 | 17 | 14 | 16 | 8  | 9  | 13 | 16 | 11 | 6  | 6  | 8        | 3,87E+04 | 0        | 0        | 0        | 0        | 0        | 0        | 0        | 0        | 0        | 0        | 0  | 0  | 0  | 0  | 19  | 3           | 21       | 25    | 23          | 19    | 9  | 6           | 8           | Phosphoryl  | 70031       |        |
| HSPT4     | Heat shock P34932 HSPT4_HUMAN           | 151.99 | 10 | 14 | 14 | 1  | 3  | 11 | 14 | 12 | 7  | 0  | 10       | 1,82E+06 | 6,92E+06 | 6,49E+06 | 2,99E+05 | 1,31E+05 | 1,19E+07 | 1,74E+07 | 3,26E+06 | 3,96E+05 | 1,17E+06 | 20       | 19 | 15 | 20 | 7  | 8   | 1           | 4        | 19    | 20          | 14    | 7  | 0           | 9           | Beta-methyl | 94331       |        |
| H3BP7     | RNA-bindin Y1H3BP7 H3BP7_HUMAN          | 151.87 | 11 | 13 | 12 | 0  | 9  | 13 | 14 | 10 | 7  | 0  | 10       | 1,46E+06 | 2,56E+06 | 7,08E+06 | 0        | 0        | 1,59E+06 | 1,67E+07 | 8,54E+06 | 0        | 6,40E+06 | 11       | 8  | 5  | 9  | 7  | 7   | 14          | 15       | 0     | 0           | 0     | 0  | 0           | 0           | Methylation | 53497       |        |
| FUS       | RNA-bindin P35637 FUS_HUMAN             | 151.87 | 11 | 13 | 12 | 0  | 9  | 13 | 14 | 10 | 7  | 0  | 10       | 1,46E+06 | 2,56E+06 | 7,08E+06 | 0        | 0        | 1,59E+06 | 1,67E+07 | 8,54E+06 | 0        | 6,40E+06 | 12       | 9  | 6  | 9  | 7  | 7   | 14          | 15       | 0     | 0           | 0     | 0  | 0           | 0           | Methylation | 53426       |        |
| PSM07     | 26S protea P51665 PSM07_HUMAN           | 151.79 | 26 | 26 | 16 | 3  | 10 | 30 | 27 | 18 | 3  | 8  | 7,55E+06 | 1,09E+07 | 7,55E+06 | 1,04E+05 | 0        | 5,56E+06 | 1,82E+07 | 3,92E+06 | 6,27E+05 | 0        | 1,19E+06 | 9        | 9  | 11 | 14 | 12 | 1   | 2           | 8        | 15    | 8           | 3     | 1  | 5           | Deamidate   | 37025       |             |        |
| NACAM     | NACAM-put P9PAV3 NACAM_HUMAN            | 151.72 | 12 | 11 | 13 | 2  | 10 | 10 | 9  | 13 | 14 | 0  | 0        | 1,28E+06 | 1,66E+07 | 2,25E+07 | 4,07E+05 | 1,06E+07 | 2,27E+07 | 7,83E+06 | 5,15E+06 | 1,26E+07 | 4,53E+06 | 52       | 51 | 26 | 25 | 26 | 7   | 20          | 22       | 28    | 24          | 12    | 13 | 14          | Beta-methyl | 205419      |             |        |
| PSD11     | 26S protea 000231 PSD11_HUMAN           | 151.34 | 24 | 37 | 27 | 7  | 11 | 28 | 34 | 12 | 10 | 13 | 15       | 3,51E+06 | 5,49E+06 | 5,24E+06 | 4,70E+04 | 8,10E+05 | 4,96E+06 | 1,13E+07 | 9,54E+05 | 1,25E+05 | 1,47E+05 | 8,33E+05 | 18 | 18 | 18 | 24 | 19  | 2           | 5        | 16    | 25          | 6     | 4  | 4           | 9           | Phosphoryl  | 47464       |        |
| AA072V49  | Laminin su Y1A072V49 AA072V49_HUMAN     | 151.32 | 7  | 8  | 6  | 1  | 6  | 4  | 5  | 4  | 4  | 2  | 5        | 2,18E+06 | 7,29E+06 | 4,67E+06 | 2,76E+05 | 8,10E+06 | 3,17E+06 | 9,52E+05 | 7,89E+05 | 5,58E+06 | 2,04E+06 | 1,13E+07 | 15 | 15 | 14 | 22 | 17  | 3           | 9        | 8     | 9           | 6     | 9  | 4           | 11          | Phosphoryl  | 186942      |        |
| LAMB1     | Laminin su Y1A072V49 LAMB1_HUMAN        | 151.32 | 6  | 7  | 6  | 1  | 6  | 4  | 5  | 4  | 2  | 4  | 5        | 2,18E+06 | 7,29E+06 | 4,67E+06 | 2,76E+05 | 8,10E+06 | 3,17E+06 | 9,52E+05 | 7,89E+05 | 5,58E+06 | 2,04E+06 | 1,13E+07 | 15 | 15 | 14 | 22 | 17  | 3           | 9        | 8     | 9           | 6     | 9  | 4           | 11          | Phosphoryl  | 186942      |        |
| G3X42     | Laminin su Y1G3X42 G3X42_HUMAN          | 151.32 | 8  | 8  | 6  | 1  | 4  | 5  | 4  | 4  | 2  | 3  | 2,18E+06 | 7,29E+06 | 4,67E+06 | 2,76E+05 | 8,10E+06 | 3,17E+06 | 9,52E+05 | 7,89E+05 | 5,58E+06 | 2,04E+06 | 1,13E+07 | 14       | 14 | 14 | 22 | 17 | 3   | 7           | 8        | 9     | 6           | 8     | 4  | 10          | Phosphoryl  | 182586      |             |        |
| TM119     | Transmem Y04916 TM119_HUMAN             | 151.23 | 7  | 8  | 6  | 1  | 5  | 4  | 5  | 4  | 2  | 3  | 3,42E+07 | 3,18E+07 | 4,60E+07 | 1,18E+07 | 3,81E+07 | 5,09E+07 | 2,69E+07 | 2,45E+07 | 2,45E+07 | 2,75E+07 | 14       | 13       | 17 | 13 | 17 | 10 | 19  | 14          | 22       | 16    | 11          | 18    | 22 | Beta-methyl | 29203       |             |             |        |
| HDAC2     | Histone de Q22769 HDAC2_HUMAN           | 151.14 | 10 | 7  | 10 | 0  | 2  | 11 | 6  | 10 | 2  | 0  | 8        | 4,25E+06 | 3,04E+06 | 3,78E+06 | 8,26E+04 | 3,25E+06 | 4,31E+06 | 6,88E+06 | 3,44E+04 | 0        | 6,30E+06 | 9        | 9  | 9  | 11 | 7  | 8   | 0           | 2        | 7     | 12          | 5     | 1  | 0           | 4           | Deamidate   | 55364       |        |
| ADA6QB2H7 | Protein Y1A0A6QB2H7 ADA6QB2H7_HUMAN     | 151.12 | 22 | 27 | 26 | 0  | 5  | 26 | 26 | 26 | 10 | 0  | 7        | 4,23E+06 | 6,05E+06 | 4,97E+06 | 0        | 5,11E+06 | 1,25E+07 | 6,71E+06 | 0        | 4,94E+04 | 9        | 9        | 9  | 14 | 16 | 10 | 1   | 9           | 20       | 17    | 1           | 1     | 0  | 1           | Deamidate   | 29283       |             |        |
| ADA6QB2G0 | Protein Y1A0A6QB2G0 ADA6QB2G0_HUMAN     | 151.12 | 22 | 26 | 25 | 0  | 5  | 25 | 25 | 25 | 10 | 0  | 7        | 4,23E+06 | 6,05E+06 | 4,97E+06 | 0        | 5,11E+06 | 1,25E+07 | 6,71E+06 | 0        | 4,94E+04 | 9        | 9        | 9  | 14 | 16 | 10 | 1   | 9           | 20       | 17    | 1           | 1     | 0  | 1           | Deamidate   | 29710       |             |        |
| ADA6QB2F0 | Protein Y1A0A6QB2F0 ADA6QB2F0_HUMAN     | 151.12 | 16 | 20 | 19 | 0  | 4  | 19 | 19 | 19 | 7  | 0  | 5        | 4,23E+06 | 6,05E+06 | 4,97E+06 | 0        | 5,11E+06 | 1,25E+07 | 6,71E+06 | 0        | 4,94E+04 | 9        |          |    |    |    |    |     |             |          |       |             |       |    |             |             |             |             |        |



|             |                                            |        |    |    |    |    |    |    |    |    |    |          |           |          |          |          |          |          |          |          |          |          |          |          |    |    |    |    |    |    |    |    |    |    |          |            |            |            |            |       |
|-------------|--------------------------------------------|--------|----|----|----|----|----|----|----|----|----|----------|-----------|----------|----------|----------|----------|----------|----------|----------|----------|----------|----------|----------|----|----|----|----|----|----|----|----|----|----|----------|------------|------------|------------|------------|-------|
| SE11        | Protein set Q9UBV2 SE11_HUMAN              | 136.79 | 8  | 4  | 6  | 2  | 5  | 9  | 9  | 2  | 2  | 4        | 4         | 1.70E+06 | 4.96E+06 | 1.84E+06 | 2.61E+05 | 4.44E+05 | 3.03E+06 | 2.35E+06 | 3.11E+05 | 0        | 5.95E+05 | 1.09E+06 | 8  | 8  | 9  | 7  | 9  | 1  | 5  | 14 | 10 | 2  | 1        | 4          | 6          | Phosphoryl | 88755      |       |
| HG01        | Hepatoga- Q7ZAV5 HG02_HUMAN                | 136.75 | 12 | 8  | 14 | 0  | 2  | 10 | 11 | 14 | 3  | 1        | 3         | 4.75E+06 | 6.03E+06 | 6.13E+06 | 0        | 6.78E+06 | 9.34E+06 | 5.07E+06 | 6.11E+04 | 0        | 0        | 0        | 0  | 15 | 12 | 12 | 11 | 11 | 0  | 2  | 8  | 13 | 15       | 2          | 2          | 2          | Phosphoryl | 74317 |
| PGM1        | Phosphoglyc P36871 PGM1_HUMAN              | 136.7  | 15 | 14 | 16 | 0  | 2  | 10 | 11 | 16 | 4  | 3        | 5         | 7.98E+06 | 1.21E+07 | 9.61E+06 | 2.68E+05 | 4.49E+06 | 1.84E+07 | 8.51E+06 | 2.76E+05 | 1.93E+05 | 8.02E+05 | 12       | 12 | 19 | 14 | 12 | 0  | 6  | 10 | 14 | 14 | 4  | 2        | 2          | 6          | Phosphoryl | 61449      |       |
| AD0323 BTK7 | Adiponectin AD0323 BTK7_HUMAN              | 136.7  | 15 | 13 | 16 | 0  | 2  | 10 | 11 | 16 | 15 | 4        | 5         | 7.98E+06 | 1.21E+07 | 9.61E+06 | 2.68E+05 | 4.49E+06 | 1.84E+07 | 8.51E+06 | 2.76E+05 | 1.93E+05 | 8.02E+05 | 12       | 12 | 19 | 14 | 12 | 0  | 6  | 10 | 14 | 14 | 4  | 2        | 2          | 6          | Phosphoryl | 61449      |       |
| IP05        | Importin-5 O00410 IP05_HUMAN               | 136.63 | 5  | 7  | 7  | 0  | 0  | 4  | 11 | 11 | 0  | 1        | 1         | 2.10E+06 | 5.28E+06 | 3.62E+06 | 2.75E+06 | 9.95E+06 | 1.62E+06 | 0        | 0        | 0        | 0        | 10       | 10 | 8  | 9  | 13 | 0  | 0  | 6  | 20 | 4  | 0  | 0        | 0          | 1          | Phosphoryl | 123630     |       |
| BRZ2A8      | Glutaminin tr BRZ2A8 BRZ2A8_HUMAN          | 136.44 | 25 | 25 | 20 | 20 | 25 | 20 | 21 | 25 | 20 | 25       | 20        | 1.44E+06 | 3.37E+06 | 2.81E+06 | 2.95E+04 | 5.98E+05 | 6.17E+06 | 3.89E+06 | 7.39E+05 | 4.03E+05 | 4.82E+04 | 9.52E+05 | 6  | 4  | 9  | 10 | 3  | 0  | 0  | 6  | 20 | 4  | 0        | 0          | 0          | 1          | Phosphoryl | 18634 |
| BRZ2C5      | Glutaminin tr BRZ2C5 BRZ2C5_HUMAN          | 136.44 | 34 | 34 | 39 | 33 | 33 | 33 | 33 | 33 | 33 | 33       | 33        | 1.44E+06 | 3.37E+06 | 2.81E+06 | 2.95E+04 | 5.98E+05 | 6.17E+06 | 3.89E+06 | 7.39E+05 | 4.03E+05 | 4.82E+04 | 9.52E+05 | 6  | 5  | 7  | 8  | 7  | 2  | 3  | 9  | 8  | 4  | 3        | 3          | 7          | Phosphoryl | 11873      |       |
| EDR2        | Etin GSH P15311 EDR2_HUMAN                 | 136.41 | 16 | 18 | 19 | 0  | 0  | 15 | 18 | 14 | 0  | 2        | 0         | 2.91E+06 | 7.66E+06 | 1.12E+07 | 1.62E+06 | 1.76E+07 | 5.52E+06 | 0        | 0        | 0        | 0        | 16       | 8  | 17 | 18 | 32 | 0  | 0  | 0  | 15 | 24 | 19 | 0        | 1          | 0          | 0          | Deamidat   | 69413 |
| ETC04       | Etin GSH tr ETC04 ETC04_HUMAN              | 136.41 | 16 | 18 | 19 | 0  | 0  | 15 | 18 | 14 | 0  | 2        | 0         | 2.91E+06 | 7.66E+06 | 1.12E+07 | 1.62E+06 | 1.76E+07 | 5.52E+06 | 0        | 0        | 0        | 0        | 16       | 8  | 17 | 18 | 32 | 0  | 0  | 0  | 15 | 24 | 19 | 0        | 1          | 0          | 0          | Deamidat   | 38029 |
| NDU52       | NADH deH 075306 NDU52_HUMAN                | 136.39 | 18 | 20 | 4  | 16 | 20 | 10 | 6  | 3  | 0  | 27       | 52.32E+06 | 8.72E+06 | 3.98E+06 | 2.93E+06 | 1.20E+06 | 9.72E+06 | 6.15E+06 | 5.48E+05 | 2.40E+05 | 0        | 0        | 5.34E+06 | 17 | 17 | 21 | 14 | 14 | 1  | 8  | 20 | 15 | 7  | 3        | 2          | 14         | Phosphoryl | 52546      |       |
| FBW06       | Nucleosom tr FBW06 FBW06_HUMAN             | 136.22 | 15 | 20 | 0  | 3  | 16 | 15 | 15 | 3  | 0  | 7        | 9.78E+05  | 4.00E+06 | 8.51E+06 | 7.66E+06 | 9.36E+06 | 4.85E+06 | 0        | 0        | 0        | 0        | 6        | 4        | 10 | 12 | 13 | 0  | 2  | 11 | 12 | 11 | 1  | 0  | 3        | Deamidat   | 43868      |            |            |       |
| FBW020      | Nucleosom tr FBW020 FBW020_HUMAN           | 136.22 | 27 | 27 | 0  | 5  | 29 | 27 | 5  | 0  | 13 | 9.78E+05 | 4.00E+06  | 8.51E+06 | 7.66E+06 | 9.36E+06 | 4.85E+06 | 0        | 0        | 0        | 0        | 6        | 4        | 10       | 12 | 13 | 0  | 2  | 11 | 12 | 11 | 1  | 0  | 3  | Deamidat | 24366      |            |            |            |       |
| FBV59       | Nucleosom tr FBV59 FBV59_HUMAN             | 136.22 | 17 | 17 | 0  | 3  | 18 | 17 | 3  | 0  | 8  | 9.78E+05 | 4.00E+06  | 8.51E+06 | 7.66E+06 | 9.36E+06 | 4.85E+06 | 0        | 0        | 0        | 0        | 6        | 4        | 10       | 12 | 13 | 0  | 2  | 11 | 12 | 11 | 1  | 0  | 3  | Deamidat | 40522      |            |            |            |       |
| BZ2C2       | Nucleosom tr BZ2C2 BZ2C2_HUMAN             | 136.22 | 16 | 16 | 0  | 3  | 17 | 16 | 3  | 0  | 8  | 9.78E+05 | 4.00E+06  | 8.51E+06 | 7.66E+06 | 9.36E+06 | 4.85E+06 | 0        | 0        | 0        | 0        | 6        | 4        | 10       | 12 | 13 | 0  | 2  | 11 | 12 | 11 | 1  | 0  | 3  | Deamidat | 40512      |            |            |            |       |
| NP111       | Nucleosom P55209 NP111_HUMAN               | 136.22 | 14 | 14 | 0  | 3  | 15 | 14 | 3  | 0  | 7  | 9.78E+05 | 4.00E+06  | 8.51E+06 | 7.66E+06 | 9.36E+06 | 4.85E+06 | 0        | 0        | 0        | 0        | 6        | 4        | 10       | 12 | 13 | 0  | 2  | 11 | 12 | 11 | 1  | 0  | 3  | Deamidat | 45374      |            |            |            |       |
| HOYV4       | Nucleosom tr HOYV4 HOYV4_HUMAN             | 136.22 | 15 | 15 | 0  | 3  | 15 | 15 | 3  | 0  | 7  | 9.78E+05 | 4.00E+06  | 8.51E+06 | 7.66E+06 | 9.36E+06 | 4.85E+06 | 0        | 0        | 0        | 0        | 6        | 4        | 10       | 12 | 13 | 0  | 2  | 11 | 12 | 11 | 1  | 0  | 3  | Deamidat | 44714      |            |            |            |       |
| FSH486      | Nucleosom tr FSH486 FSH486_HUMAN           | 136.22 | 15 | 15 | 0  | 3  | 15 | 15 | 3  | 0  | 7  | 9.78E+05 | 4.00E+06  | 8.51E+06 | 7.66E+06 | 9.36E+06 | 4.85E+06 | 0        | 0        | 0        | 0        | 6        | 4        | 10       | 12 | 13 | 0  | 2  | 11 | 12 | 11 | 1  | 0  | 3  | Deamidat | 44627      |            |            |            |       |
| FBV01       | Nucleosom tr FBV01 FBV01_HUMAN             | 136.22 | 24 | 24 | 0  | 4  | 25 | 24 | 4  | 0  | 11 | 9.78E+05 | 4.00E+06  | 8.51E+06 | 7.66E+06 | 9.36E+06 | 4.85E+06 | 0        | 0        | 0        | 0        | 6        | 4        | 10       | 12 | 13 | 0  | 2  | 11 | 12 | 11 | 1  | 0  | 3  | Deamidat | 27724      |            |            |            |       |
| FBV35       | Nucleosom tr FBV35 FBV35_HUMAN             | 136.22 | 21 | 21 | 0  | 4  | 22 | 21 | 4  | 0  | 10 | 9.78E+05 | 4.00E+06  | 8.51E+06 | 7.66E+06 | 9.36E+06 | 4.85E+06 | 0        | 0        | 0        | 0        | 6        | 4        | 10       | 12 | 13 | 0  | 2  | 11 | 12 | 11 | 1  | 0  | 3  | Deamidat | 31021      |            |            |            |       |
| HOYH3       | Nucleosom tr HOYH3 HOYH3_HUMAN             | 136.22 | 28 | 28 | 0  | 5  | 30 | 28 | 5  | 0  | 14 | 9.78E+05 | 4.00E+06  | 8.51E+06 | 7.66E+06 | 9.36E+06 | 4.85E+06 | 0        | 0        | 0        | 0        | 6        | 4        | 10       | 12 | 13 | 0  | 2  | 11 | 12 | 11 | 1  | 0  | 3  | Deamidat | 23418      |            |            |            |       |
| FBW118      | Nucleosom tr FBW118 FBW118_HUMAN           | 136.22 | 27 | 27 | 0  | 5  | 28 | 27 | 5  | 0  | 13 | 9.78E+05 | 4.00E+06  | 8.51E+06 | 7.66E+06 | 9.36E+06 | 4.85E+06 | 0        | 0        | 0        | 0        | 6        | 4        | 10       | 12 | 13 | 0  | 2  | 11 | 12 | 11 | 1  | 0  | 3  | Deamidat | 24694      |            |            |            |       |
| FBV06       | Nucleosom tr FBV06 FBV06_HUMAN             | 136.22 | 26 | 26 | 0  | 5  | 27 | 26 | 5  | 0  | 13 | 9.78E+05 | 4.00E+06  | 8.51E+06 | 7.66E+06 | 9.36E+06 | 4.85E+06 | 0        | 0        | 0        | 0        | 6        | 4        | 10       | 12 | 13 | 0  | 2  | 11 | 12 | 11 | 1  | 0  | 3  | Deamidat | 24998      |            |            |            |       |
| POKV        | Premyelocyte Q9UHG3 POKV_HUMAN             | 136.18 | 13 | 17 | 2  | 14 | 12 | 3  | 11 | 10 | 14 | 1.13E+07 | 1.74E+07  | 1.20E+07 | 1.10E+05 | 8.43E+06 | 2.52E+07 | 1.57E+07 | 6.59E+06 | 4.43E+06 | 2.70E+06 | 1.16E+07 | 10       | 10       | 16 | 18 | 18 | 1  | 10 | 21 | 13 | 6  | 8  | 7  | 15       | Deamidat   | 56640      |            |            |       |
| USS1        | 116 kDa U1 Q15029 USS1_HUMAN               | 136.11 | 11 | 13 | 11 | 0  | 5  | 17 | 11 | 3  | 4  | 1        | 9         | 3.18E+06 | 7.11E+06 | 3.52E+06 | 5.30E+05 | 1.23E+07 | 7.24E+06 | 9.07E+04 | 5.63E+05 | 0        | 0        | 1.28E+06 | 18 | 17 | 15 | 18 | 13 | 0  | 5  | 21 | 11 | 4  | 4        | 1          | 8          | Phosphoryl | 109436     |       |
| DCTN1       | Dynactin sc Q14203 DCTN1_HUMAN             | 135.91 | 6  | 9  | 11 | 1  | 1  | 10 | 11 | 7  | 2  | 0        | 2         | 1.47E+06 | 4.66E+06 | 2.89E+06 | 8.10E+04 | 0        | 1.32E+07 | 4.48E+06 | 1.97E+06 | 4.92E+04 | 0        | 0        | 18 | 18 | 9  | 14 | 18 | 1  | 1  | 15 | 13 | 2  | 0        | 2          | Phosphoryl | 141694     |            |       |
| AD042P0243  | Dynactin sc tr AD042P0243 AD042P0243_HUMAN | 135.91 | 6  | 9  | 11 | 1  | 1  | 10 | 11 | 7  | 2  | 0        | 2         | 1.47E+06 | 4.66E+06 | 2.89E+06 | 8.10E+04 | 0        | 1.32E+07 | 4.48E+06 | 1.97E+06 | 4.92E+04 | 0        | 0        | 18 | 18 | 9  | 14 | 18 | 1  | 1  | 15 | 13 | 2  | 0        | 2          | Phosphoryl | 139764     |            |       |
| AD042P0246  | Dynactin sc tr AD042P0246 AD042P0246_HUMAN | 135.91 | 6  | 9  | 11 | 1  | 1  | 10 | 11 | 7  | 2  | 0        | 2         | 1.47E+06 | 4.66E+06 | 2.89E+06 | 8.10E+04 | 0        | 1.32E+07 | 4.48E+06 | 1.97E+06 | 4.92E+04 | 0        | 0        | 18 | 18 | 9  | 14 | 18 | 1  | 1  | 15 | 13 | 2  | 0        | 2          | Phosphoryl | 141694     |            |       |
| EXY80       | Dynactin sc tr EXY80 EXY80_HUMAN           | 135.91 | 6  | 9  | 11 | 1  | 1  | 10 | 11 | 7  | 2  | 0        | 2         | 1.47E+06 | 4.66E+06 | 2.89E+06 | 8.10E+04 | 0        | 1.32E+07 | 4.48E+06 | 1.97E+06 | 4.92E+04 | 0        | 0        | 18 | 18 | 9  | 14 | 18 | 1  | 1  | 15 | 13 | 2  | 0        | 2          | Phosphoryl | 139094     |            |       |
| TPN01       | Transportin Q92973 TPN01_HUMAN             | 135.39 | 8  | 9  | 8  | 2  | 2  | 5  | 8  | 5  | 2  | 2        | 5         | 1.76E+07 | 1.80E+07 | 1.60E+07 | 8.67E+04 | 2.63E+06 | 1.50E+07 | 3.11E+07 | 8.35E+06 | 2.10E+06 | 4.85E+06 | 12       | 12 | 17 | 17 | 14 | 1  | 3  | 7  | 2  | 5  | 5  | 5        | 6          | Deamidat   | 102355     |            |       |
| PRB         | Alkaline ph P05186 PRB_HUMAN               | 135.23 | 19 | 16 | 15 | 5  | 18 | 17 | 17 | 14 | 16 | 8.64E+06 | 1.09E+07  | 7.34E+06 | 2.26E+06 | 1.35E+07 | 1.79E+07 | 6.63E+06 | 5.20E+06 | 3.65E+06 | 7.18E+06 | 12       | 12       | 12       | 12 | 13 | 5  | 12 | 13 | 13 | 8  | 9  | 14 | 15 | 15       | Deamidat   | 57305      |            |            |       |
| RL8         | Ribosome P62917 RL8_HUMAN                  | 135.13 | 21 | 29 | 19 | 17 | 14 | 26 | 18 | 17 | 14 | 16       | 2.13E+07  | 2.85E+07 | 1.60E+07 | 1.80E+06 | 4.54E+06 | 4.61E+07 | 4.60E+07 | 2.25E+07 | 4.33E+06 | 2.28E+06 | 6.28E+06 | 10       | 10 | 22 | 18 | 15 | 7  | 17 | 19 | 17 | 7  | 11 | 10       | Deamidat   | 28025      |            |            |       |
| NDU48       | NADH deH P15970 NDU48_HUMAN                | 135.09 | 30 | 29 | 20 | 30 | 20 | 30 | 20 | 30 | 20 | 3        | 2.10E+07  | 2.28E+07 | 9.31E+06 | 2.46E+06 | 7.04E+06 | 4.91E+07 | 1.87E+07 | 1.88E+07 | 8.67E+06 | 2.84E+06 | 1.29E+07 | 10       | 9  | 9  | 14 | 10 | 5  | 15 | 17 | 12 | 3  | 7  | 10       | Deamidat   | 20105      |            |            |       |
| PP1G        | Serine/thr P36873 PP1G_HUMAN               | 134.83 | 15 | 20 | 14 | 0  | 5  | 12 | 16 | 4  | 0  | 0        | 0         | 0        | 0        | 0        | 0        | 0        | 0        | 0        | 0        | 0        | 0        | 1        | 6  | 16 | 8  | 0  | 1  | 8  | 10 | 9  | 1  | 0  | 3        | Phosphoryl | 36684      |            |            |       |
| FBV8E       | Serine/thr tr FBV8E FBV8E_HUMAN            | 13     |    |    |    |    |    |    |    |    |    |          |           |          |          |          |          |          |          |          |          |          |          |          |    |    |    |    |    |    |    |    |    |    |          |            |            |            |            |       |

|            |                                       |        |    |    |    |    |    |    |    |    |    |          |          |          |          |          |          |          |          |          |          |          |          |          |    |    |    |    |    |    |    |    |    |    |    |           |           |             |        |
|------------|---------------------------------------|--------|----|----|----|----|----|----|----|----|----|----------|----------|----------|----------|----------|----------|----------|----------|----------|----------|----------|----------|----------|----|----|----|----|----|----|----|----|----|----|----|-----------|-----------|-------------|--------|
| ACNU       | Apoptotic (C9QKV3)ACNU_HUMA           | 129.98 | 9  | 9  | 8  | 0  | 0  | 13 | 12 | 8  | 2  | 1        | 1        | 2,07E+06 | 8,66E+06 | 3,98E+06 | 9,76E+06 | 5,78E+06 | 2,94E+06 | 4,00E+06 | 6,08E+05 | 8,48E+04 | 25       | 25       | 19 | 14 | 11 | 0  | 0  | 22 | 18 | 14 | 3  | 1  | 2  | Beta-meth | 151861    |             |        |
| DCMS       | Program Q8WU44 PC02L_HUMA             | 129.79 | 6  | 12 | 14 | 0  | 2  | 6  | 12 | 11 | 4  | 3        | 1        | 2,83E+06 | 7,59E+06 | 1,43E+07 | 8,01E+06 | 4,37E+06 | 2,13E+07 | 6,95E+06 | 6,03E+05 | 1,42E+05 | 5,90E+05 | 16       | 16 | 9  | 14 | 22 | 0  | 3  | 6  | 21 | 11 | 5  | 6  | 2         | Deamidat  | 96023       |        |
| P0857      | Dihydrogote Q9Y394 DHMS7_HUMA         | 129.49 | 12 | 10 | 10 | 6  | 10 | 18 | 10 | 10 | 10 | 9        | 12       | 1,53E+06 | 3,89E+06 | 5,60E+06 | 5,09E+04 | 1,72E+06 | 7,56E+06 | 1,28E+07 | 1,75E+06 | 1,17E+06 | 2,30E+05 | 4,42E+06 | 7  | 7  | 6  | 9  | 14 | 1  | 7  | 18 | 16 | 12 | 7  | 3         | 14        | Deamidat    | 38229  |
| NPL14      | Nucleosom tr E9P314 NPL14_HUMA        | 129.35 | 15 | 17 | 17 | 0  | 3  | 18 | 15 | 3  | 7  | 15       | 7        | 7,73E+06 | 3,24E+06 | 2,03E+06 | 1,21E+06 | 5,61E+06 | 2,16E+06 | 1,21E+06 | 1,21E+06 | 1,21E+06 | 1,21E+06 | 10       | 10 | 10 | 10 | 11 | 13 | 0  | 2  | 8  | 11 | 11 | 1  | 1         | 1         | Deamidat    | 12823  |
| C916D1     | Nucleosom tr C916D1 C916D1_HUMA       | 129.35 | 31 | 35 | 35 | 0  | 6  | 27 | 21 | 31 | 6  | 0        | 6        | 7,73E+06 | 3,16E+06 | 2,03E+06 | 1,21E+06 | 5,60E+06 | 2,16E+06 | 1,21E+06 | 1,21E+06 | 1,21E+06 | 1,21E+06 | 10       | 10 | 10 | 10 | 11 | 13 | 0  | 2  | 8  | 11 | 11 | 1  | 1         | 1         | Deamidat    | 12061  |
| E9PN17     | Nucleosom tr E9PN17 E9PN17_HUMA       | 129.35 | 27 | 45 | 45 | 0  | 7  | 34 | 27 | 39 | 7  | 0        | 7        | 5,02E+05 | 3,16E+06 | 2,03E+06 | 1,21E+06 | 5,60E+06 | 2,16E+06 | 1,21E+06 | 1,21E+06 | 1,21E+06 | 1,21E+06 | 10       | 10 | 10 | 10 | 11 | 13 | 0  | 2  | 8  | 11 | 11 | 1  | 1         | 1         | Deamidat    | 20261  |
| E9PNW0     | Nucleosom tr E9PNW0 E9PNW0_HUMA       | 129.35 | 36 | 59 | 59 | 0  | 9  | 45 | 36 | 51 | 9  | 0        | 9        | 5,02E+05 | 3,16E+06 | 2,03E+06 | 1,21E+06 | 5,60E+06 | 2,16E+06 | 1,21E+06 | 1,21E+06 | 1,21E+06 | 1,21E+06 | 10       | 10 | 10 | 10 | 11 | 13 | 0  | 2  | 8  | 11 | 11 | 1  | 1         | 1         | Deamidat    | 12250  |
| E9PJ2      | Nucleosom tr E9PJ2 E9PJ2_HUMA         | 129.35 | 30 | 49 | 49 | 0  | 8  | 38 | 30 | 43 | 8  | 0        | 8        | 5,02E+05 | 3,16E+06 | 2,03E+06 | 1,21E+06 | 5,60E+06 | 2,16E+06 | 1,21E+06 | 1,21E+06 | 1,21E+06 | 1,21E+06 | 10       | 10 | 10 | 10 | 11 | 13 | 0  | 2  | 8  | 11 | 11 | 1  | 1         | 1         | Deamidat    | 14653  |
| E9PJ4      | Nucleosom tr E9PJ4 E9PJ4_HUMA         | 129.35 | 29 | 47 | 47 | 0  | 8  | 38 | 29 | 43 | 8  | 0        | 8        | 5,02E+05 | 3,16E+06 | 2,03E+06 | 1,21E+06 | 5,60E+06 | 2,16E+06 | 1,21E+06 | 1,21E+06 | 1,21E+06 | 1,21E+06 | 10       | 10 | 10 | 10 | 11 | 13 | 0  | 2  | 8  | 11 | 11 | 1  | 1         | 1         | Deamidat    | 12982  |
| BA3P1      | B-cell reccs P51527 BA3P1_HUMAN       | 129.27 | 8  | 20 | 19 | 22 | 26 | 12 | 16 | 18 | 30 | 1,81E+07 | 3,58E+07 | 2,78E+07 | 5,78E+06 | 2,12E+07 | 6,53E+07 | 4,34E+07 | 1,13E+07 | 1,40E+07 | 6,29E+06 | 3,60E+07 | 10       | 10       | 10 | 10 | 11 | 13 | 0  | 20 | 24 | 14 | 13 | 20 | 16 | 23        | Deamidat  | 27992       |        |
| ADA7P024F9 | Double-str. tr ADA7P024F9 ADA7P_HUMA  | 129.27 | 9  | 9  | 10 | 0  | 1  | 10 | 10 | 10 | 1  | 2        | 1        | 3,07E+06 | 3,74E+06 | 7,36E+06 | 6,77E+04 | 1,06E+07 | 9,30E+06 | 1,77E+06 | 6,54E+04 | 3,45E+04 | 0        | 12       | 12 | 10 | 12 | 13 | 0  | 2  | 18 | 14 | 6  | 1  | 2  | 1         | 1         | Phosphory   | 101538 |
| ADA7P024K3 | Double-str. tr ADA7P024K3 ADA7P_HUMA  | 129.27 | 7  | 7  | 8  | 0  | 1  | 8  | 8  | 4  | 1  | 2        | 1        | 3,07E+06 | 3,74E+06 | 7,36E+06 | 6,77E+04 | 1,06E+07 | 9,30E+06 | 1,77E+06 | 6,54E+04 | 3,45E+04 | 0        | 12       | 12 | 10 | 12 | 13 | 0  | 2  | 18 | 14 | 6  | 1  | 2  | 1         | 1         | Phosphory   | 122828 |
| ADA33B39ZD | Double-str. tr ADA33B39ZD ADA3B_HUMA  | 129.22 | 7  | 6  | 8  | 0  | 1  | 8  | 7  | 4  | 1  | 1        | 1        | 3,07E+06 | 3,74E+06 | 7,36E+06 | 6,77E+04 | 1,06E+07 | 9,30E+06 | 1,77E+06 | 6,54E+04 | 3,45E+04 | 0        | 12       | 10 | 10 | 11 | 13 | 0  | 2  | 18 | 13 | 0  | 2  | 1  | 1         | 1         | Phosphory   | 123359 |
| DSRAD      | Double-str. tr DSRAD DSRAD_HUMAN      | 129.22 | 7  | 6  | 8  | 0  | 1  | 7  | 8  | 4  | 1  | 2        | 1        | 3,07E+06 | 3,74E+06 | 7,36E+06 | 6,77E+04 | 1,06E+07 | 9,30E+06 | 1,77E+06 | 6,54E+04 | 3,45E+04 | 0        | 12       | 12 | 10 | 12 | 13 | 0  | 2  | 18 | 14 | 6  | 1  | 2  | 1         | 1         | Phosphory   | 130606 |
| ADA7P0TBK2 | Acetyltrans. tr ADA7P0TBK2 ADA7P_HUMA | 129.17 | 17 | 15 | 18 | 6  | 7  | 18 | 19 | 3  | 6  | 8        | 8        | 8,19E+06 | 1,03E+07 | 1,34E+07 | 2,43E+07 | 1,39E+07 | 1,83E+07 | 7,11E+06 | 2,23E+06 | 1,08E+07 | 1,87E+07 | 6,88E+06 | 16 | 16 | 11 | 13 | 13 | 5  | 8  | 12 | 9  | 3  | 8  | 9         | 9         | Phosphory   | 59428  |
| ADA7P0TAG1 | Dihydrofolat tr ADA7P0TAG1 ADA7P_HUMA | 129.16 | 15 | 13 | 17 | 6  | 6  | 16 | 17 | 3  | 6  | 8        | 8        | 8,19E+06 | 1,03E+07 | 1,34E+07 | 2,43E+07 | 1,39E+07 | 1,83E+07 | 7,11E+06 | 2,23E+06 | 1,08E+07 | 1,87E+07 | 6,88E+06 | 16 | 16 | 11 | 13 | 13 | 5  | 8  | 12 | 9  | 3  | 8  | 9         | 9         | Phosphory   | 64786  |
| ADA7P0TAK2 | Acetyltrans. tr ADA7P0TAK2 ADA7P_HUMA | 129.16 | 15 | 13 | 16 | 5  | 6  | 15 | 17 | 3  | 5  | 7        | 7        | 8,19E+06 | 1,03E+07 | 1,34E+07 | 2,43E+07 | 1,39E+07 | 1,83E+07 | 7,11E+06 | 2,23E+06 | 1,08E+07 | 1,87E+07 | 6,88E+06 | 16 | 16 | 11 | 13 | 13 | 5  | 8  | 12 | 9  | 3  | 8  | 9         | 9         | Phosphory   | 68255  |
| ADA7P0TBK2 | Acetyltrans. tr ADA7P0TBK2 ADA7P_HUMA | 129.16 | 15 | 13 | 16 | 5  | 6  | 15 | 16 | 3  | 5  | 7        | 7        | 8,19E+06 | 1,03E+07 | 1,34E+07 | 2,43E+07 | 1,39E+07 | 1,83E+07 | 7,11E+06 | 2,23E+06 | 1,08E+07 | 1,87E+07 | 6,88E+06 | 15 | 15 | 11 | 13 | 12 | 5  | 8  | 12 | 9  | 3  | 8  | 9         | 9         | Phosphory   | 68839  |
| OP2        | Dihydrofolat P105.15 OP2_HUMAN        | 129.16 | 15 | 13 | 16 | 5  | 6  | 15 | 16 | 3  | 5  | 7        | 7        | 8,19E+06 | 1,03E+07 | 1,34E+07 | 2,43E+07 | 1,39E+07 | 1,83E+07 | 7,11E+06 | 2,23E+06 | 1,08E+07 | 1,87E+07 | 6,88E+06 | 16 | 16 | 11 | 13 | 13 | 5  | 8  | 12 | 9  | 3  | 8  | 9         | 9         | Phosphory   | 68997  |
| ADA7P0Z4G4 | Acetyltrans. tr ADA7P0Z4G4 ADA7P_HUMA | 129.17 | 17 | 15 | 18 | 6  | 7  | 17 | 19 | 3  | 6  | 8        | 8        | 8,19E+06 | 1,03E+07 | 1,34E+07 | 2,43E+07 | 1,39E+07 | 1,83E+07 | 7,11E+06 | 2,23E+06 | 1,08E+07 | 1,87E+07 | 6,88E+06 | 16 | 16 | 11 | 13 | 13 | 5  | 8  | 12 | 9  | 3  | 8  | 9         | 9         | Phosphory   | 59873  |
| ADA7P0T997 | Acetyltrans. tr ADA7P0T997 ADA7P_HUMA | 129.16 | 15 | 10 | 16 | 5  | 6  | 15 | 14 | 3  | 6  | 7        | 7        | 8,19E+06 | 1,03E+07 | 1,34E+07 | 2,43E+07 | 1,39E+07 | 1,83E+07 | 7,11E+06 | 2,23E+06 | 1,08E+07 | 1,87E+07 | 6,88E+06 | 15 | 15 | 11 | 12 | 13 | 5  | 8  | 12 | 9  | 3  | 8  | 9         | 9         | Phosphory   | 67845  |
| ADA7P0TAA7 | Acetyltrans. tr ADA7P0TAA7 ADA7P_HUMA | 129.16 | 21 | 15 | 23 | 8  | 9  | 22 | 20 | 4  | 8  | 11       | 10       | 8,19E+06 | 1,03E+07 | 1,34E+07 | 2,43E+07 | 1,39E+07 | 1,83E+07 | 7,11E+06 | 2,23E+06 | 1,08E+07 | 1,87E+07 | 6,88E+06 | 15 | 15 | 11 | 12 | 13 | 5  | 8  | 12 | 9  | 3  | 8  | 9         | 9         | Phosphory   | 47800  |
| TR26       | Transform P29591 TR26_HUMAN           | 129.16 | 20 | 17 | 17 | 0  | 16 | 16 | 11 | 4  | 0  | 0        | 0        | 3,24E+06 | 3,44E+06 | 3,41E+06 | 1,99E+06 | 2,44E+06 | 4,94E+06 | 2,29E+06 | 0        | 0        | 0        | 0        | 9  | 9  | 10 | 10 | 10 | 17 | 10 | 1  | 0  | 0  | 0  | 0         | 0         | Phosphory   | 32666  |
| CHP1       | Calcineurin Q95653 CHP1_HUMAN         | 129.14 | 21 | 30 | 30 | 0  | 27 | 41 | 48 | 24 | 18 | 12       | 18       | 2,86E+06 | 2,78E+06 | 9,57E+05 | 1,59E+06 | 1,44E+06 | 1,81E+06 | 2,27E+06 | 6,63E+04 | 2,17E+05 | 1,27E+06 | 11       | 11 | 7  | 12 | 9  | 0  | 8  | 11 | 13 | 5  | 4  | 2  | 9         | Phosphory | 22456       |        |
| TG01       | Transport Q58RA6 TG01_HUMAN           | 129.05 | 5  | 5  | 1  | 4  | 8  | 6  | 4  | 1  | 1  | 1        | 1        | 1,94E+06 | 5,04E+06 | 4,63E+06 | 0        | 2,65E+06 | 1,35E+07 | 6,66E+06 | 8,92E+04 | 1,00E+05 | 1,19E+06 | 18       | 18 | 8  | 14 | 8  | 2  | 7  | 19 | 18 | 7  | 3  | 1  | 0         | 0         | Phosphory   | 213700 |
| GOR2       | Golgi reccs Q9Y8H4 GOR2_HUMAN         | 128.53 | 5  | 18 | 13 | 4  | 13 | 13 | 18 | 4  | 4  | 7        | 4        | 4,07E+05 | 3,76E+06 | 4,44E+06 | 2,91E+05 | 1,16E+07 | 1,30E+07 | 5,91E+06 | 1,64E+06 | 3,06E+06 | 6,69E+04 | 5        | 5  | 3  | 10 | 8  | 1  | 5  | 15 | 11 | 12 | 3  | 1  | 2         | 1         | Oxidation ( | 47145  |
| H3B3E3     | H3B3E3 tr H3B3E3 H3B3E3_HUMA          | 128.5  | 20 | 20 | 0  | 0  | 20 | 20 | 20 | 0  | 0  | 0        | 0        | 3,90E+06 | 6,98E+06 | 7,93E+06 | 1,48E+06 | 2,77E+06 | 1,66E+07 | 3,29E+06 | 4,41E+06 | 1,03E+06 | 1,13E+07 | 13       | 13 | 15 | 15 | 14 | 12 | 7  | 12 | 11 | 12 | 1  | 0  | 1         | 1         | Deamidat    | 17130  |
| H3B4V1     | Chavase a tr H3B4V1 H3B4V1_HU         | 128.5  | 42 | 42 | 0  | 0  | 42 | 42 | 42 | 0  | 0  | 0        | 0        | 3,90E+06 | 6,98E+06 | 7,93E+06 | 1,48E+06 | 2,77E+06 | 1,66E+07 | 3,29E+06 | 4,41E+06 | 1,03E+06 | 1,13E+07 | 13       | 13 | 15 | 15 | 14 | 12 | 7  | 12 | 11 | 12 | 1  | 0  | 1         | 1         | Mutation    | 18093  |
| GSGL1      | Golgi appa Q92896 GSGL1_HUMAN         | 128.46 | 7  | 8  | 7  | 1  | 3  | 6  | 8  | 3  | 1  | 1        | 1        | 5,10E+07 | 2,80E+07 | 1,93E+07 | 1,96E+06 | 1,34E+07 | 2,96E+07 | 2,96E+07 | 6,85E+06 | 3,32E+06 | 2,02E+06 | 1,12E+07 | 16 | 16 | 19 | 22 | 24 | 3  | 7  | 18 | 22 | 6  | 4  | 3         | 16        | Beta-meth   | 143552 |
| PSMD3      | 26S protea Q43242 PSMD3_HUMAN         | 128.31 | 15 | 16 | 13 | 0  | 4  | 21 | 23 | 16 | 8  | 2        | 8        | 7,20E+06 | 1,59E+07 | 1,50E+07 | 1,38E+06 | 1,97E+07 | 2,87E+07 | 1,07E+07 | 1,94E+06 | 0        | 2,88E+06 | 13       | 15 | 19 | 19 | 28 | 0  | 6  | 28 | 34 | 24 | 8  | 1  | 11        | Deamidat  | 60978       |        |
| H3B510     | Beta-hexos tr H3B510 H3B510_HU        | 128.3  | 9  | 14 | 14 | 10 | 8  | 17 | 16 | 9  | 14 | 5        | 17       | 3,68E+06 | 9,27E+06 | 5,29E+06 | 1,61E+06 | 2,77E+06 | 1,36E+07 | 1,66E+07 | 3,29E+06 | 4,41E+06 | 1,03E+06 | 1,13E+07 | 13 | 15 | 15 | 19 | 22 | 18 | 10 | 13 | 10 | 13 | 10 | 13        | 1         |             |        |

|             |                                    |        |    |    |    |    |    |    |    |    |    |    |    |          |          |            |          |          |          |          |          |          |          |          |          |    |    |    |    |    |    |    |    |    |           |           |           |           |           |       |
|-------------|------------------------------------|--------|----|----|----|----|----|----|----|----|----|----|----|----------|----------|------------|----------|----------|----------|----------|----------|----------|----------|----------|----------|----|----|----|----|----|----|----|----|----|-----------|-----------|-----------|-----------|-----------|-------|
| ICAM1       | Interleukin P05362 ICAM1_HUMAN     | 124,74 | 0  | 3  | 0  | 0  | 3  | 11 | 13 | 9  | 3  | 3  | 3  | 7,36E+04 | 0        | 1,02E+07   | 9,23E+06 | 3,08E+06 | 1,16E+05 | 0        | 9,03E+04 | 8        | 8        | 0        | 1        | 0  | 0  | 1  | 13 | 12 | 6  | 2  | 1  | 2  | Deamidat  | 57825     |           |           |           |       |
| RBM8A       | RNA-bindin QY9559 RBM8A_HUMAN      | 124,7  | 22 | 40 | 35 | 0  | 15 | 40 | 40 | 35 | 15 | 0  | 36 | 6,10E+06 | 7,33E+06 | 6,91E+06   | 3,44E+05 | 8,35E+06 | 1,30E+07 | 3,57E+06 | 4,02E+05 | 4,99E+05 | 7        | 7        | 7        | 7  | 4  | 0  | 2  | 11 | 8  | 4  | 1  | 0  | 4         | Deamidat  | 19889     |           |           |       |
| SMR2C       | SWI/SNF c Q8T42Q SMR2C_HUMAN       | 124,51 | 8  | 7  | 6  | 0  | 1  | 10 | 5  | 6  | 1  | 0  | 5  | 2,64E+06 | 4,56E+06 | 3,70E+06   | 0        | 4,47E+06 | 3,96E+06 | 2,69E+06 | 1,90E+05 | 5,48E+05 | 13       | 12       | 8        | 17 | 10 | 1  | 16 | 8  | 6  | 2  | 0  | 5  | Phosphory | 132879    |           |           |           |       |
| FRYXC       | SH2-PTB v1 FRYXC FRYXC_HUMAN       | 124,51 | 8  | 7  | 5  | 6  | 1  | 10 | 5  | 6  | 1  | 0  | 5  | 2,64E+06 | 4,56E+06 | 3,70E+06   | 0        | 4,47E+06 | 3,96E+06 | 2,69E+06 | 1,90E+05 | 5,48E+05 | 13       | 12       | 8        | 17 | 10 | 1  | 16 | 8  | 6  | 2  | 0  | 5  | Phosphory | 132879    |           |           |           |       |
| CDV3        | Protein CD Q9UKY7 CDV3_HUMAN       | 124,33 | 38 | 41 | 38 | 0  | 0  | 38 | 41 | 38 | 0  | 0  | 0  | 1,75E+06 | 5,39E+06 | 2,09E+06   | 0        | 2,06E+06 | 5,95E+06 | 2,51E+06 | 0        | 8        | 8        | 6        | 13       | 7  | 0  | 0  | 7  | 13 | 6  | 0  | 0  | 0  | 0         | Oxidation | 27335     |           |           |       |
| PP12C       | Protein pp1 Q9BLZ4 PP12C_HUMAN     | 124,13 | 12 | 8  | 10 | 1  | 4  | 13 | 8  | 1  | 0  | 0  | 3  | 5,49E+05 | 1,21E+06 | 8,02E+05   | 0        | 1,77E+05 | 1,08E+06 | 8,28E+05 | 5,56E+05 | 0        | 15       | 14       | 9        | 8  | 8  | 1  | 3  | 12 | 11 | 8  | 2  | 0  | 2         | Beta-meth | 84881     |           |           |       |
| KTEL1       | Protein phi1 KTEL1 KTEL1_HU        | 124,13 | 11 | 8  | 11 | 1  | 4  | 14 | 11 | 9  | 3  | 0  | 3  | 5,49E+05 | 1,21E+06 | 8,02E+05   | 0        | 1,77E+05 | 1,31E+06 | 1,08E+06 | 8,28E+05 | 6,18E+05 | 0        | 15       | 14       | 8  | 8  | 1  | 3  | 12 | 11 | 8  | 3  | 0  | 2         | Beta-meth | 80319     |           |           |       |
| MPPA        | Mitochondr Q10131 MPPA_HUMAN       | 123,93 | 9  | 17 | 11 | 2  | 11 | 15 | 11 | 4  | 6  | 6  | 11 | 3,31E+06 | 4,15E+06 | 3,44E+06   | 1,23E+05 | 1,03E+06 | 5,14E+06 | 3,99E+06 | 1,30E+06 | 6,77E+05 | 2,80E+05 | 3,24E+06 | 6        | 6  | 7  | 11 | 8  | 1  | 6  | 9  | 8  | 5  | 5         | 7         | Deamidat  | 58253     |           |       |
| ESR27       | Voltage-de v1 ESR27 ESR27_HU       | 123,92 | 39 | 33 | 13 | 12 | 22 | 29 | 18 | 13 | 22 | 19 | 29 | 1,21E+06 | 1,32E+06 | 7,45E+05   | 0        | 2,13E+06 | 2,28E+06 | 2,28E+06 | 0        | 1,14E+06 | 12       | 10       | 12       | 2  | 5  | 11 | 18 | 5  | 2  | 7  | 2  | 4  | Phosphory | 123279    |           |           |           |       |
| ENPL        | Putative e Q58F31 ENPL_HUMAN       | 123,91 | 20 | 11 | 8  | 11 | 13 | 13 | 11 | 13 | 13 | 13 | 0  | 0        | 0        | 0          | 0        | 0        | 0        | 0        | 0        | 0        | 1        | 30       | 32       | 25 | 28 | 37 | 43 | 32 | 27 | 36 | 34 | 43 | Beta-meth | 45859     |           |           |           |       |
| ADA07P0965  | DNA dama tr ADA07P0965 ADA07P      | 123,77 | 6  | 7  | 7  | 1  | 3  | 9  | 11 | 5  | 2  | 1  | 2  | 1,95E+06 | 2,76E+06 | 4,44E+06   | 9,85E+04 | 5,47E+05 | 3,08E+06 | 5,92E+06 | 8,49E+05 | 6,55E+05 | 2,13E+05 | 1,10E+06 | 10       | 10 | 8  | 10 | 12 | 2  | 5  | 11 | 18 | 5  | 6         | 2         | 4         | Phosphory | 118093    |       |
| ADA07P0970  | DNA dama tr ADA07P0970 ADA07P      | 123,77 | 7  | 6  | 8  | 1  | 3  | 9  | 11 | 5  | 2  | 1  | 2  | 1,95E+06 | 2,76E+06 | 4,44E+06   | 9,85E+04 | 5,47E+05 | 3,08E+06 | 5,92E+06 | 8,49E+05 | 6,55E+05 | 2,13E+05 | 1,10E+06 | 11       | 11 | 10 | 10 | 13 | 2  | 5  | 11 | 18 | 5  | 6         | 2         | 4         | Phosphory | 118446    |       |
| ADA07P0978  | DNA dama tr ADA07P0978 ADA07P      | 123,77 | 7  | 6  | 8  | 1  | 3  | 9  | 11 | 5  | 2  | 1  | 2  | 1,95E+06 | 2,76E+06 | 4,44E+06   | 9,85E+04 | 5,47E+05 | 3,08E+06 | 5,92E+06 | 8,49E+05 | 6,55E+05 | 2,13E+05 | 1,10E+06 | 10       | 10 | 10 | 12 | 2  | 5  | 11 | 18 | 5  | 6  | 2         | 4         | Phosphory | 123279    |           |       |
| DBR1        | DNA DAM Q16531 DBR1_HUMAN          | 123,77 | 6  | 5  | 7  | 1  | 3  | 8  | 10 | 4  | 2  | 1  | 2  | 1,95E+06 | 2,76E+06 | 4,44E+06   | 9,85E+04 | 5,47E+05 | 3,08E+06 | 5,92E+06 | 8,49E+05 | 6,55E+05 | 2,13E+05 | 1,10E+06 | 11       | 11 | 8  | 10 | 13 | 2  | 5  | 11 | 18 | 5  | 6         | 2         | 4         | Phosphory | 126668    |       |
| ADA07P09730 | DNA dama tr ADA07P09730 ADA07P     | 123,77 | 7  | 6  | 8  | 1  | 3  | 9  | 10 | 5  | 2  | 1  | 2  | 1,95E+06 | 2,76E+06 | 4,44E+06   | 9,85E+04 | 5,47E+05 | 3,08E+06 | 5,92E+06 | 8,49E+05 | 6,55E+05 | 2,13E+05 | 1,10E+06 | 10       | 10 | 8  | 10 | 13 | 2  | 5  | 11 | 16 | 5  | 6         | 2         | 4         | Phosphory | 114124    |       |
| COX5A       | Cytochrom P20674 COX5A_HUMAN       | 123,72 | 47 | 37 | 37 | 25 | 42 | 47 | 39 | 37 | 32 | 32 | 37 | 5,90E+07 | 4,70E+07 | 4,10E+07   | 9,10E+06 | 4,31E+07 | 5,09E+07 | 2,22E+07 | 1,26E+07 | 1,38E+07 | 2,60E+07 | 9        | 9        | 21 | 14 | 13 | 6  | 13 | 21 | 13 | 9  | 10 | 15        | 12        | Phosphory | 16762     |           |       |
| NDU53       | NAIDH deH Q02539 NDU53_HUMAN       | 123,69 | 31 | 31 | 31 | 12 | 19 | 31 | 31 | 19 | 27 | 19 | 26 | 7,44E+06 | 1,39E+07 | 7,79E+06   | 3,18E+05 | 2,45E+06 | 1,35E+07 | 1,15E+07 | 2,17E+06 | 1,97E+06 | 5,63E+05 | 5,99E+06 | 10       | 10 | 16 | 21 | 22 | 5  | 11 | 21 | 22 | 10 | 13        | 7         | 20        | Deamidat  | 30242     |       |
| AHD9A       | Palmitoyl Q09U11 AHD9A_HUMF        | 123,24 | 19 | 12 | 7  | 10 | 12 | 7  | 9  | 12 | 7  | 7  | 7  | 2,56E+08 | 1,01E+09 | 3,21E+06   | 0        | 3,90E+05 | 3,71E+06 | 2,58E+06 | 3,44E+08 | 5,72E+05 | 2,19E+05 | 1,08E+06 | 5        | 5  | 9  | 7  | 5  | 1  | 2  | 4  | 2  | 3  | 3         | 3         | Deamidat  | 33933     |           |       |
| TC2P        | T-complex P40227 TC2P_HUMAN        | 122,93 | 11 | 16 | 18 | 2  | 2  | 14 | 17 | 6  | 13 | 2  | 5  | 2,44E+07 | 1,93E+07 | 2,41E+07   | 0        | 1,70E+05 | 2,86E+07 | 2,21E+07 | 3,38E+06 | 7,59E+05 | 5,45E+05 | 1,08E+06 | 15       | 15 | 14 | 18 | 19 | 1  | 3  | 17 | 18 | 11 | 3         | 1         | 6         | Deamidat  | 58024     |       |
| RS18        | 40S ribosom P62269 RS18_HUMAN      | 122,92 | 34 | 34 | 34 | 16 | 22 | 34 | 34 | 34 | 8  | 8  | 8  | 5,67E+07 | 9,99E+07 | 8,34E+07   | 1,08E+06 | 1,12E+06 | 1,04E+08 | 1,92E+08 | 5,68E+07 | 1,51E+06 | 1,37E+06 | 3,18E+06 | 9        | 9  | 24 | 24 | 26 | 3  | 7  | 21 | 28 | 28 | 3         | 5         | 5         | Deamidat  | 17719     |       |
| TRAM1       | Translocati Q15629 TRAM1_HUMF      | 122,87 | 12 | 12 | 12 | 0  | 12 | 12 | 12 | 0  | 3  | 3  | 3  | 1,79E+07 | 1,29E+07 | 9,86E+06   | 0        | 1,16E+07 | 1,10E+07 | 1,08E+07 | 0        | 0        | 0        | 0        | 6        | 6  | 20 | 13 | 9  | 0  | 6  | 16 | 13 | 13 | 0         | 1         | 1         | Deamidat  | 43072     |       |
| G3XN4       | Translocati tr G3XN4 G3XN4_HU      | 122,87 | 16 | 16 | 16 | 0  | 16 | 16 | 16 | 0  | 4  | 4  | 4  | 1,79E+07 | 1,29E+07 | 9,86E+06   | 0        | 1,16E+07 | 1,10E+07 | 1,08E+07 | 0        | 0        | 0        | 0        | 6        | 6  | 20 | 13 | 9  | 0  | 6  | 16 | 13 | 13 | 0         | 1         | 1         | Deamidat  | 33435     |       |
| BDKRY1      | Cysteine-ri tr BDKRY1 BDKRY1_HU    | 122,85 | 9  | 12 | 10 | 0  | 8  | 12 | 7  | 2  | 3  | 0  | 0  | 5,25E+05 | 5,46E+06 | 2,15E+06   | 0        | 3,87E+06 | 7,11E+06 | 3,31E+06 | 3,46E+04 | 0        | 11       | 11       | 6        | 14 | 16 | 0  | 0  | 10 | 24 | 9  | 1  | 1  | 0         | Phosphory | 84278     |           |           |       |
| SYCC        | Cysteine-ri P49589 SYCC_HUMAN      | 122,85 | 9  | 11 | 10 | 0  | 8  | 11 | 7  | 2  | 3  | 0  | 0  | 5,25E+05 | 5,46E+06 | 2,15E+06   | 0        | 3,87E+06 | 7,11E+06 | 3,31E+06 | 3,46E+04 | 0        | 11       | 11       | 6        | 14 | 16 | 0  | 0  | 10 | 24 | 9  | 1  | 1  | 0         | Phosphory | 85473     |           |           |       |
| COA1        | Collagen a1 P02462 COA1_HUMAN      | 122,73 | 5  | 5  | 3  | 1  | 2  | 6  | 4  | 1  | 2  | 6  | 3  | 2,22E+06 | 4,34E+06 | 1,84E+06   | 0        | 9,05E+06 | 8,49E+06 | 3,04E+06 | 3,02E+06 | 6,39E+06 | 1,26E+05 | 13       | 13       | 10 | 10 | 7  | 1  | 2  | 15 | 16 | 12 | 1  | 2         | 4         | Phosphory | 160611    |           |       |
| H11         | Histone H1 Q02539 H1_HUMAN         | 122,56 | 17 | 12 | 6  | 7  | 17 | 7  | 7  | 6  | 7  | 5  | 5  | 0        | 0        | 0          | 1,23E+05 | 0        | 0        | 0        | 0        | 0        | 0        | 0        | 2        | 21 | 18 | 6  | 5  | 22 | 15 | 10 | 8  | 2  | 8         | Ubiquitin | 21842     |           |           |       |
| PS150       | Protein P150 PS150_HUMAN           | 122,51 | 31 | 25 | 20 | 12 | 20 | 22 | 22 | 12 | 22 | 12 | 12 | 3,42E+07 | 6,09E+07 | 4,95E+07   | 1,31E+06 | 9,97E+06 | 7,80E+06 | 9,40E+07 | 2,85E+07 | 1,02E+07 | 4,52E+06 | 1,33E+07 | 10       | 9  | 16 | 10 | 15 | 10 | 15 | 12 | 12 | 8  | 9         | 16        | 9         | Ubiquitin | 16760     |       |
| IFAK3       | Eskaryote P38919 IFAK3_HUMAN       | 122,38 | 22 | 12 | 15 | 2  | 18 | 22 | 24 | 13 | 3  | 6  | 8  | 8,83E+06 | 4,77E+06 | 4,24E+06   | 1,20E+05 | 1,32E+06 | 7,98E+06 | 5,85E+06 | 3,34E+06 | 3,48E+05 | 0        | 8        | 12       | 10 | 14 | 17 | 15 | 2  | 10 | 17 | 14 | 10 | 2         | 2         | 4         | Deamidat  | 44871     |       |
| IL3LH2      | RNA helica tr IL3LH2 IL3LH2_HUM    | 122,38 | 23 | 12 | 16 | 2  | 19 | 23 | 23 | 14 | 6  | 6  | 8  | 8,83E+06 | 4,77E+06 | 4,24E+06   | 1,20E+05 | 1,32E+06 | 7,98E+06 | 5,85E+06 | 3,34E+06 | 3,48E+05 | 0        | 8        | 12       | 10 | 14 | 17 | 15 | 2  | 10 | 17 | 13 | 10 | 2         | 2         | 4         | Deamidat  | 44521     |       |
| PSA3        | Protein P25788 PSA3_HUMAN          | 122,37 | 24 | 20 | 30 | 16 | 19 | 20 | 20 | 20 | 19 | 12 | 25 | 1,69E+06 | 2,97E+06 | 6,58E+06   | 3,82E+05 | 2,60E+06 | 3,81E+06 | 3,38E+06 | 1,30E+06 | 1,63E+05 | 7,27E+05 | 2,01E+06 | 9        | 9  | 8  | 9  | 14 | 5  | 14 | 9  | 10 | 14 | 5         | 3         | 10        | Deamidat  | 28433     |       |
| GFAP        | Glia fibril P14136 GFAP_HUMAN      | 122,35 | 13 | 16 | 13 | 10 | 11 | 10 | 16 | 11 | 15 | 15 | 15 | 1,23E+08 | 2,61E+06 | 3,17E+06   | 4,50E+07 | 6,50E+06 | 3,46E+06 | 0        | 7,85E+07 | 6,77E+07 | 0        | 2,74E+07 | 1,27E+08 | 25 | 9  | 67 | 61 | 58 | 51 | 59 | 52 | 61 | 46        | 49        | 63        | 63        | Phosphory | 49880 |
| ADA1575R83  | Glia fibril tr ADA1575R83 ADA1575R | 122,28 | 12 | 14 | 12 | 10 | 10 | 14 | 14 | 10 | 14 | 14 | 14 | 1,23E+08 | 2,61E+06 | 3,17E+06   | 4,50E+07 | 6,50E+06 | 3,46E+06 | 0        | 7,85E+07 | 6,77E+07 | 0        | 2,74E+07 | 1,27E+08 | 25 | 9  | 67 | 61 | 58 | 51 | 59 | 52 | 61 | 46        | 49        | 63        | 63        | Phosphory | 54244 |
| ADA1W2P46   | Glia fibril tr ADA1W2P46 ADA1      | 122,35 | 11 | 13 | 11 | 9  | 9  | 9  | 9  | 14 | 9  | 13 | 13 | 1,23E+08 | 2,61E+06 | 3,17E+06</ |          |          |          |          |          |          |          |          |          |    |    |    |    |    |    |    |    |    |           |           |           |           |           |       |



|             |                                    |        |    |    |    |    |    |    |    |    |    |    |          |           |          |          |          |          |          |          |          |          |          |          |          |    |    |    |    |    |    |    |    |    |    |          |           |           |          |           |        |
|-------------|------------------------------------|--------|----|----|----|----|----|----|----|----|----|----|----------|-----------|----------|----------|----------|----------|----------|----------|----------|----------|----------|----------|----------|----|----|----|----|----|----|----|----|----|----|----------|-----------|-----------|----------|-----------|--------|
| P585        | Proteasom P28074 P585_HUMAN        | 116,7  | 10 | 15 | 15 | 5  | 10 | 15 | 26 | 15 | 10 | 5  | 15       | 4,92E+06  | 9,11E+06 | 6,30E+06 | 0        | 1,58E+06 | 1,22E+07 | 2,75E+07 | 7,08E+06 | 0        | 9,79E+05 | 2,68E+06 | 10       | 10 | 10 | 12 | 11 | 1  | 5  | 13 | 26 | 12 | 2  | 3        | 9         | Deamidat  | 28480    |           |        |
| H2AZ        | Histone H2 POC055 H2AZ_HUMAN       | 116,69 | 31 | 31 | 31 | 12 | 20 | 31 | 31 | 31 | 12 | 20 | 20       | 5,68E+07  | 7,06E+07 | 5,91E+07 | 0        | 7,54E+05 | 9,01E+07 | 5,33E+07 | 2,59E+07 | 0        | 6,09E+05 | 2,80E+05 | 9        | 3  | 48 | 36 | 35 | 8  | 12 | 39 | 34 | 34 | 12 | 18       | 11        | Deamidat  | 13553    |           |        |
| H2A         | Histone H2 Q11591 H2AV_HUMAN       | 116,69 | 31 | 31 | 31 | 12 | 20 | 31 | 31 | 31 | 12 | 20 | 20       | 5,68E+07  | 7,06E+07 | 5,91E+07 | 0        | 7,54E+05 | 9,01E+07 | 5,33E+07 | 2,59E+07 | 0        | 6,09E+05 | 2,80E+05 | 9        | 3  | 48 | 36 | 35 | 8  | 12 | 39 | 34 | 34 | 12 | 18       | 11        | Deamidat  | 13509    |           |        |
| H2B96       | Histone H2 Q11591 H2B96_HUMAN      | 116,65 | 2  | 1  | 1  | 0  | 1  | 9  | 11 | 9  | 11 | 0  | 7        | 7,83E+06  | 2,28E+06 | 3,19E+06 | 0        | 3,29E+05 | 9,01E+07 | 5,33E+07 | 2,59E+07 | 1,41E+05 | 6,09E+05 | 2,37E+06 | 13       | 13 | 3  | 15 | 9  | 0  | 3  | 13 | 15 | 4  | 0  | 0        | 12        | Mutation  | 101290   |           |        |
| MYO1D       | Unconvect 094832 MYO1D_HUMAN       | 116,55 | 2  | 10 | 7  | 0  | 1  | 10 | 12 | 6  | 2  | 0  | 7        | 7,83E+04  | 2,38E+06 | 3,19E+06 | 0        | 3,29E+05 | 4,64E+06 | 3,85E+06 | 8,97E+05 | 1,41E+05 | 2,37E+06 | 14       | 14       | 3  | 15 | 9  | 0  | 3  | 14 | 18 | 6  | 4  | 0  | 0        | 12        | Beta-meth | 116202   |           |        |
| DEST        | Destrin OS P60981 DEST_HUMAN       | 116,14 | 24 | 24 | 20 | 0  | 5  | 7  | 24 | 7  | 0  | 0  | 0        | 7         | 1,21E+06 | 2,59E+06 | 4,94E+06 | 0        | 3,89E+05 | 1,60E+06 | 4,01E+06 | 7,74E+05 | 0        | 0        | 7        | 7  | 6  | 6  | 6  | 0  | 1  | 2  | 11 | 3  | 0  | 0        | 1         | Beta-meth | 18506    |           |        |
| SRFS        | Serine Arg P84103 SRFS_HUMAN       | 115,8  | 22 | 22 | 28 | 0  | 0  | 22 | 22 | 22 | 0  | 0  | 0        | 1,67E+07  | 2,38E+06 | 1,02E+07 | 0        | 1,36E+06 | 1,18E+07 | 3,55E+06 | 0        | 0        | 0        | 0        | 6        | 3  | 20 | 11 | 15 | 0  | 0  | 14 | 11 | 0  | 0  | 0        | 0         | 0         | Deamidat | 19330     |        |
| ADAG87XZD0  | Serine Arg tr ADAG87XZD0 ADAG8     | 115,8  | 28 | 38 | 38 | 0  | 0  | 38 | 38 | 38 | 0  | 0  | 0        | 1,67E+07  | 2,38E+06 | 9,55E+06 | 0        | 1,36E+06 | 1,18E+07 | 3,55E+06 | 0        | 0        | 0        | 0        | 6        | 2  | 20 | 11 | 14 | 0  | 0  | 15 | 14 | 11 | 0  | 0        | 0         | 0         | Deamidat | 10321     |        |
| PRDX1       | Probable p Q09430 PRDX1_HUMAN      | 115,76 | 44 | 47 | 47 | 0  | 0  | 47 | 47 | 47 | 0  | 0  | 23       | 2,74E+07  | 5,83E+07 | 6,28E+07 | 5,51E+06 | 5,91E+06 | 5,00E+07 | 6,28E+07 | 7,03E+06 | 2,37E+06 | 1,21E+07 | 15       | 16       | 16 | 16 | 16 | 16 | 16 | 16 | 16 | 16 | 16 | 16 | 16       | 16        | 16        | 16       | 16        | 16     |
| CD3C7       | Hsp90 co-Q16543 CD3C7_HUMAN        | 115,67 | 7  | 13 | 13 | 0  | 0  | 13 | 13 | 13 | 0  | 0  | 0        | 1,75E+06  | 7,46E+06 | 5,66E+06 | 0        | 7,52E+06 | 1,54E+07 | 3,09E+06 | 0        | 0        | 0        | 0        | 5        | 5  | 6  | 7  | 13 | 0  | 0  | 13 | 10 | 8  | 0  | 0        | 0         | 0         | Deamidat | 44668     |        |
| Q5VVC8      | 60S ribosom tr Q5VVC8 Q5VVC8_HUMAN | 115,6  | 19 | 19 | 0  | 5  | 19 | 14 | 5  | 5  | 5  | 19 | 19       | 5         | 1,54E+07 | 1,60E+07 | 1,48E+07 | 0        | 4,98E+05 | 1,87E+07 | 2,06E+07 | 6,29E+06 | 4,14E+05 | 0        | 5,66E+05 | 7  | 7  | 12 | 11 | 0  | 3  | 12 | 15 | 8  | 3  | 1        | 3         | Deamidat  | 19024    |           |        |
| RL16        | 60S ribosom P62913 RL16_HUMAN      | 115,6  | 17 | 17 | 0  | 5  | 17 | 10 | 5  | 5  | 17 | 17 | 0        | 5         | 1,54E+07 | 1,60E+07 | 1,48E+07 | 0        | 4,98E+05 | 1,87E+07 | 2,06E+07 | 6,29E+06 | 4,14E+05 | 0        | 5,66E+05 | 7  | 7  | 12 | 11 | 0  | 3  | 12 | 15 | 8  | 3  | 1        | 3         | Deamidat  | 20752    |           |        |
| SCM         | Probable p Q09477 SCM_HUMAN        | 115,6  | 3  | 6  | 3  | 0  | 3  | 6  | 8  | 3  | 0  | 0  | 3        | 1,69E+06  | 3,38E+06 | 2,67E+06 | 0        | 4,49E+05 | 4,43E+06 | 3,60E+06 | 1,22E+06 | 2,98E+05 | 4,63E+05 | 5        | 5        | 2  | 5  | 3  | 0  | 3  | 0  | 2  | 4  | 0  | 0  | 4        | Deamidat  | 62224     |          |           |        |
| QC22        | Cytoschem P07919 QC22_HUMAN        | 115,41 | 20 | 41 | 20 | 20 | 20 | 20 | 20 | 20 | 20 | 20 | 0        | 2,57E+06  | 8,83E+06 | 6,60E+06 | 2,93E+05 | 3,77E+06 | 1,23E+07 | 1,09E+07 | 4,41E+06 | 7,82E+05 | 3,10E+06 | 2,28E+06 | 12       | 12 | 9  | 12 | 10 | 2  | 10 | 26 | 10 | 6  | 3  | 4        | 0         | 0         | 10       | Beta-meth | 10329  |
| EPN4        | Clathrin tr Q14677 EPN4_HUMAN      | 115,07 | 13 | 13 | 0  | 0  | 17 | 17 | 0  | 0  | 0  | 0  | 0        | 2,32E+06  | 1,63E+07 | 5,65E+06 | 0        | 1,32E+07 | 1,56E+07 | 6,02E+06 | 0        | 0        | 0        | 0        | 10       | 10 | 9  | 22 | 11 | 0  | 0  | 18 | 17 | 15 | 0  | 0        | 0         | 0         | Deamidat | 68259     |        |
| MTCH2       | Mitochcond Q9Y6C0 MTCH2_HUMAN      | 114,96 | 25 | 28 | 0  | 21 | 27 | 30 | 15 | 0  | 4  | 24 | 19E+07   | 1,86E+07  | 1,16E+07 | 0        | 6,26E+06 | 1,89E+07 | 2,02E+07 | 3,36E+06 | 0        | 2,14E+05 | 5,12E+06 | 9        | 9        | 12 | 10 | 7  | 0  | 6  | 13 | 13 | 5  | 0  | 1  | 12       | Phosphory | 33331     |          |           |        |
| J3KQ48      | Aminoacyl tr J3KQ48 J3KQ48_HUMAN   | 114,9  | 32 | 23 | 23 | 0  | 11 | 23 | 23 | 23 | 0  | 11 | 11       | 4,66E+06  | 4,44E+06 | 4,20E+06 | 0        | 4,49E+05 | 5,44E+06 | 7,85E+06 | 2,19E+06 | 5,87E+05 | 9,26E+05 | 4        | 4        | 4  | 5  | 5  | 0  | 1  | 8  | 14 | 3  | 0  | 1  | 1        | Mutation  | 19325     |          |           |        |
| PTF2        | Peptidyl-H Q09351 PTF2_HUMAN       | 114,9  | 32 | 23 | 0  | 11 | 23 | 32 | 23 | 0  | 11 | 11 | 4,66E+06 | 4,44E+06  | 4,20E+06 | 0        | 4,49E+05 | 5,44E+06 | 7,85E+06 | 2,19E+06 | 5,87E+05 | 9,26E+05 | 4        | 4        | 4        | 5  | 5  | 0  | 1  | 8  | 14 | 3  | 0  | 1  | 1  | Mutation | 19325     |           |          |           |        |
| AGM1        | Phosphoac AG5394 AGM1_HUMAN        | 114,86 | 2  | 2  | 1  | 0  | 2  | 14 | 2  | 2  | 0  | 0  | 0        | 6,20E+05  | 1,70E+06 | 1,08E+06 | 0        | 1,67E+05 | 1,67E+06 | 9,82E+06 | 8,38E+05 | 2,08E+05 | 0        | 0        | 6        | 6  | 2  | 2  | 2  | 0  | 1  | 2  | 0  | 0  | 0  | 0        | 0         | 0         | Deamidat | 59852     |        |
| GT251       | Procollagen Q8NB51 GT251_HUMAN     | 114,75 | 11 | 17 | 10 | 2  | 6  | 14 | 15 | 8  | 6  | 4  | 9        | 1,94E+06  | 6,80E+06 | 3,06E+06 | 0        | 6,95E+05 | 7,42E+06 | 1,01E+07 | 1,95E+06 | 2,86E+05 | 5,36E+05 | 1,22E+06 | 12       | 12 | 15 | 18 | 13 | 1  | 5  | 17 | 19 | 9  | 5  | 2        | 8         | Deamidat  | 71636    |           |        |
| FAM3C       | Protein FA1 Q92520 FAM3C_HUMAN     | 114,73 | 21 | 15 | 19 | 4  | 4  | 10 | 23 | 4  | 18 | 0  | 0        | 1,67E+06  | 1,01E+06 | 1,89E+06 | 0        | 1,45E+06 | 1,18E+07 | 3,14E+05 | 1,87E+06 | 1,40E+06 | 1,37E+06 | 5        | 5        | 6  | 2  | 3  | 2  | 3  | 2  | 4  | 1  | 5  | 0  | 0        | 0         | 0         | Deamidat | 24680     |        |
| RBM25       | RNA-bindin P49750 RBM25_HUMAN      | 114,44 | 11 | 11 | 8  | 0  | 0  | 13 | 9  | 5  | 0  | 0  | 0        | 7,25E+06  | 6,74E+06 | 5,60E+06 | 0        | 1,60E+07 | 1,14E+07 | 2,37E+06 | 0        | 0        | 0        | 0        | 13       | 13 | 11 | 8  | 8  | 0  | 0  | 17 | 11 | 7  | 0  | 0        | 0         | 0         | 0        | Deamidat  | 100186 |
| ADAG6QBPNC3 | Inverted tr ADAG6QBPNC3 ADAG6      | 114,42 | 6  | 7  | 5  | 1  | 1  | 4  | 5  | 2  | 1  | 0  | 0        | 1,294E+05 | 6,81E+05 | 7,88E+05 | 0        | 1,13E+06 | 6,88E+05 | 1,15E+05 | 0        | 0        | 0        | 0        | 13       | 11 | 6  | 10 | 9  | 1  | 1  | 9  | 7  | 2  | 1  | 0        | 0         | 0         | 0        | Phosphory | 134694 |
| INF2        | Inverted tr Q27181 INF2_HUMAN      | 114,42 | 6  | 7  | 5  | 1  | 1  | 4  | 5  | 2  | 1  | 0  | 0        | 1,294E+05 | 6,81E+05 | 7,88E+05 | 0        | 1,13E+06 | 6,88E+05 | 1,15E+05 | 0        | 0        | 0        | 0        | 13       | 11 | 6  | 10 | 9  | 1  | 1  | 9  | 7  | 2  | 1  | 0        | 0         | 0         | 0        | Phosphory | 135624 |
| ADAG6QBP2   | Inverted tr ADAG6QBP2 ADAG6        | 114,42 | 6  | 7  | 5  | 1  | 1  | 4  | 5  | 2  | 1  | 0  | 0        | 1,294E+05 | 6,81E+05 | 7,88E+05 | 0        | 1,13E+06 | 6,88E+05 | 1,15E+05 | 0        | 0        | 0        | 0        | 13       | 11 | 6  | 10 | 9  | 1  | 1  | 9  | 7  | 2  | 1  | 0        | 0         | 0         | 0        | Phosphory | 135695 |
| ADAG6QBP1   | Inverted tr ADAG6QBP1 ADAG6        | 114,42 | 5  | 7  | 5  | 1  | 1  | 4  | 5  | 2  | 1  | 0  | 0        | 1,294E+05 | 6,81E+05 | 7,88E+05 | 0        | 1,13E+06 | 6,88E+05 | 1,15E+05 | 0        | 0        | 0        | 0        | 13       | 11 | 6  | 10 | 9  | 1  | 1  | 9  | 7  | 2  | 1  | 0        | 0         | 0         | 0        | Phosphory | 136119 |
| ADAG6QBP4   | Inverted tr ADAG6QBP4 ADAG6        | 114,42 | 5  | 7  | 5  | 1  | 1  | 4  | 5  | 2  | 1  | 0  | 0        | 1,294E+05 | 6,81E+05 | 7,88E+05 | 0        | 1,13E+06 | 6,88E+05 | 1,15E+05 | 0        | 0        | 0        | 0        | 13       | 11 | 6  | 10 | 9  | 1  | 1  | 9  | 7  | 2  | 1  | 0        | 0         | 0         | 0        | Phosphory | 136119 |
| ADAG6QBP5   | Inverted tr ADAG6QBP5 ADAG6        | 114,42 | 5  | 7  | 5  | 1  | 1  | 4  | 5  | 2  | 1  | 0  | 0        | 1,294E+05 | 6,81E+05 | 7,88E+05 | 0        | 1,13E+06 | 6,88E+05 | 1,15E+05 | 0        | 0        | 0        | 0        | 13       | 11 | 6  | 10 | 9  | 1  | 1  | 9  | 7  | 2  | 1  | 0        | 0         | 0         | 0        | Phosphory | 136119 |
| ADAG6QBP6   | Inverted tr ADAG6QBP6 ADAG6        | 114,42 | 6  | 8  | 6  | 1  | 0  | 4  | 5  | 3  | 1  | 0  | 0        | 1,83E+05  | 6,81E+05 | 7,08E+05 | 0        | 1,13E+06 | 6,33E+05 | 1,15E+05 | 0        | 0        | 0        | 0        | 11       | 10 | 5  | 8  | 8  | 1  | 0  | 8  | 6  | 2  | 1  | 0        | 0         | 0         | 0        | Phosphory | 107878 |
| ADAD0A0Q1   | Inverted tr ADAD0A0Q1 ADAD         | 114,42 | 8  | 9  | 8  | 2  | 0  | 0  | 3  | 1  | 0  | 0  | 0        | 1,83E+05  | 6,81E+05 | 7,08E+05 | 0        | 1,13E+06 | 6,33E+05 | 1,15E+05 | 0        | 0        | 0        | 0        | 10       | 9  | 5  | 8  | 8  | 1  | 0  | 8  | 6  | 1  | 1  | 0        | 0         | 0         | 0        | Phosphory | 78826  |
| ADAG6QBP8   | Inverted tr ADAG6QBP8 ADAG6        | 114,42 | 9  | 11 | 10 | 2  | 3  | 7  | 8  | 3  | 1  | 0  | 0        | 1,83E+05  | 6,81E+05 | 7,08E+05 | 0        | 1,23E+05 | 1,13E+06 | 3,33E+05 | 1,15E+05 | 0        | 0        | 0        | 10       | 10 | 5  | 8  | 7  | 1  | 1  | 8  | 6  | 1  | 1  | 0        | 0         | 0         | 0        | Phosphory | 66694  |
| PA1B2       | Platelet-act P68402 PA1B2_HUMAN    | 114,37 | 13 | 13 | 26 | 0  | 0  | 8  | 17 | 22 | 0  | 0  | 0        | 7,94E+05  | 1,81E+06 | 1,61E+06 | 0        | 7,78E+05 | 5,99E+06 | 3,53E+05 | 0        | 0        | 0        | 0        | 6        | 6  | 4  | 7  | 10 | 0  | 5  | 8  | 4  | 0  | 0  | 0        | 0         | 0         | Deamidat | 25569     |        |
| SF3B1       | Sarotaxin Q12147 SF3B1_HUMAN       | 114,31 | 3  | 11 | 9  |    |    |    |    |    |    |    |          |           |          |          |          |          |          |          |          |          |          |          |          |    |    |    |    |    |    |    |    |    |    |          |           |           |          |           |        |

|           |                                     |        |    |    |    |    |    |    |    |    |    |    |    |           |          |          |          |          |          |          |          |          |          |          |    |    |    |    |    |    |    |    |    |    |    |            |              |            |            |            |       |
|-----------|-------------------------------------|--------|----|----|----|----|----|----|----|----|----|----|----|-----------|----------|----------|----------|----------|----------|----------|----------|----------|----------|----------|----|----|----|----|----|----|----|----|----|----|----|------------|--------------|------------|------------|------------|-------|
| F5CN1     | Fascin OS1 Q16658 F5CN1_HUMAN       | 109,12 | 9  | 17 | 20 | 0  | 4  | 4  | 19 | 9  | 2  | 5  | 4  | 5,33E+06  | 1,28E+07 | 1,32E+07 | 1,09E+06 | 7,98E+06 | 1,72E+07 | 3,75E+06 | 3,32E+05 | 9,47E+05 | 2,27E+06 | 10       | 10 | 7  | 11 | 13 | 0  | 3  | 4  | 17 | 7  | 2  | 3  | 6          | Lysoine oxid | 54530      |            |            |       |
| CYBR1     | Plasma me Q53TM1 CYBR1_HUMAN        | 109,11 | 14 | 14 | 14 | 8  | 14 | 14 | 14 | 14 | 14 | 14 | 14 | 8,16E+07  | 1,62E+07 | 2,01E+07 | 2,82E+06 | 3,45E+06 | 1,55E+07 | 1,97E+07 | 1,02E+07 | 7,33E+06 | 2,08E+06 | 9,04E+06 | 4  | 4  | 13 | 9  | 16 | 6  | 12 | 9  | 10 | 10 | 9  | 10         | 3            | Phosphoryl | 31649      |            |       |
| RALB      | Ras-related P12334 RALB_HUMAN       | 109,97 | 24 | 20 | 17 | 7  | 20 | 20 | 10 | 7  | 7  | 7  | 7  | 7,64E+05  | 4,12E+06 | 2,70E+06 | 3,25E+05 | 7,00E+06 | 7,13E+06 | 2,24E+06 | 0        | 5,98E+05 | 0        | 5,98E+05 | 4  | 2  | 5  | 7  | 4  | 0  | 2  | 9  | 9  | 3  | 0  | 1          | 3            | Phosphoryl | 45311      |            |       |
| CSQB1     | Small mon C19QB1 CSQB1_HUMAN        | 109,97 | 30 | 15 | 10 | 8  | 25 | 10 | 8  | 8  | 8  | 8  | 8  | 6,45E+05  | 4,12E+06 | 2,70E+06 | 3,25E+05 | 7,00E+06 | 7,13E+06 | 2,24E+06 | 0        | 5,98E+05 | 0        | 5,98E+05 | 10 | 10 | 7  | 11 | 13 | 0  | 2  | 9  | 9  | 5  | 1  | 3          | 3            | Ubiquitin  | 45527      |            |       |
| C9QB3     | Small mon C19QB3 C9QB3_HUMAN        | 109,97 | 29 | 24 | 10 | 8  | 24 | 9  | 0  | 8  | 8  | 8  | 8  | 6,45E+05  | 4,12E+06 | 2,70E+06 | 3,25E+05 | 7,00E+06 | 7,13E+06 | 2,24E+06 | 0        | 5,98E+05 | 0        | 5,98E+05 | 10 | 10 | 7  | 11 | 13 | 0  | 2  | 9  | 9  | 3  | 0  | 1          | 3            | Phosphoryl | 19254      |            |       |
| GAPR1     | Golei-asso G9HG4 GAPR1_HUMAN        | 109,94 | 17 | 17 | 17 | 17 | 17 | 17 | 17 | 17 | 17 | 17 | 17 | 7,44E+06  | 9,42E+06 | 1,04E+07 | 9,01E+05 | 3,55E+06 | 1,54E+07 | 1,63E+07 | 5,83E+06 | 3,60E+06 | 1,07E+06 | 5,04E+06 | 7  | 7  | 6  | 7  | 9  | 5  | 7  | 11 | 7  | 11 | 7  | 8          | 6            | 10         | Phosphoryl | 17218      |       |
| Q5V290    | Golei-asso T105V290 Q5V290_HUMAN    | 109,94 | 23 | 23 | 20 | 20 | 20 | 20 | 20 | 20 | 20 | 20 | 20 | 20,64E+06 | 9,42E+06 | 1,04E+07 | 9,01E+05 | 3,55E+06 | 1,54E+07 | 1,63E+07 | 5,83E+06 | 3,60E+06 | 1,07E+06 | 5,04E+06 | 6  | 6  | 6  | 7  | 8  | 5  | 10 | 7  | 11 | 7  | 11 | 7          | 8            | 6          | 10         | Phosphoryl | 14213 |
| ETV296    | Casein kina T17E296 ETV296_HUMAN    | 108,8  | 12 | 18 | 9  | 6  | 9  | 19 | 19 | 13 | 3  | 0  | 0  | 15,15E+06 | 3,51E+06 | 1,85E+06 | 9,44E+07 | 6,57E+07 | 4,75E+06 | 4,16E+06 | 1,78E+06 | 3,27E+07 | 7,38E+05 | 10       | 10 | 4  | 9  | 8  | 2  | 4  | 16 | 9  | 5  | 1  | 0  | 5          | Ubiquitin    | 45311      |            |            |       |
| CK2L1     | Casein kina P68041 CK2L1_HUMAN      | 108,8  | 12 | 18 | 9  | 6  | 9  | 19 | 19 | 13 | 3  | 0  | 0  | 15,15E+06 | 3,51E+06 | 1,85E+06 | 9,44E+07 | 6,57E+07 | 4,75E+06 | 4,16E+06 | 1,78E+06 | 3,27E+07 | 7,38E+05 | 10       | 10 | 4  | 9  | 8  | 2  | 4  | 16 | 9  | 5  | 1  | 0  | 5          | Ubiquitin    | 45311      |            |            |       |
| ADA28BVS8 | Casein kina T17E296 ADA28BVS8_HUMAN | 108,8  | 12 | 18 | 9  | 6  | 9  | 19 | 19 | 13 | 3  | 0  | 0  | 15,15E+06 | 3,51E+06 | 1,85E+06 | 9,44E+07 | 6,57E+07 | 4,75E+06 | 4,16E+06 | 1,78E+06 | 3,27E+07 | 7,38E+05 | 10       | 10 | 4  | 9  | 8  | 2  | 4  | 16 | 9  | 5  | 1  | 0  | 5          | Ubiquitin    | 44419      |            |            |       |
| ADA28BVS4 | Casein kina T17E296 ADA28BVS4_HUMAN | 108,8  | 12 | 18 | 9  | 6  | 9  | 19 | 19 | 13 | 3  | 0  | 0  | 15,15E+06 | 3,51E+06 | 1,85E+06 | 9,44E+07 | 6,57E+07 | 4,75E+06 | 4,16E+06 | 1,78E+06 | 3,27E+07 | 7,38E+05 | 10       | 10 | 4  | 9  | 8  | 2  | 4  | 16 | 9  | 5  | 1  | 0  | 5          | Ubiquitin    | 40718      |            |            |       |
| ADA28BVS2 | Casein kina T17E296 ADA28BVS2_HUMAN | 108,8  | 13 | 19 | 9  | 4  | 7  | 20 | 20 | 14 | 0  | 0  | 0  | 16,15E+06 | 3,51E+06 | 1,85E+06 | 8,56E+04 | 1,54E+05 | 4,75E+06 | 4,16E+06 | 1,78E+06 | 0        | 7,38E+05 | 9        | 9  | 4  | 9  | 8  | 1  | 2  | 16 | 9  | 5  | 0  | 0  | 5          | Ubiquitin    | 43186      |            |            |       |
| ADA28BVS1 | Casein kina T17E296 ADA28BVS1_HUMAN | 108,8  | 13 | 19 | 9  | 4  | 7  | 20 | 20 | 14 | 0  | 0  | 0  | 16,15E+06 | 3,51E+06 | 1,85E+06 | 8,56E+04 | 1,54E+05 | 4,75E+06 | 4,16E+06 | 1,78E+06 | 0        | 7,38E+05 | 9        | 9  | 4  | 9  | 8  | 1  | 2  | 16 | 9  | 5  | 0  | 0  | 5          | Ubiquitin    | 43186      |            |            |       |
| IL13P1    | Mitochond T1L13P1 IL13P1_HUMAN      | 108,8  | 23 | 23 | 11 | 5  | 19 | 8  | 11 | 8  | 5  | 10 | 8  | 8,22E+07  | 1,19E+07 | 9,48E+06 | 2,24E+06 | 1,54E+06 | 1,26E+07 | 1,23E+07 | 4,07E+06 | 3,70E+06 | 4,28E+06 | 1,72E+06 | 10 | 10 | 7  | 12 | 4  | 6  | 7  | 5  | 5  | 5  | 5  | 5          | 6            | 6          | Beta-meth  | 32182      |       |
| M2OM      | Mitochond Q02978 M2OM_HUMAN         | 108,8  | 21 | 22 | 10 | 5  | 18 | 8  | 10 | 7  | 5  | 10 | 8  | 8,22E+07  | 1,19E+07 | 9,48E+06 | 2,24E+06 | 1,54E+06 | 1,26E+07 | 1,23E+07 | 4,07E+06 | 3,70E+06 | 4,28E+06 | 1,72E+06 | 11 | 11 | 7  | 12 | 7  | 4  | 6  | 7  | 5  | 5  | 5  | 5          | 6            | Beta-meth  | 34062      |            |       |
| ATX2L     | Ataxin-2-III Q8WWM7 ATX2L_HUMAN     | 108,63 | 5  | 8  | 9  | 0  | 0  | 5  | 9  | 7  | 0  | 0  | 0  | 2,29E+06  | 4,04E+06 | 5,42E+06 | 6,99E+06 | 8,83E+06 | 3,41E+06 | 0        | 0        | 0        | 0        | 6        | 6  | 12 | 10 | 0  | 6  | 10 | 5  | 0  | 0  | 0  | 0  | 0          | 0            | 6          | Beta-meth  | 113374     |       |
| ETEP74    | NADH deH T1E7E74 ETEP74_HUMAN       | 108,59 | 21 | 21 | 21 | 13 | 13 | 21 | 21 | 21 | 8  | 14 | 21 | 7,01E+06  | 7,19E+06 | 5,59E+06 | 5,01E+05 | 2,48E+06 | 9,36E+06 | 7,51E+06 | 1,98E+06 | 2,50E+06 | 1,10E+06 | 4,10E+06 | 4  | 4  | 15 | 13 | 16 | 4  | 8  | 13 | 14 | 9  | 8  | 7          | 12           | Deamidate  | 27907      |            |       |
| NDU12     | NADH deH P15040 NDU12_HUMAN         | 108,59 | 21 | 21 | 21 | 14 | 14 | 21 | 21 | 21 | 8  | 14 | 21 | 7,01E+06  | 7,19E+06 | 5,59E+06 | 5,01E+05 | 2,48E+06 | 9,36E+06 | 7,51E+06 | 1,98E+06 | 2,50E+06 | 1,10E+06 | 4,10E+06 | 4  | 4  | 15 | 13 | 16 | 4  | 8  | 13 | 14 | 9  | 8  | 7          | 12           | Deamidate  | 27932      |            |       |
| PSA2      | Proteasom P25787 PSA2_HUMAN         | 108,54 | 12 | 17 | 11 | 6  | 17 | 17 | 17 | 17 | 17 | 17 | 17 | 1,44E+06  | 3,58E+06 | 2,54E+06 | 1,70E+05 | 1,34E+06 | 4,73E+06 | 1,19E+07 | 2,43E+06 | 3,40E+05 | 2,85E+05 | 2,12E+06 | 4  | 4  | 3  | 4  | 6  | 1  | 4  | 6  | 9  | 4  | 2  | 2          | 5            | Deamidate  | 25899      |            |       |
| ADA024R52 | Proteasom T1ADA024R52 ADA024_HUMAN  | 108,54 | 12 | 17 | 11 | 6  | 17 | 17 | 17 | 17 | 17 | 17 | 17 | 1,44E+06  | 3,58E+06 | 2,54E+06 | 1,70E+05 | 1,34E+06 | 4,73E+06 | 1,19E+07 | 2,43E+06 | 3,40E+05 | 2,85E+05 | 2,12E+06 | 4  | 4  | 3  | 4  | 6  | 1  | 4  | 6  | 9  | 4  | 2  | 2          | 5            | Deamidate  | 25899      |            |       |
| ADA72V2H3 | Proteasom T1ADA72V2H3 ADA72_HUMAN   | 108,54 | 12 | 17 | 11 | 6  | 17 | 17 | 17 | 17 | 17 | 17 | 17 | 1,44E+06  | 3,58E+06 | 2,54E+06 | 1,70E+05 | 1,34E+06 | 4,73E+06 | 1,19E+07 | 2,43E+06 | 3,40E+05 | 2,85E+05 | 2,12E+06 | 4  | 4  | 3  | 4  | 6  | 1  | 4  | 6  | 9  | 4  | 2  | 2          | 5            | Deamidate  | 19914      |            |       |
| RLD15     | Ribosomal T07021 RLD15_HUMAN        | 108,38 | 14 | 13 | 10 | 0  | 3  | 19 | 13 | 13 | 0  | 0  | 0  | 3,13E+07  | 9,88E+06 | 8,53E+06 | 5,98E+05 | 1,49E+07 | 1,85E+07 | 6,72E+06 | 3,32E+05 | 0        | 6        | 6        | 12 | 10 | 8  | 0  | 2  | 13 | 11 | 10 | 0  | 1  | 1  | Phosphoryl | 54973        |            |            |            |       |
| IRS26     | Ribosomal T1IRS26 IRS26_HUMAN       | 108,38 | 17 | 15 | 12 | 0  | 3  | 21 | 15 | 15 | 0  | 3  | 3  | 3,13E+07  | 9,88E+06 | 8,53E+06 | 5,98E+05 | 1,49E+07 | 1,85E+07 | 6,72E+06 | 3,32E+05 | 0        | 6        | 6        | 12 | 10 | 8  | 0  | 2  | 13 | 11 | 10 | 0  | 1  | 1  | Phosphoryl | 49209        |            |            |            |       |
| GRPR      | Glycoprote G19U807 GRPR_HUMAN       | 108,33 | 23 | 19 | 16 | 0  | 15 | 17 | 12 | 12 | 12 | 12 | 12 | 8,21E+07  | 2,58E+06 | 1,94E+06 | 0        | 1,01E+06 | 3,01E+06 | 7,47E+05 | 0        | 0        | 0        | 2,64E+05 | 8  | 8  | 8  | 9  | 8  | 4  | 0  | 4  | 4  | 4  | 4  | 1          | 3            | Beta-meth  | 35668      |            |       |
| GV325     | ATPSM-F T1GV325 GV325_HUMAN         | 108,23 | 2  | 2  | 3  | 2  | 2  | 2  | 2  | 2  | 2  | 2  | 2  | 3,64E+06  | 6,73E+06 | 5,77E+06 | 6,31E+05 | 1,03E+06 | 7,40E+06 | 9,64E+06 | 1,35E+06 | 1,75E+05 | 6,73E+05 | 1,05E+06 | 6  | 6  | 12 | 13 | 12 | 3  | 5  | 12 | 17 | 7  | 5  | 5          | 5            | Deamidate  | 84110      |            |       |
| E7EWH7    | Kinesin light T1E7EWH7 E7EWH7_HUMAN | 108,19 | 8  | 12 | 11 | 0  | 2  | 9  | 12 | 11 | 0  | 0  | 0  | 0         | 1,97E+06 | 4,18E+06 | 3,75E+06 | 0        | 3,26E+06 | 8,11E+06 | 2,04E+06 | 0        | 0        | 0        | 9  | 9  | 7  | 12 | 13 | 0  | 1  | 22 | 14 | 0  | 0  | 0          | 0            | Phosphoryl | 82482      |            |       |
| FRNKL3    | Kinesin light T1FRNKL3 FRNKL3_HUMAN | 108,19 | 9  | 12 | 11 | 0  | 2  | 9  | 12 | 11 | 0  | 0  | 0  | 0         | 1,97E+06 | 4,18E+06 | 3,75E+06 | 0        | 3,26E+06 | 8,11E+06 | 2,04E+06 | 0        | 0        | 0        | 9  | 9  | 7  | 12 | 13 | 0  | 1  | 22 | 14 | 0  | 0  | 0          | 0            | Phosphoryl | 65468      |            |       |
| GV3H3     | Kinesin light T1GV3H3 GV3H3_HUMAN   | 108,19 | 9  | 14 | 13 | 0  | 2  | 14 | 12 | 0  | 0  | 0  | 0  | 0         | 1,97E+06 | 4,18E+06 | 3,75E+06 | 0        | 3,26E+06 | 8,11E+06 | 2,04E+06 | 0        | 0        | 0        | 9  | 9  | 7  | 12 | 13 | 0  | 1  | 22 | 14 | 0  | 0  | 0          | 0            | Phosphoryl | 68775      |            |       |
| GV2E7     | Kinesin light T1GV2E7 GV2E7_HUMAN   | 108,19 | 9  | 14 | 13 | 0  | 2  | 14 | 12 | 0  | 0  | 0  | 0  | 0         | 1,97E+06 | 4,18E+06 | 3,75E+06 | 0        | 3,26E+06 | 8,11E+06 | 2,04E+06 | 0        | 0        | 0        | 9  | 9  | 7  | 12 | 13 | 0  | 1  | 22 | 14 | 0  | 0  | 0          | 0            | Phosphoryl | 62716      |            |       |
| GV3S9     | Kinesin light T1GV3S9 GV3S9_HUMAN   | 108,19 | 9  | 14 | 12 | 0  | 2  | 11 | 14 | 12 | 0  | 0  | 0  | 0         | 1,97E+06 | 4,18E+06 | 3,75E+06 | 0        | 3,26E+06 | 8,11E+06 | 2,04E+06 | 0        | 0        | 0        | 9  | 9  | 7  | 12 | 13 | 0  | 1  | 22 | 14 | 0  | 0  | 0          | 0            | Phosphoryl | 71408      |            |       |
| KLC1      | Kinesin light T07866 KLC1_HUMAN     | 108,19 | 10 | 15 | 14 | 0  | 2  | 12 | 15 | 13 | 0  | 0  | 0  | 0         | 1,97E+06 | 4,18E+06 | 3,75E+06 | 0        | 3,26E+06 | 8,11E+06 | 2,04E+06 | 0        | 0        | 0        | 9  | 9  | 7  | 12 | 13 | 0  | 1  | 22 | 14 | 0  | 0  | 0          | 0            | Phosphoryl | 65310      |            |       |
| GNAG      | GNAG P55148 GNAG_HUMAN              | 108,07 | 18 | 9  | 12 | 3  | 13 | 18 | 11 | 11 | 11 | 11 | 11 | 15,12E+05 | 4,64E+06 | 5,59E+06 | 2,42E+06 | 0        | 1,21E+06 | 3,49E+05 | 9,30E+04 | 1,27E+06 | 4,55E+05 | 12       | 12 | 5  | 13 |    |    |    |    |    |    |    |    |            |              |            |            |            |       |



|            |                                                         |       |    |    |    |    |    |    |    |    |    |    |    |          |          |          |          |          |          |          |          |          |          |          |    |    |    |    |    |    |    |    |    |    |   |           |           |           |          |       |
|------------|---------------------------------------------------------|-------|----|----|----|----|----|----|----|----|----|----|----|----------|----------|----------|----------|----------|----------|----------|----------|----------|----------|----------|----|----|----|----|----|----|----|----|----|----|---|-----------|-----------|-----------|----------|-------|
| CNN2       | Calonin-2 Q99439 CNN2_HUMAN                             | 98,52 | 7  | 9  | 13 | 4  | 4  | 13 | 19 | 13 | 7  | 7  | 4  | 3,48E+06 | 2,94E+05 | 2,30E+06 | 4,64E+06 | 4,19E+06 | 1,23E+06 | 7,51E+04 | 0        | 0        | 6        | 2        | 11 | 8  | 13 | 2  | 3  | 13 | 18 | 8  | 5  | 3  | 6 | Deamidat  | 33697     |           |          |       |
| BD48       | Calonin O tr BD48 UBI8 BD48UTL_HL                       | 98,52 | 7  | 8  | 12 | 3  | 3  | 12 | 18 | 12 | 7  | 7  | 3  | 3,48E+06 | 2,94E+05 | 2,30E+06 | 4,64E+06 | 4,19E+06 | 1,23E+06 | 7,51E+04 | 0        | 0        | 6        | 2        | 11 | 8  | 13 | 2  | 3  | 13 | 18 | 8  | 5  | 3  | 6 | Deamidat  | 28665     |           |          |       |
| H3RVE      | Calonin O tr H3RVE H3RVE_HUM                            | 98,52 | 8  | 11 | 15 | 4  | 4  | 15 | 23 | 16 | 8  | 8  | 4  | 3,48E+06 | 2,94E+05 | 2,30E+06 | 4,64E+06 | 4,19E+06 | 1,23E+06 | 7,51E+04 | 0        | 0        | 6        | 2        | 11 | 8  | 13 | 2  | 3  | 13 | 18 | 8  | 5  | 3  | 6 | Deamidat  | 35944     |           |          |       |
| AD0407X271 | Calonin O tr AD0407X271 HUMAN                           | 98,52 | 16 | 22 | 6  | 22 | 6  | 22 | 12 | 12 | 6  | 6  | 3  | 3,48E+06 | 2,94E+05 | 2,30E+06 | 4,64E+06 | 4,19E+06 | 1,23E+06 | 7,51E+04 | 0        | 0        | 5        | 2        | 11 | 5  | 13 | 2  | 3  | 13 | 18 | 8  | 5  | 3  | 9 | Deamidat  | 31975     |           |          |       |
| AD07POT69  | Cathepsin L tr AD07POT69 AD07P_98,48                    | 98,48 | 7  | 7  | 7  | 7  | 7  | 7  | 7  | 7  | 7  | 7  | 7  | 7,69E+06 | 1,11E+07 | 9,79E+06 | 2,28E+06 | 5,24E+06 | 9,93E+06 | 1,13E+07 | 6,18E+06 | 2,29E+06 | 5,69E+06 | 1,15E+07 | 7  | 7  | 10 | 12 | 7  | 5  | 8  | 8  | 7  | 13 | 5 | 9         | Deamidat  | 35314     |          |       |
| AD07POT86  | Cathepsin L tr AD07POT86 AD07P_98,48                    | 98,48 | 7  | 7  | 7  | 7  | 7  | 7  | 7  | 7  | 7  | 7  | 7  | 7,69E+06 | 1,11E+07 | 9,79E+06 | 2,28E+06 | 5,24E+06 | 9,93E+06 | 1,13E+07 | 6,18E+06 | 2,29E+06 | 5,69E+06 | 1,15E+07 | 7  | 7  | 10 | 12 | 7  | 5  | 8  | 8  | 7  | 13 | 5 | 9         | Deamidat  | 37088     |          |       |
| AD07POT49  | Cathepsin L tr AD07POT49 AD07P_98,48                    | 98,48 | 9  | 9  | 9  | 9  | 9  | 9  | 9  | 9  | 9  | 9  | 9  | 7,69E+06 | 1,11E+07 | 9,79E+06 | 2,28E+06 | 5,24E+06 | 9,93E+06 | 1,13E+07 | 6,18E+06 | 2,29E+06 | 5,69E+06 | 1,15E+07 | 6  | 6  | 10 | 12 | 7  | 5  | 7  | 8  | 7  | 13 | 5 | 9         | Deamidat  | 27409     |          |       |
| AD07POT49  | Cathepsin L tr AD07POT49 AD07P_98,48                    | 98,48 | 9  | 9  | 9  | 9  | 9  | 9  | 9  | 9  | 9  | 9  | 9  | 7,69E+06 | 1,11E+07 | 9,79E+06 | 2,28E+06 | 5,24E+06 | 9,93E+06 | 1,13E+07 | 6,18E+06 | 2,29E+06 | 5,69E+06 | 1,15E+07 | 6  | 6  | 10 | 12 | 7  | 5  | 7  | 8  | 7  | 13 | 5 | 9         | Deamidat  | 35799     |          |       |
| AD07POT161 | Cathepsin L tr AD07POT161 AD07P_98,48                   | 98,48 | 10 | 10 | 10 | 10 | 10 | 10 | 10 | 10 | 10 | 10 | 10 | 7,69E+06 | 1,11E+07 | 9,79E+06 | 2,28E+06 | 5,24E+06 | 9,93E+06 | 1,13E+07 | 6,18E+06 | 2,29E+06 | 5,69E+06 | 1,15E+07 | 7  | 7  | 10 | 12 | 7  | 5  | 7  | 8  | 7  | 13 | 5 | 9         | Deamidat  | 43301     |          |       |
| AD07POT26  | Cathepsin L tr AD07POT26 AD07P_98,48                    | 98,48 | 10 | 10 | 10 | 10 | 10 | 10 | 10 | 10 | 10 | 10 | 10 | 7,69E+06 | 1,11E+07 | 9,79E+06 | 2,28E+06 | 5,24E+06 | 9,93E+06 | 1,13E+07 | 6,18E+06 | 2,29E+06 | 5,69E+06 | 1,15E+07 | 7  | 7  | 10 | 12 | 7  | 5  | 8  | 8  | 7  | 13 | 5 | 9         | Deamidat  | 24832     |          |       |
| AD07POTAT6 | Cathepsin L tr AD07POTAT6 AD07P_98,48                   | 98,48 | 9  | 9  | 9  | 9  | 9  | 9  | 9  | 9  | 9  | 9  | 9  | 7,69E+06 | 1,11E+07 | 9,79E+06 | 2,28E+06 | 5,24E+06 | 9,93E+06 | 1,13E+07 | 6,18E+06 | 2,29E+06 | 5,69E+06 | 1,15E+07 | 7  | 7  | 10 | 12 | 7  | 5  | 8  | 8  | 7  | 13 | 5 | 9         | Deamidat  | 26810     |          |       |
| AD07POTB85 | Cathepsin L tr AD07POTB85 AD07P_98,48                   | 98,48 | 8  | 8  | 8  | 8  | 8  | 8  | 8  | 8  | 8  | 8  | 8  | 7,69E+06 | 1,11E+07 | 9,79E+06 | 2,28E+06 | 5,24E+06 | 9,93E+06 | 1,13E+07 | 6,18E+06 | 2,29E+06 | 5,69E+06 | 1,15E+07 | 6  | 6  | 10 | 12 | 7  | 5  | 7  | 8  | 7  | 13 | 5 | 9         | Deamidat  | 30611     |          |       |
| AD07POT841 | Cathepsin L tr AD07POT841 AD07P_98,48                   | 98,48 | 8  | 8  | 8  | 8  | 8  | 8  | 8  | 8  | 8  | 8  | 8  | 7,69E+06 | 1,11E+07 | 9,79E+06 | 2,28E+06 | 5,24E+06 | 9,93E+06 | 1,13E+07 | 6,18E+06 | 2,29E+06 | 5,69E+06 | 1,15E+07 | 6  | 6  | 10 | 12 | 7  | 5  | 7  | 8  | 7  | 13 | 5 | 9         | Deamidat  | 32007     |          |       |
| AD07POT245 | Cathepsin L tr AD07POT245 AD07P_98,48                   | 98,48 | 8  | 8  | 8  | 8  | 8  | 8  | 8  | 8  | 8  | 8  | 8  | 7,69E+06 | 1,11E+07 | 9,79E+06 | 2,28E+06 | 5,24E+06 | 9,93E+06 | 1,13E+07 | 6,18E+06 | 2,29E+06 | 5,69E+06 | 1,15E+07 | 6  | 6  | 10 | 12 | 7  | 5  | 7  | 8  | 7  | 13 | 5 | 9         | Deamidat  | 32278     |          |       |
| AD07POTB7  | Cathepsin L tr AD07POTB7 AD07P_98,48                    | 98,48 | 7  | 7  | 7  | 7  | 7  | 7  | 7  | 7  | 7  | 7  | 7  | 7,69E+06 | 1,11E+07 | 9,79E+06 | 2,28E+06 | 5,24E+06 | 9,93E+06 | 1,13E+07 | 6,18E+06 | 2,29E+06 | 5,69E+06 | 1,15E+07 | 6  | 6  | 10 | 12 | 7  | 5  | 7  | 8  | 7  | 13 | 5 | 9         | Deamidat  | 32883     |          |       |
| CATZ       | Cathepsin L Q9UBK2 CATZ_HUMAN                           | 98,48 | 7  | 7  | 7  | 7  | 7  | 7  | 7  | 7  | 7  | 7  | 7  | 7,69E+06 | 1,11E+07 | 9,79E+06 | 2,28E+06 | 5,24E+06 | 9,93E+06 | 1,13E+07 | 6,18E+06 | 2,29E+06 | 5,69E+06 | 1,15E+07 | 7  | 7  | 10 | 12 | 7  | 5  | 8  | 8  | 7  | 13 | 5 | 9         | Deamidat  | 33868     |          |       |
| AD07POTB2X | Cathepsin L tr AD07POTB2X AD07P_98,48                   | 98,48 | 7  | 7  | 7  | 7  | 7  | 7  | 7  | 7  | 7  | 7  | 7  | 7,69E+06 | 1,11E+07 | 9,79E+06 | 2,28E+06 | 5,24E+06 | 9,93E+06 | 1,13E+07 | 6,18E+06 | 2,29E+06 | 5,69E+06 | 1,15E+07 | 6  | 6  | 10 | 12 | 7  | 5  | 7  | 8  | 7  | 13 | 5 | 9         | Deamidat  | 35015     |          |       |
| SHL3       | SH3 domain Q9U299 SHL3_HUMAN                            | 98,42 | 20 | 31 | 45 | 0  | 20 | 31 | 31 | 31 | 11 | 11 | 16 | 1,15E+06 | 1,65E+07 | 1,54E+07 | 3,79E+05 | 5,33E+06 | 9,79E+06 | 2,68E+06 | 5,84E+05 | 0        | 0        | 6        | 6  | 7  | 19 | 21 | 0  | 1  | 11 | 13 | 1  | 1  | 1 | 1         | Deamidat  | 10438     |          |       |
| Q5T123     | SH3 domain tr Q5T123 Q5T123_HUM                         | 98,42 | 22 | 33 | 48 | 0  | 22 | 33 | 33 | 33 | 11 | 11 | 17 | 1,15E+06 | 1,65E+07 | 1,54E+07 | 3,79E+05 | 5,33E+06 | 9,79E+06 | 2,68E+06 | 5,84E+05 | 0        | 0        | 6        | 6  | 7  | 19 | 21 | 0  | 1  | 11 | 13 | 1  | 1  | 1 | 1         | Deamidat  | 9381      |          |       |
| RHOQ       | Rho-related P84095 RHOQ_HUMAN                           | 98,42 | 20 | 14 | 20 | 0  | 4  | 19 | 14 | 14 | 10 | 10 | 20 | 2,78E+05 | 9,68E+05 | 9,61E+05 | 6,73E+04 | 2,07E+06 | 1,40E+06 | 0        | 0        | 0        | 0        | 8,02E+04 | 4  | 4  | 8  | 6  | 8  | 0  | 1  | 8  | 10 | 3  | 1 | 0         | 5         | beta-meth | 21308    |       |
| IPR2       | Inorganic pyrophosphatase Q9H2U2 IPR2_HUMAN             | 98,32 | 13 | 10 | 15 | 7  | 10 | 18 | 15 | 7  | 10 | 7  | 15 | 1,94E+06 | 8,81E+06 | 4,68E+06 | 8,20E+05 | 4,55E+06 | 7,12E+06 | 5,02E+06 | 5,83E+06 | 3,16E+06 | 3,44E+05 | 4,60E+06 | 7  | 6  | 5  | 6  | 9  | 8  | 5  | 8  | 5  | 8  | 4 | 7         | beta-meth | 37920     |          |       |
| ERLN1      | Erlin-1 Q57477 ERLN1_HUMAN                              | 98,14 | 13 | 13 | 7  | 7  | 17 | 11 | 11 | 11 | 11 | 11 | 11 | 1,74E+06 | 2,11E+06 | 1,85E+06 | 0        | 8,53E+05 | 3,21E+06 | 2,50E+06 | 9,42E+05 | 3,95E+05 | 2,29E+05 | 8,15E+05 | 4  | 4  | 11 | 10 | 9  | 9  | 13 | 5  | 7  | 5  | 8 | Phosphory | 39171     |           |          |       |
| ILF        | Integrin-like Q31481 ILF_HUMAN                          | 98,05 | 3  | 10 | 6  | 0  | 6  | 13 | 3  | 0  | 0  | 0  | 0  | 4,38E+06 | 1,47E+07 | 2,87E+07 | 4,82E+06 | 4,25E+07 | 9,45E+06 | 0        | 0        | 0        | 0        | 0        | 6  | 6  | 5  | 15 | 10 | 0  | 3  | 12 | 3  | 0  | 0 | 0         | 0         | Deamidat  | 51419    |       |
| AD040MTH3  | 59 kDa seric tr AD040MTH3 AD040_98,14                   | 98,14 | 3  | 9  | 5  | 0  | 0  | 0  | 0  | 0  | 0  | 0  | 0  | 4,38E+06 | 1,47E+07 | 2,87E+07 | 4,82E+06 | 4,25E+07 | 9,45E+06 | 0        | 0        | 0        | 0        | 0        | 6  | 6  | 5  | 15 | 10 | 0  | 3  | 12 | 3  | 0  | 0 | 0         | 0         | Deamidat  | 54612    |       |
| PAG24      | Proteinase G9UQ80 PAG24_HUM                             | 98,02 | 9  | 14 | 21 | 3  | 3  | 13 | 21 | 8  | 6  | 0  | 0  | 3,47E+05 | 9,40E+06 | 2,52E+07 | 6,91E+06 | 8,49E+05 | 0        | 0        | 0        | 0        | 0        | 3,50E+05 | 9  | 9  | 9  | 5  | 10 | 13 | 1  | 12 | 20 | 8  | 3 | 0         | 2         | Deamidat  | 43787    |       |
| RL38       | 60S ribosomal P61 P71 RL38_HUMAN                        | 97,96 | 33 | 33 | 19 | 19 | 19 | 33 | 33 | 33 | 0  | 19 | 19 | 5,00E+06 | 7,04E+06 | 4,98E+06 | 0        | 0        | 6,33E+06 | 7,61E+06 | 2,89E+06 | 0        | 0        | 0        | 0  | 5  | 5  | 4  | 5  | 7  | 1  | 1  | 6  | 6  | 4 | 0         | 1         | 1         | Mutation | 43842 |
| J3526      | 60S ribosomal P0 P1 J3526_HUMAN                         | 97,96 | 34 | 34 | 19 | 19 | 34 | 34 | 34 | 0  | 19 | 19 | 19 | 5,00E+06 | 7,04E+06 | 4,98E+06 | 0        | 0        | 6,33E+06 | 7,61E+06 | 2,89E+06 | 0        | 0        | 0        | 0  | 5  | 5  | 4  | 5  | 7  | 1  | 1  | 6  | 6  | 4 | 0         | 1         | 1         | Mutation | 3977  |
| J3K773     | 60S ribosomal P1 J3K773 J3K773_HUM                      | 97,96 | 36 | 36 | 36 | 20 | 20 | 36 | 36 | 36 | 0  | 20 | 20 | 5,00E+06 | 7,04E+06 | 4,98E+06 | 0        | 0        | 6,33E+06 | 7,61E+06 | 2,89E+06 | 0        | 0        | 0        | 0  | 5  | 5  | 4  | 5  | 7  | 1  | 1  | 6  | 6  | 4 | 0         | 1         | 1         | Mutation | 7565  |
| CAVNA6     | Caveolin-6 Q58K8X CAVNA6_HUMA                           | 97,92 | 6  | 15 | 7  | 0  | 7  | 9  | 9  | 7  | 3  | 13 | 13 | 1,12E+06 | 8,89E+05 | 4,82E+05 | 2,08E+05 | 2,84E+06 | 2,28E+06 | 3,89E+05 | 1,62E+05 | 0        | 0        | 6,66E+05 | 6  | 6  | 6  | 7  | 4  | 0  | 3  | 8  | 7  | 4  | 3 | 1         | 8         | Phosphory | 41889    |       |
| CD52       | Phosphatidylinositol-5-OH-phosphatase Q95674 CD52_HUMAN | 97,86 | 9  | 9  | 9  | 9  | 9  | 9  | 9  | 9  | 9  | 9  | 9  | 3,67E+06 | 5,35E+06 | 3,85E+06 | 2,37E+05 | 5,84E+06 | 6,63E+06 | 5,32E+05 | 8,51E+05 | 7,52E+05 | 4,28E+06 | 3        | 3  | 10 | 7  | 3  | 4  | 4  | 8  | 9  | 5  | 4  | 4 | 10        | Deamidat  | 51418     |          |       |
| HIBCH1     | Hydroxy-methylglutaryl-CoA lyase Q6YV11 HIBCH1_HUMAN    | 97,84 | 10 | 10 | 13 | 0  | 12 | 16 | 13 | 12 | 10 | 7  | 17 | 2,75E+06 | 8,89E+06 | 4,00E+06 | 2,16E+06 | 1,27E+07 | 4,37E+06 | 3,02E+06 | 1,59E+06 | 1,59E+06 | 3,20E+06 | 9        | 9  | 9  | 8  | 7  | 0  | 9  | 12 | 6  | 5  | 5  | 4 | 3         | 10        | beta-meth | 43482    |       |
| CD32L      | Myeloid-as tr CD32L CD32L_HUM                           | 97,65 | 18 | 18 | 18 | 18 | 18 | 18 | 18 | 12 | 12 | 12 | 5  | 3,19E+06 | 6,43E+06 | 6,78E+06 | 1,34E+06 | 9,84E+06 | 1,11E+07 | 1,20E+06 | 9,50E+05 | 1,21E+06 | 5,25E+05 | 6        | 6  | 6  | 4  | 2  | 3  | 0  | 4  | 3  | 3  | 2  | 2 | 2         | 2         | 2         | Mutation | 20379 |





|            |                                              |       |    |    |    |    |    |    |    |    |    |    |          |          |          |          |          |          |          |          |          |          |          |          |    |    |    |    |    |    |    |    |    |    |            |          |          |          |       |
|------------|----------------------------------------------|-------|----|----|----|----|----|----|----|----|----|----|----------|----------|----------|----------|----------|----------|----------|----------|----------|----------|----------|----------|----|----|----|----|----|----|----|----|----|----|------------|----------|----------|----------|-------|
| ANM1       | Protein arg Q99873 ANM1_HUMAN                | 81.25 | 10 | 12 | 10 | 0  | 3  | 10 | 10 | 10 | 0  | 7  | 3        | 1.98E+06 | 3.80E+06 | 3.78E+06 | 7.06E+05 | 9.14E+06 | 8.55E+06 | 3.33E+06 | 1.18E+05 | 0        | 7        | 7        | 7  | 6  | 6  | 0  | 1  | 12 | 11 | 8  | 0  | 2  | 2          | 42462    |          |          |       |
| EPHX6      | Protein arg tr EPHX6 EPHX6_HUMAN             | 81.25 | 18 | 18 | 18 | 0  | 6  | 18 | 18 | 18 | 0  | 13 | 5        | 1.98E+06 | 3.61E+06 | 3.78E+06 | 7.06E+05 | 9.14E+06 | 8.55E+06 | 3.33E+06 | 1.18E+05 | 0        | 6        | 6        | 7  | 5  | 6  | 0  | 1  | 12 | 11 | 8  | 0  | 2  | 2          | 23897    |          |          |       |
| EPXQ8      | Protein arg tr EPXQ8 EPXQ8_HUMAN             | 81.25 | 19 | 19 | 19 | 0  | 6  | 19 | 19 | 19 | 0  | 13 | 5        | 1.98E+06 | 3.61E+06 | 3.78E+06 | 7.06E+05 | 9.14E+06 | 8.55E+06 | 3.33E+06 | 1.18E+05 | 0        | 6        | 6        | 7  | 5  | 6  | 0  | 1  | 12 | 11 | 8  | 0  | 2  | 2          | 23897    |          |          |       |
| LSM8       | LSM8 OS P51293 LSM8_HUMAN                    | 81.25 | 17 | 17 | 17 | 0  | 3  | 17 | 17 | 17 | 0  | 0  | 4.02E+05 | 1.21E+06 | 1.21E+06 | 0        | 0        | 0        | 0        | 0        | 0        | 0        | 4        | 4        | 1  | 4  | 1  | 4  | 1  | 4  | 1  | 4  | 1  | 4  | 1          | 10403    |          |          |       |
| CUZD2      | US hSRNA- tr CUZD2 CUZD2_HUMAN               | 81.21 | 21 | 21 | 21 | 0  | 0  | 21 | 21 | 21 | 0  | 0  | 0        | 4.02E+05 | 1.20E+06 | 9.36E+05 | 2.08E+06 | 3.01E+06 | 5.74E+05 | 0        | 0        | 0        | 4        | 4        | 1  | 3  | 3  | 0  | 0  | 4  | 7  | 2  | 0  | 0  | 0          | 8109     |          |          |       |
| NA10       | N-alpha- ac P41227 NA10_HUMAN                | 81.19 | 6  | 6  | 6  | 0  | 0  | 6  | 6  | 6  | 0  | 0  | 0        | 0        | 0        | 0        | 0        | 0        | 0        | 0        | 0        | 2        | 2        | 1        | 2  | 2  | 0  | 0  | 2  | 4  | 2  | 0  | 0  | 0  | 0          | 0        |          |          |       |
| KRT8A      | Keratin ty Q9NSB2 KRT8A_HUMAN                | 81.12 | 6  | 6  | 6  | 9  | 6  | 6  | 6  | 6  | 6  | 6  | 6        | 6        | 6        | 6        | 6        | 6        | 6        | 6        | 6        | 0        | 15       | 4        | 23 | 29 | 23 | 53 | 28 | 18 | 16 | 20 | 28 | 24 | Phosphoryl | 64842    |          |          |       |
| CU3D0      | Tubulin alp tr CU3D0 CU3D0_HUMAN             | 80.95 | 20 | 11 | 31 | 4  | 4  | 11 | 37 | 4  | 4  | 4  | 4        | 4        | 4        | 4        | 4        | 4        | 4        | 4        | 4        | 8        | 2        | 5        | 7  | 7  | 7  | 7  | 7  | 9  | 3  | 3  | 2  | 4  | Mutation   | 19808    |          |          |       |
| CU3E8      | Tubulin alp tr CU3E8 CU3E8_HUMAN             | 80.95 | 24 | 12 | 37 | 5  | 4  | 11 | 25 | 5  | 5  | 5  | 5        | 5        | 5        | 5        | 5        | 5        | 5        | 5        | 5        | 8        | 2        | 5        | 7  | 7  | 7  | 7  | 7  | 9  | 3  | 3  | 2  | 4  | Mutation   | 6876     |          |          |       |
| ADADU1RR22 | Protein kin tr ADADU1RR22 ADADU1RR22_HUMAN   | 80.92 | 2  | 7  | 6  | 0  | 2  | 2  | 2  | 2  | 2  | 2  | 2        | 2        | 2        | 2        | 2        | 2        | 2        | 2        | 2        | 0        | 0        | 0        | 0  | 0  | 0  | 0  | 1  | 2  | 7  | 2  | 2  | 1  | 1          | Mutation | 51828    |          |       |
| PACN2      | Protein kin QUNF01 PACN2_HUMAN               | 80.92 | 2  | 6  | 5  | 0  | 2  | 7  | 2  | 2  | 2  | 2  | 2        | 2        | 2        | 2        | 2        | 2        | 2        | 2        | 2        | 0        | 0        | 0        | 0  | 0  | 0  | 0  | 1  | 2  | 7  | 2  | 2  | 1  | 1          | Mutation | 55739    |          |       |
| MTRX       | Exosome R P42285 MTRX_HUMAN                  | 80.92 | 1  | 1  | 2  | 2  | 4  | 2  | 2  | 1  | 0  | 2  | 1        | 0        | 2        | 1        | 0        | 2        | 1        | 0        | 0        | 0        | 0        | 0        | 0  | 0  | 0  | 0  | 5  | 5  | 4  | 0  | 1  | 2  | Deamidat   | 117805   |          |          |       |
| ARSA       | Arylsulfa P15299 ARSA_HUMAN                  | 80.92 | 3  | 3  | 3  | 0  | 3  | 3  | 3  | 3  | 0  | 3  | 2.76E+05 | 7.62E+05 | 6.35E+05 | 0        | 6.03E+05 | 2.20E+05 | 5.83E+05 | 8.52E+04 | 2.53E+05 | 4.90E+06 | 6.47E+05 | 7        | 7  | 2  | 2  | 5  | 1  | 3  | 3  | 3  | 3  | 3  | 4          | Deamidat | 53588    |          |       |
| ADAD4CD2F2 | Arylsulfa P15299 ADAD4CD2F2 ADAD4CD2F2_HUMAN | 80.92 | 3  | 3  | 3  | 3  | 3  | 3  | 3  | 3  | 3  | 3  | 3        | 3        | 3        | 3        | 3        | 3        | 3        | 3        | 3        | 0        | 0        | 0        | 0  | 0  | 0  | 0  | 1  | 3  | 3  | 3  | 1  | 1  | 0          | 0        | 0        |          |       |
| AFN2Q9     | Septin OS- tr AFN2Q9 AFN2Q9_HUMAN            | 80.86 | 6  | 15 | 13 | 2  | 4  | 12 | 8  | 7  | 4  | 2  | 7        | 1.50E+05 | 9.55E+05 | 1.16E+06 | 9.33E+05 | 2.35E+06 | 2.04E+06 | 9.78E+05 | 3.05E+05 | 0        | 6        | 10       | 17 | 11 | 4  | 2  | 12 | 13 | 8  | 2  | 3  | 4  | Deamidat   | 50928    |          |          |       |
| AFN6M6     | Septin OS- tr AFN6M6 AFN6M6_HUMAN            | 80.86 | 7  | 15 | 13 | 2  | 4  | 11 | 8  | 6  | 4  | 2  | 7        | 1.50E+05 | 9.55E+05 | 1.16E+06 | 9.33E+05 | 2.35E+06 | 2.04E+06 | 9.78E+05 | 3.05E+05 | 0        | 6        | 10       | 17 | 11 | 4  | 2  | 12 | 13 | 8  | 2  | 3  | 4  | Deamidat   | 49916    |          |          |       |
| ADAD87X142 | Septin OS- tr ADAD87X142 ADAD87X142_HUMAN    | 80.86 | 7  | 15 | 13 | 2  | 4  | 12 | 9  | 7  | 4  | 2  | 7        | 1.50E+05 | 9.55E+05 | 1.16E+06 | 9.33E+05 | 2.35E+06 | 2.04E+06 | 9.78E+05 | 3.05E+05 | 0        | 6        | 10       | 17 | 11 | 4  | 2  | 12 | 13 | 8  | 2  | 3  | 4  | Deamidat   | 49356    |          |          |       |
| FBWB8      | Septin OS- tr FBWB8 FBWB8_HUMAN              | 80.86 | 6  | 14 | 12 | 2  | 4  | 11 | 8  | 6  | 4  | 2  | 7        | 1.50E+05 | 9.55E+05 | 1.16E+06 | 9.33E+05 | 2.35E+06 | 2.04E+06 | 9.78E+05 | 3.05E+05 | 0        | 6        | 10       | 17 | 11 | 4  | 2  | 12 | 13 | 8  | 2  | 3  | 4  | Deamidat   | 53163    |          |          |       |
| SEPT8      | Septin OS- Q92599 SEPT8_HUMAN                | 80.86 | 6  | 14 | 12 | 2  | 4  | 11 | 8  | 6  | 4  | 2  | 7        | 1.50E+05 | 9.55E+05 | 1.16E+06 | 9.33E+05 | 2.35E+06 | 2.04E+06 | 9.78E+05 | 3.05E+05 | 0        | 6        | 10       | 17 | 11 | 4  | 2  | 12 | 13 | 8  | 2  | 3  | 4  | Deamidat   | 55756    |          |          |       |
| G3V4P8     | Glia matur tr G3V4P8 G3V4P8_HUMAN            | 80.81 | 23 | 15 | 15 | 0  | 15 | 15 | 15 | 15 | 15 | 15 | 15       | 15       | 4.99E+06 | 1.01E+06 | 1.09E+06 | 2.96E+05 | 5.05E+06 | 4.60E+04 | 0        | 5.82E+04 | 2        | 2        | 2  | 2  | 3  | 2  | 0  | 1  | 6  | 1  | 0  | 1  | 2          | Mutation | 17512    |          |       |
| GMBF       | Glia matur P60983 GMBF_HUMAN                 | 80.81 | 24 | 16 | 16 | 0  | 16 | 16 | 16 | 16 | 16 | 16 | 16       | 16       | 4.99E+06 | 1.01E+06 | 1.09E+06 | 2.96E+05 | 5.05E+06 | 4.60E+04 | 0        | 5.82E+04 | 2        | 2        | 2  | 2  | 3  | 2  | 0  | 1  | 6  | 1  | 0  | 1  | 2          | Deamidat | 16713    |          |       |
| EHH        | Enhancer P84900 EHH_HUMAN                    | 80.75 | 38 | 27 | 38 | 27 | 27 | 38 | 27 | 38 | 16 | 11 | 27       | 1.45E+07 | 1.44E+07 | 1.29E+07 | 9.49E+05 | 9.73E+06 | 5.26E+07 | 1.21E+07 | 6.93E+06 | 4.74E+05 | 0        | 2.79E+06 | 9  | 9  | 8  | 7  | 9  | 2  | 9  | 6  | 8  | 2  | 2          | 3        | Mutation | 12259    |       |
| DBLH       | Dblb hom Q99420 DBLH_HUMAN                   | 80.74 | 14 | 9  | 9  | 16 | 14 | 5  | 9  | 9  | 9  | 9  | 24       | 3.00E+06 | 4.67E+06 | 5.34E+06 | 3.04E+05 | 4.62E+06 | 4.73E+05 | 5.86E+05 | 1.73E+06 | 8.77E+05 | 7.34E+06 | 6        | 6  | 6  | 6  | 11 | 7  | 2  | 3  | 7  | 6  | 13 | Deamidat   | 27131    |          |          |       |
| PR40A      | Pre-mRNA P07540 PR40A_HUMAN                  | 80.64 | 3  | 4  | 3  | 0  | 1  | 3  | 2  | 1  | 0  | 0  | 4.12E+05 | 1.30E+06 | 3.34E+05 | 0        | 2.90E+06 | 1.96E+06 | 3.71E+05 | 0        | 0        | 0        | 7        | 7        | 3  | 6  | 4  | 0  | 1  | 5  | 3  | 2  | 1  | 0  | 0          | 0        |          |          |       |
| ADATN41394 | Pre-mRNA tr ADATN41394 ADATN41394_HUMAN      | 80.64 | 3  | 4  | 3  | 0  | 1  | 3  | 2  | 1  | 0  | 0  | 4.12E+05 | 1.30E+06 | 3.34E+05 | 0        | 2.90E+06 | 1.96E+06 | 3.71E+05 | 0        | 0        | 0        | 7        | 7        | 3  | 6  | 4  | 0  | 1  | 5  | 3  | 2  | 1  | 0  | 0          | 0        |          |          |       |
| STX5       | Syntaxin-5 Q11390 STX5_HUMAN                 | 80.56 | 11 | 11 | 8  | 0  | 8  | 8  | 11 | 11 | 0  | 8  | 8        | 1.91E+06 | 2.92E+06 | 2.20E+06 | 3.01E+05 | 3.17E+06 | 4.12E+06 | 1.65E+06 | 0        | 2.50E+05 | 2        | 2        | 3  | 3  | 2  | 0  | 1  | 3  | 3  | 4  | 0  | 1  | 1          | 3        | 36973    |          |       |
| HPCX5      | Syntaxin-5 tr HPCX5 HPCX5_HUMAN              | 80.56 | 18 | 12 | 0  | 0  | 8  | 8  | 18 | 12 | 0  | 12 | 12       | 1.91E+06 | 2.92E+06 | 2.20E+06 | 3.01E+05 | 3.17E+06 | 4.12E+06 | 1.65E+06 | 0        | 2.50E+05 | 2        | 2        | 3  | 3  | 2  | 0  | 1  | 3  | 3  | 4  | 0  | 1  | 1          | 3        | 2518     |          |       |
| SNPO       | Synaptotagmin Q8N3V9 SNPO_HUMAN              | 80.56 | 5  | 3  | 3  | 2  | 2  | 5  | 4  | 4  | 0  | 0  | 2.89E+06 | 0        | 0        | 1.58E+06 | 9.53E+05 | 3.34E+06 | 5.10E+05 | 2.76E+05 | 0        | 0        | 8        | 8        | 5  | 4  | 3  | 2  | 1  | 11 | 3  | 2  | 0  | 0  | 0          | 0        | 0        |          |       |
| ACADM      | Medium-ct P11310 ACADM_HUMAN                 | 80.44 | 14 | 9  | 6  | 4  | 6  | 12 | 9  | 9  | 9  | 4  | 9        | 3.73E+06 | 5.24E+06 | 5.56E+06 | 1.64E+05 | 1.81E+06 | 5.89E+06 | 6.03E+06 | 2.59E+06 | 1.99E+06 | 2.82E+05 | 3.29E+06 | 6  | 6  | 6  | 6  | 4  | 1  | 3  | 7  | 5  | 7  | 6          | 1        | 5        | Mutation | 46588 |
| QST4U5     | Medium-ct tr QST4U5 QST4U5_HUMAN             | 80.44 | 13 | 9  | 6  | 3  | 6  | 11 | 9  | 9  | 9  | 3  | 9        | 3.73E+06 | 5.24E+06 | 5.56E+06 | 1.64E+05 | 1.81E+06 | 5.89E+06 | 6.03E+06 | 2.59E+06 | 1.99E+06 | 2.82E+05 | 3.29E+06 | 6  | 6  | 6  | 6  | 4  | 1  | 3  | 7  | 5  | 7  | 6          | 1        | 5        | Mutation | 50778 |
| ADATP07B51 | Medium-ct tr ADATP07B51 ADATP07B51_HUMAN     | 80.44 | 17 | 11 | 8  | 4  | 8  | 11 | 11 | 11 | 11 | 4  | 11       | 3.73E+06 | 5.24E+06 | 5.56E+06 | 1.64E+05 | 1.81E+06 | 5.89E+06 | 6.03E+06 | 2.59E+06 | 1.99E+06 | 2.82E+05 | 3.29E+06 | 5  | 5  | 6  | 6  | 4  | 1  | 3  | 7  | 5  | 7  | 6          | 1        | 5        | Mutation | 32281 |
| R3Z8       | 45S ribosom P28257 R3Z8_HUMAN                | 80.39 | 30 | 30 | 17 | 17 | 30 | 30 | 30 | 30 | 17 | 2  | 11       | 1.24E+07 | 2.21E+07 | 1.48E+07 | 1.44E+07 | 1.60E+07 | 5.96E+07 | 1.68E+07 | 2.81E+05 | 4.76E+05 | 0        | 2        | 2  | 2  | 2  | 0  | 0  | 0  | 0  | 0  | 0  | 0  | 0          | 0        | 0        | 0        | 0     |
| ACPM       | Acy carrier O14561 ACPM_HUMAN                | 80.33 | 0  | 24 | 24 | 19 | 19 | 24 | 19 | 24 | 19 | 24 | 19       | 5.42E+07 | 4.97E+07 | 1.33E+07 | 3.19E+07 | 2.20E+06 | 7.09E+07 | 3.95E+07 | 3.34E+07 | 1.37E+07 | 2.58E+07 | 7        | 7  | 0  | 10 | 6  | 5  | 7  | 6  | 4  | 9  | 6  | 6          | 6        | Mutation | 17417    |       |
| NOP2       | Probable 2 P46087 NOP2_HUMAN                 | 80.33 | 4  | 8  | 5  | 0  | 11 | 5  | 5  | 0  | 0  | 0  | 4.46E+05 | 1.19E+06 | 1.39E+05 | 0        | 4.58E+06 | 2.03E+05 | 0        | 0        | 0        | 9        | 9        | 5        | 8  | 4  | 0  | 0  | 15 | 3  | 5  | 0  | 0  | 0  | 0          | 0        | 0        |          |       |
| YDPM1      | YDPM1 tr P49750 YDPM1_HUMAN                  | 80.24 | 3  | 2  | 2  | 0  | 0  | 2  | 2  | 2  | 0  | 0  | 2.80E+06 | 3.68E+06 | 5.24E+06 | 0        | 9.39E+06 | 8.96E+06 | 1.57E+06 | 0        | 0        | 0        | 7        | 7        | 7  | 7  | 11 | 11 | 6  | 11 | 4  | 0  | 0  | 0  | 0          | 0        |          |          |       |
| RH11       | YDPM1 tr Q8T1C2 RH11_HUMAN                   | 80.21 | 12 | 10 | 15 | 0  | 8  | 15 | 18 | 4  | 4  | 4  | 4        | 1.03E+06 | 1.32E+06 | 1.28E+06 | 2.61E+05 | 2.31E+06 | 3.74E+06 | 1.13E+05 | 1.93E+05 |          |          |          |    |    |    |    |    |    |    |    |    |    |            |          |          |          |       |





|            |                                     |       |    |    |    |    |    |    |    |    |    |    |          |          |          |          |          |          |          |          |          |          |          |          |   |    |    |    |    |   |    |    |    |       |          |          |          |          |
|------------|-------------------------------------|-------|----|----|----|----|----|----|----|----|----|----|----------|----------|----------|----------|----------|----------|----------|----------|----------|----------|----------|----------|---|----|----|----|----|---|----|----|----|-------|----------|----------|----------|----------|
| ADA7POT858 | Sorting nex tr ADA7POT858 ADA7P     | 74,23 | 0  | 5  | 9  | 0  | 1  | 3  | 3  | 3  | 0  | 0  | 1        | 0        | 1,68E+05 | 0        | 3,83E+05 | 5,54E+05 | 1,04E+05 | 1,31E+05 | 4        | 4        | 0        | 2        | 4 | 0  | 1  | 4  | 2  | 2 | 0  | 0  | 1  | 69648 |          |          |          |          |
| ADA7POT87  | Sorting nex tr ADA7POT87 ADA7P      | 74,23 | 0  | 5  | 9  | 0  | 1  | 3  | 3  | 3  | 0  | 0  | 1        | 0        | 1,68E+05 | 0        | 3,83E+05 | 5,54E+05 | 1,04E+05 | 1,31E+05 | 4        | 4        | 0        | 2        | 4 | 0  | 1  | 4  | 2  | 2 | 0  | 0  | 1  | 70499 |          |          |          |          |
| MG2        | Protein ma Q96A72 MG2 HUMA          | 74,23 | 18 | 18 | 18 | 0  | 0  | 18 | 18 | 18 | 0  | 0  | 18       | 1,18E+06 | 1,67E+06 | 5,49E+05 | 0        | 4,74E+06 | 4,76E+06 | 3,92E+05 | 0        | 2        | 2        | 4        | 3 | 2  | 0  | 0  | 7  | 5 | 1  | 0  | 0  | 1     | 17443    |          |          |          |
| MG3        | Protein ma P51236 MG3 HUMA          | 74,23 | 18 | 18 | 18 | 0  | 0  | 18 | 18 | 18 | 0  | 0  | 18       | 1,28E+06 | 1,57E+06 | 5,91E+05 | 0        | 4,74E+06 | 4,76E+06 | 3,92E+05 | 0        | 2        | 2        | 4        | 3 | 2  | 0  | 0  | 7  | 5 | 1  | 0  | 0  | 1     | 17166    |          |          |          |
| PCCA       | Propionyl-P-POS45 PCCA_HUMAN        | 74,13 | 2  | 2  | 2  | 2  | 3  | 2  | 2  | 2  | 2  | 2  | 4        | 4,76E+05 | 5,80E+05 | 9,30E+05 | 0        | 1,92E+05 | 8,30E+05 | 7,09E+05 | 1,09E+05 | 1,30E+05 | 1,56E+05 | 4,14E+05 | 3 | 3  | 2  | 2  | 1  | 3 | 2  | 2  | 2  | 1     | 3        | 80059    |          |          |
| ADA180GUS5 | Propionyl-tr ADA180GUS5 ADA1E       | 74,13 | 2  | 2  | 2  | 2  | 2  | 2  | 2  | 2  | 2  | 2  | 4        | 5,76E+05 | 5,80E+05 | 9,30E+05 | 0        | 1,92E+05 | 8,30E+05 | 7,09E+05 | 1,09E+05 | 1,30E+05 | 1,56E+05 | 4,14E+05 | 3 | 3  | 2  | 2  | 1  | 3 | 2  | 2  | 2  | 1     | 3        | 67352    |          |          |
| ADA180GWA4 | Propionyl-tr ADA180GWA4 ADA1E       | 74,13 | 3  | 3  | 3  | 3  | 3  | 3  | 3  | 3  | 3  | 3  | 3        | 6,47E+05 | 5,80E+05 | 9,30E+05 | 0        | 1,92E+05 | 8,30E+05 | 7,09E+05 | 1,09E+05 | 1,30E+05 | 1,56E+05 | 4,14E+05 | 3 | 3  | 2  | 2  | 1  | 3 | 2  | 2  | 2  | 2     | 1        | 3        | 50130    |          |
| RPA83      | DNA-directed P52341 RPA83_HUMAN     | 73,81 | 9  | 9  | 9  | 9  | 9  | 9  | 9  | 9  | 9  | 9  | 9        | 1,55E+05 | 2,78E+06 | 5,00E+05 | 0        | 7,94E+04 | 2,62E+05 | 4,80E+06 | 3,97E+05 | 6,29E+04 | 0        | 4        | 4 | 2  | 2  | 2  | 3  | 5 | 3  | 0  | 1  | 4     | Mutation |          |          |          |
| CSU141     | DNA-directed tr CSU141 CSU141_HUMAN | 73,81 | 27 | 9  | 0  | 0  | 0  | 20 | 0  | 0  | 0  | 0  | 0        | 9,15E+05 | 2,78E+06 | 5,00E+05 | 0        | 7,94E+04 | 2,62E+05 | 4,80E+06 | 3,97E+05 | 6,29E+04 | 0        | 4        | 4 | 2  | 2  | 2  | 3  | 5 | 3  | 0  | 1  | 4     | Mutation |          |          |          |
| NEDD8      | NEDD8 OS-Q15843 NEDD8_HUMA          | 73,65 | 17 | 17 | 17 | 17 | 17 | 17 | 17 | 17 | 17 | 17 | 17       | 3,05E+06 | 8,98E+06 | 7,53E+06 | 2,59E+05 | 1,01E+06 | 3,12E+06 | 7,38E+06 | 4,07E+06 | 6,51E+05 | 1,44E+06 | 7,86E+05 | 3 | 3  | 5  | 9  | 10 | 1 | 4  | 3  | 9  | 4     | 2        |          |          |          |
| EPLS17     | NEDD8-MC tr EPLS17 EPLS17_HUM       | 73,65 | 8  | 8  | 8  | 8  | 8  | 8  | 8  | 8  | 8  | 8  | 8        | 3,05E+06 | 8,98E+06 | 7,53E+06 | 2,59E+05 | 1,01E+06 | 3,12E+06 | 7,38E+06 | 4,07E+06 | 6,51E+05 | 1,44E+06 | 7,86E+05 | 2 | 2  | 5  | 9  | 10 | 1 | 4  | 3  | 9  | 4     | 2        |          |          |          |
| S4R319     | NEDD8 OS tr S4R319 S4R319_HUP       | 73,65 | 17 | 17 | 17 | 17 | 17 | 17 | 17 | 17 | 17 | 17 | 17       | 3,05E+06 | 8,98E+06 | 7,53E+06 | 2,59E+05 | 1,01E+06 | 3,12E+06 | 7,38E+06 | 4,07E+06 | 6,51E+05 | 1,44E+06 | 7,86E+05 | 2 | 2  | 5  | 9  | 10 | 1 | 4  | 3  | 9  | 4     | 2        |          |          |          |
| NEDD8-MC   | NEDD8-MC tr NEDD8-MC NEDD8_HUM      | 73,65 | 21 | 21 | 21 | 21 | 21 | 21 | 21 | 21 | 21 | 21 | 21       | 3,05E+06 | 8,98E+06 | 7,53E+06 | 2,59E+05 | 1,01E+06 | 3,12E+06 | 7,38E+06 | 4,07E+06 | 6,51E+05 | 1,44E+06 | 7,86E+05 | 2 | 2  | 5  | 9  | 10 | 1 | 4  | 3  | 9  | 4     | 2        |          |          |          |
| FVRS46     | NEDD8 OS tr FVRS46 FVRS46_HUM       | 73,65 | 28 | 28 | 28 | 28 | 28 | 28 | 28 | 28 | 28 | 28 | 28       | 3,05E+06 | 8,98E+06 | 7,53E+06 | 2,59E+05 | 1,01E+06 | 3,12E+06 | 7,38E+06 | 4,07E+06 | 6,51E+05 | 1,44E+06 | 7,86E+05 | 2 | 2  | 5  | 9  | 10 | 1 | 4  | 3  | 9  | 4     | 2        |          |          |          |
| RS23       | 40S ribosom P62266 RS23_HUMAN       | 73,61 | 16 | 16 | 16 | 0  | 8  | 16 | 16 | 0  | 0  | 0  | 0        | 6,58E+05 | 4,03E+06 | 4,45E+06 | 0        | 4,26E+05 | 6,86E+06 | 8,60E+06 | 2,35E+06 | 0        | 3        | 7        | 7 | 10 | 0  | 1  | 9  | 2 | 0  | 0  | 0  | 1     | 15808    |          |          |          |
| CS1P16     | Carfilage-a tr CS1P16 CS1P16_HUM    | 73,61 | 13 | 17 | 13 | 2  | 9  | 13 | 11 | 7  | 2  | 11 | 7,84E+06 | 7,61E+07 | 5,99E+06 | 2,14E+05 | 6,78E+05 | 1,21E+07 | 5,28E+06 | 2,32E+06 | 2,45E+04 | 2,22E+05 | 1,22E+06 | 9        | 8 | 7  | 11 | 10 | 1  | 6 | 11 | 7  | 9  | 2     | 1        | 5        | Mutation |          |
| CRTP       | Carfilage-a tr CRTP CRTP_HUMAN      | 73,61 | 12 | 15 | 12 | 2  | 8  | 13 | 12 | 10 | 6  | 2  | 10       | 7,84E+06 | 7,61E+07 | 5,99E+06 | 2,14E+05 | 6,78E+05 | 1,21E+07 | 5,28E+06 | 2,32E+06 | 2,45E+04 | 2,22E+05 | 1,22E+06 | 9 | 8  | 7  | 11 | 10 | 1 | 6  | 11 | 7  | 9     | 2        | 1        | 5        | Mutation |
| VATH       | V-type pro Q9U122 VATH_HUMAN        | 73,49 | 0  | 7  | 4  | 3  | 0  | 5  | 9  | 0  | 0  | 0  | 0        | 0        | 2,54E+04 | 0        | 0        | 2,54E+04 | 1,63E+05 | 7,62E+05 | 0        | 4        | 4        | 0        | 4 | 1  | 1  | 0  | 2  | 6 | 0  | 0  | 0  | 0     | 0        |          |          |          |
| G3V126     | V-type pro tr G3V126 G3V126_HUM     | 73,49 | 0  | 7  | 4  | 3  | 0  | 5  | 9  | 0  | 0  | 0  | 0        | 0        | 2,54E+04 | 0        | 0        | 2,54E+04 | 1,63E+05 | 7,62E+05 | 0        | 4        | 4        | 0        | 4 | 1  | 1  | 0  | 2  | 6 | 0  | 0  | 0  | 0     | 0        |          |          |          |
| EFM3       | Eukaryotic Q7L2H7 EFM3_HUMAN        | 73,3  | 0  | 9  | 7  | 2  | 0  | 7  | 10 | 0  | 0  | 0  | 4        | 4,95E+05 | 6,50E+04 | 0        | 0        | 4,95E+05 | 1,08E+06 | 0        | 0        | 4        | 4        | 0        | 3 | 4  | 0  | 3  | 2  | 3 | 2  | 3  | 0  | 0     | 1        | Mutation |          |          |
| HOYC08     | Eukaryotic tr HOYC08 HOYC08_HL      | 73,3  | 0  | 15 | 8  | 0  | 0  | 8  | 17 | 0  | 0  | 0  | 7        | 4,95E+05 | 6,50E+04 | 0        | 0        | 4,95E+05 | 1,08E+06 | 0        | 0        | 4        | 4        | 0        | 3 | 3  | 0  | 3  | 2  | 3 | 2  | 3  | 0  | 0     | 1        | Mutation |          |          |
| NDUC2      | NADH deH OS9298 NDUC2_HUMA          | 72,98 | 17 | 23 | 17 | 10 | 17 | 17 | 17 | 10 | 10 | 17 | 17       | 8,42E+06 | 1,49E+07 | 1,10E+07 | 2,30E+06 | 6,01E+06 | 1,64E+07 | 1,48E+07 | 5,93E+06 | 3,43E+06 | 2,49E+06 | 8,35E+06 | 5 | 5  | 8  | 6  | 6  | 1 | 7  | 4  | 8  | 3     | 3        | 4        |          |          |
| DGAT1      | Diacylglycer O75907 DGAT1_HUMA      | 72,89 | 4  | 4  | 4  | 0  | 4  | 4  | 4  | 4  | 4  | 4  | 4        | 3,66E+05 | 8,20E+05 | 2,43E+05 | 0        | 3,66E+05 | 8,20E+05 | 2,43E+05 | 0        | 4,32E+05 | 2,28E+05 | 0        | 3 | 3  | 2  | 2  | 2  | 2 | 2  | 2  | 2  | 2     | 0        | 0        |          |          |
| ADA040MR74 | Dynein light tr ADA040MR74 ADA04    | 72,89 | 7  | 7  | 7  | 0  | 0  | 7  | 7  | 7  | 0  | 0  | 0        | 3,66E+05 | 8,20E+05 | 2,43E+05 | 0        | 3,66E+05 | 8,20E+05 | 2,43E+05 | 0        | 4,32E+05 | 2,28E+05 | 0        | 2 | 2  | 2  | 2  | 2  | 2 | 2  | 2  | 2  | 2     | 0        | 0        |          |          |
| H3BQ11     | Dynein light tr H3BQ11 H3BQ11_HUI   | 72,77 | 14 | 14 | 14 | 0  | 14 | 14 | 14 | 14 | 14 | 14 | 14       | 10       | 7,79E+05 | 2,48E+06 | 2,58E+06 | 0        | 2,95E+06 | 4,00E+06 | 1,20E+05 | 0        | 5,20E+04 | 2,09E+05 | 4 | 4  | 4  | 7  | 6  | 9 | 0  | 1  | 6  | 12    | 7        | 1        | 3        |          |
| DLR2       | Dynein light Q8T709 DLR2_HUMAN      | 72,77 | 19 | 19 | 19 | 0  | 19 | 19 | 19 | 19 | 19 | 19 | 19       | 12       | 7,79E+05 | 2,48E+06 | 2,58E+06 | 0        | 2,95E+06 | 4,00E+06 | 1,20E+05 | 0        | 5,20E+04 | 2,09E+05 | 4 | 4  | 4  | 7  | 6  | 9 | 0  | 1  | 6  | 12    | 7        | 1        | 3        |          |
| GGS1       | Rap1 GTP tr GGS1 GGS1_HUMAN         | 72,63 | 2  | 7  | 5  | 0  | 5  | 5  | 5  | 5  | 5  | 5  | 3        | 1,45E+06 | 9,78E+06 | 5,26E+06 | 0        | 1,45E+06 | 9,78E+06 | 5,26E+06 | 0        | 2,76E+06 | 0        | 2        | 5 | 4  | 0  | 4  | 0  | 5 | 4  | 0  | 0  | 2     | 0        | 2        |          |          |
| HOY8M2     | Rap1 GTP tr HOY8M2 HOY8M2_H         | 72,63 | 5  | 12 | 12 | 0  | 12 | 12 | 12 | 12 | 12 | 12 | 0        | 1,45E+06 | 9,78E+06 | 5,26E+06 | 0        | 1,45E+06 | 9,78E+06 | 5,26E+06 | 0        | 2,76E+06 | 0        | 2        | 5 | 4  | 0  | 4  | 0  | 5 | 4  | 0  | 0  | 2     | 0        | 2        |          |          |
| ARPC5      | Actin-relat O15511 ARPC5_HUMAN      | 72,54 | 29 | 29 | 29 | 0  | 13 | 13 | 21 | 29 | 13 | 21 | 13       | 1,37E+07 | 1,75E+07 | 1,55E+07 | 2,28E+06 | 1,59E+07 | 2,22E+07 | 1,17E+07 | 3,10E+06 | 5,18E+05 | 4,55E+06 | 5        | 3 | 11 | 10 | 10 | 0  | 5 | 6  | 6  | 7  | 5     | 3        | 6        |          |          |
| BLVR8      | Flavin reductase P30043 BLVR8_HUMAN | 72,51 | 5  | 13 | 23 | 0  | 0  | 13 | 13 | 13 | 0  | 0  | 0        | 5,72E+05 | 3,98E+06 | 5,01E+06 | 0        | 5,72E+05 | 3,98E+06 | 5,01E+06 | 0        | 4        | 4        | 1        | 6 | 8  | 0  | 2  | 3  | 6 | 0  | 0  | 0  | 0     | 0        | 0        |          |          |
| MOR192     | Flavin reductase tr MOR192 MOR192_H | 72,51 | 0  | 10 | 23 | 0  | 0  | 10 | 10 | 10 | 0  | 0  | 0        | 5,72E+05 | 3,98E+06 | 5,01E+06 | 0        | 5,72E+05 | 3,98E+06 | 5,01E+06 | 0        | 4        | 4        | 1        | 6 | 8  | 0  | 2  | 3  | 6 | 0  | 0  | 0  | 0     | 0        | 0        |          |          |
| ADA7POT409 | Dnaj homo tr ADA7POT409 ADA7P       | 72,45 | 2  | 5  | 4  | 1  | 1  | 1  | 1  | 1  | 1  | 1  | 1        | 1,60E+06 | 5,50E+06 | 4,18E+06 | 0        | 1,60E+06 | 5,50E+06 | 4,18E+06 | 0        | 9,14E+06 | 2,90E+07 | 1,06E+06 | 0 | 5  | 5  | 6  | 6  | 9 | 1  | 2  | 10 | 11    | 4        | 2        | 2        |          |
| ADA7POT431 | Dnaj homo tr ADA7POT431 ADA7P       | 72,45 | 2  | 5  | 4  | 1  | 1  | 1  | 1  | 1  | 1  | 1  | 1        | 1,60E+06 | 5,50E+06 | 4,18E+06 | 0        | 1,60E+06 | 5,50E+06 | 4,18E+06 | 0        | 9,14E+06 | 2,90E+07 | 1,06E+06 | 0 | 5  | 5  | 6  | 6  | 9 | 1  | 2  | 10 | 11    | 4        | 2        | 2        |          |
| DC10       | Dnaj homo Q80X81 DC10_HUMAN         | 72,45 | 2  | 5  | 4  | 1  | 1  | 1  | 1  | 1  | 1  | 1  | 1        | 1,60E+06 | 5,50E+06 | 4,18E+06 | 0        | 1,60E+06 | 5,50E+06 | 4,18E+06 | 0        | 9,14E+06 | 2,90E+07 | 1,06E+06 | 0 | 5  | 5  | 6  | 6  | 9 | 1  | 2  | 10 | 11    | 4        | 2        | 2        |          |
| ADA7POT897 | Dnaj homo tr ADA7POT897 ADA7P       | 72,45 | 3  | 6  | 5  | 1  | 1  | 1  | 1  | 1  | 1  | 1  | 1        | 1,60E+06 | 5,50E+06 | 4,18E+06 | 0        | 1,60E+06 | 5,50E+06 | 4,18E+06 | 0        | 9,14E+06 | 2,90E+07 | 1,06E+06 | 0 | 5  | 5  | 6  | 6  | 9 | 1  | 2  | 10 | 11    | 4        | 2        | 2        |          |
| ADA7POT883 | Dnaj homo tr ADA7POT883 ADA7P       | 72,45 | 8  | 12 | 12 | 3  | 3  | 19 | 19 | 12 | 3  |    |          |          |          |          |          |          |          |          |          |          |          |          |   |    |    |    |    |   |    |    |    |       |          |          |          |          |









|            |                                  |       |    |    |    |   |    |    |    |   |   |    |          |          |          |          |          |          |          |          |          |   |   |   |   |   |   |   |   |   |   |   |   |   |          |            |          |          |        |
|------------|----------------------------------|-------|----|----|----|---|----|----|----|---|---|----|----------|----------|----------|----------|----------|----------|----------|----------|----------|---|---|---|---|---|---|---|---|---|---|---|---|---|----------|------------|----------|----------|--------|
| A0A5F9ZHN9 | Aldehyde d tr A0A5F9ZHN9 A0A5F   | 53.5  | 4  | 6  | 4  | 0 | 4  | 7  | 4  | 0 | 0 | 4  | 6        | 0        | 4,32E+05 | 0        | 0        | 8,38E+05 | 4,58E+05 | 0        | 2,83E+05 | 4 | 3 | 5 | 3 | 2 | 0 | 2 | 5 | 3 | 0 | 0 | 4 | 4 | Deamidat | 58681      |          |          |        |
| AL3A2      | Aldehyde d P51648 AL3A2_HUMAN    | 53.5  | 4  | 6  | 4  | 0 | 4  | 7  | 4  | 0 | 0 | 4  | 7        | 0        | 4,32E+05 | 0        | 0        | 8,38E+05 | 4,58E+05 | 0        | 2,83E+05 | 4 | 3 | 5 | 3 | 2 | 0 | 2 | 5 | 3 | 0 | 0 | 4 | 4 | Deamidat | 54848      |          |          |        |
| A0A5F9ZQX4 | Aldehyde d tr A0A5F9ZQX4 A0A5F   | 53.5  | 4  | 7  | 4  | 0 | 4  | 7  | 4  | 0 | 0 | 4  | 7        | 0        | 4,32E+05 | 0        | 0        | 8,38E+05 | 4,58E+05 | 0        | 2,83E+05 | 4 | 3 | 5 | 3 | 2 | 0 | 2 | 5 | 3 | 0 | 0 | 4 | 4 | Deamidat | 51399      |          |          |        |
| A0A5F9Z12  | Aldehyde d tr A0A5F9Z12 A0A5F    | 53.5  | 5  | 5  | 5  | 0 | 5  | 6  | 5  | 5 | 0 | 5  | 8        | 0        | 1,19E+05 | 0        | 0        | 6,10E+05 | 4,58E+05 | 0        | 2,83E+05 | 3 | 2 | 5 | 2 | 2 | 0 | 2 | 4 | 3 | 0 | 0 | 4 | 4 | Deamidat | 43809      |          |          |        |
| J3QRD1     | Aldehyde d tr J3QRD1 J3QRD1_H    | 53.5  | 5  | 5  | 5  | 0 | 5  | 6  | 5  | 0 | 0 | 5  | 8        | 0        | 1,19E+05 | 0        | 0        | 6,10E+05 | 4,58E+05 | 0        | 2,83E+05 | 3 | 2 | 5 | 2 | 2 | 0 | 2 | 4 | 3 | 0 | 0 | 4 | 4 | Deamidat | 44648      |          |          |        |
| A0A5F9ZHS  | Aldehyde d tr A0A5F9ZHS A0A5F    | 53.5  | 5  | 5  | 5  | 0 | 5  | 6  | 5  | 0 | 0 | 5  | 8        | 0        | 1,19E+05 | 0        | 0        | 6,10E+05 | 4,58E+05 | 0        | 2,83E+05 | 3 | 2 | 5 | 2 | 2 | 0 | 2 | 4 | 3 | 0 | 0 | 4 | 4 | Deamidat | 45519      |          |          |        |
| A0A180K7   | ORM1-like tr A0A180K7 A0A18      | 53.36 | 24 | 10 | 10 | 0 | 10 | 24 | 10 | 0 | 0 | 10 | 7        | 0        | 1,52E+06 | 1,06E+06 | 6,08E+05 | 1,85E+06 | 2,20E+05 | 4,86E+05 | 7,82E+05 | 2 | 2 | 3 | 3 | 4 | 0 | 2 | 4 | 2 | 2 | 0 | 0 | 2 | Mutation | 12270      |          |          |        |
| ORML1      | ORM1-like QP9553 ORML1_HUMA      | 53.36 | 17 | 7  | 7  | 0 | 7  | 17 | 7  | 0 | 0 | 7  | 7        | 0        | 1,52E+06 | 1,06E+06 | 6,08E+05 | 1,85E+06 | 2,20E+05 | 4,86E+05 | 7,82E+05 | 2 | 2 | 3 | 3 | 4 | 0 | 2 | 4 | 2 | 2 | 0 | 0 | 2 | Mutation | 17371      |          |          |        |
| FWX74      | ORM1-like tr FWX74 FWX74_H       | 53.26 | 24 | 10 | 10 | 0 | 10 | 24 | 10 | 0 | 0 | 10 | 7        | 0        | 1,52E+06 | 1,06E+06 | 6,08E+05 | 1,85E+06 | 2,20E+05 | 4,86E+05 | 7,82E+05 | 2 | 2 | 3 | 3 | 4 | 0 | 2 | 4 | 2 | 2 | 0 | 0 | 2 | Mutation | 15522      |          |          |        |
| ORML2      | ORM1-like Q53FV1 ORML2_HUMA      | 53.36 | 17 | 7  | 7  | 0 | 7  | 17 | 7  | 0 | 0 | 7  | 7        | 0        | 1,52E+06 | 1,06E+06 | 6,08E+05 | 1,85E+06 | 2,20E+05 | 4,86E+05 | 7,82E+05 | 2 | 2 | 3 | 3 | 4 | 0 | 2 | 4 | 2 | 2 | 0 | 0 | 2 | Mutation | 17363      |          |          |        |
| CCD80      | Coiled-coil Q76M96 CCD80_HUMF    | 53.35 | 1  | 4  | 0  | 0 | 1  | 1  | 1  | 0 | 0 | 0  | 8,37E+05 | 5,32E+05 | 8,84E+05 | 0        | 0        | 6,52E+05 | 0        | 0        | 0        | 5 | 5 | 1 | 7 | 4 | 0 | 2 | 1 | 2 | 0 | 0 | 0 | 0 | Deamidat | 108174     |          |          |        |
| PP30       | PSME3-int tr Q9ZU20 PP30_HUMAF   | 53.26 | 0  | 6  | 6  | 0 | 6  | 6  | 6  | 3 | 0 | 0  | 0        | 0        | 0        | 0        | 0        | 7,53E+04 | 0        | 0        | 0        | 3 | 2 | 0 | 1 | 3 | 0 | 0 | 1 | 2 | 1 | 1 | 0 | 0 | 0        | Mutation   | 28912    |          |        |
| H3B033     | PSME3-int tr H3B033 H3B033_H     | 53.26 | 0  | 6  | 6  | 0 | 6  | 6  | 6  | 3 | 0 | 0  | 0        | 0        | 0        | 0        | 0        | 7,53E+04 | 0        | 0        | 0        | 3 | 2 | 0 | 1 | 3 | 0 | 0 | 1 | 2 | 1 | 1 | 0 | 0 | 0        | Mutation   | 19352    |          |        |
| H3BUL4     | PSME3-int tr H3BUL4 H3BUL4_H     | 53.26 | 0  | 9  | 9  | 0 | 9  | 9  | 9  | 5 | 0 | 0  | 0        | 0        | 0        | 0        | 0        | 7,53E+04 | 0        | 0        | 0        | 3 | 2 | 0 | 1 | 3 | 0 | 0 | 1 | 2 | 1 | 1 | 0 | 0 | 0        | Mutation   | 19371    |          |        |
| H3BMX9     | PSME3-int tr H3BMX9 H3BMX9_H     | 53.26 | 0  | 9  | 9  | 0 | 9  | 9  | 9  | 5 | 0 | 0  | 0        | 0        | 0        | 0        | 0        | 7,53E+04 | 0        | 0        | 0        | 3 | 2 | 0 | 1 | 3 | 0 | 0 | 1 | 2 | 1 | 1 | 0 | 0 | 0        | Mutation   | 19818    |          |        |
| H3BP64     | PSME3-int tr H3BP64 H3BP64_H     | 53.26 | 0  | 10 | 10 | 0 | 10 | 10 | 10 | 5 | 0 | 0  | 0        | 0        | 0        | 0        | 0        | 7,53E+04 | 0        | 0        | 0        | 3 | 2 | 0 | 1 | 3 | 0 | 0 | 1 | 2 | 1 | 1 | 0 | 0 | 0        | Mutation   | 18125    |          |        |
| H3BT8      | PSME3-int tr H3BT8 H3BT8_HU      | 53.26 | 0  | 12 | 12 | 0 | 12 | 12 | 12 | 6 | 0 | 0  | 0        | 0        | 0        | 0        | 0        | 7,53E+04 | 0        | 0        | 0        | 3 | 2 | 0 | 1 | 3 | 0 | 0 | 1 | 2 | 1 | 1 | 0 | 0 | 0        | Mutation   | 16025    |          |        |
| H3B0Q6     | PSME3-int tr H3B0Q6 H3B0Q6_H     | 53.26 | 0  | 11 | 11 | 0 | 11 | 11 | 11 | 6 | 0 | 0  | 0        | 0        | 0        | 0        | 0        | 7,53E+04 | 0        | 0        | 0        | 3 | 2 | 0 | 1 | 3 | 0 | 0 | 1 | 2 | 1 | 1 | 0 | 0 | 0        | Mutation   | 17177    |          |        |
| H3B0Q6     | PSME3-int tr H3B0Q6 H3B0Q6_H     | 53.26 | 0  | 16 | 16 | 0 | 16 | 16 | 16 | 6 | 0 | 0  | 0        | 0        | 0        | 0        | 0        | 7,53E+04 | 0        | 0        | 0        | 3 | 2 | 0 | 1 | 3 | 0 | 0 | 1 | 2 | 1 | 0 | 0 | 0 | 0        | Mutation   | 11814    |          |        |
| H3BT2      | PSME3-int tr H3BT2 H3BT2_HU      | 53.26 | 0  | 14 | 14 | 0 | 14 | 14 | 14 | 0 | 0 | 0  | 0        | 0        | 0        | 0        | 0        | 7,53E+04 | 0        | 0        | 0        | 2 | 2 | 0 | 1 | 3 | 0 | 0 | 1 | 2 | 1 | 0 | 0 | 0 | 0        | Mutation   | 13124    |          |        |
| EP9NM1     | Squalene s tr EP9NM1 EP9NM1_H    | 53.25 | 0  | 4  | 4  | 0 | 4  | 4  | 4  | 0 | 0 | 0  | 0        | 0        | 0        | 3,70E+05 | 4,09E+05 | 0        | 0        | 0        | 2        | 2 | 0 | 1 | 3 | 0 | 0 | 0 | 1 | 2 | 1 | 0 | 0 | 1 | 0        | 0          | Mutation | 47285    |        |
| FDPT       | Squalene s P37268 FDPT_HUMAN     | 53.25 | 0  | 4  | 4  | 0 | 4  | 4  | 4  | 0 | 0 | 0  | 0        | 0        | 0        | 3,70E+05 | 4,09E+05 | 0        | 0        | 0        | 2        | 2 | 0 | 1 | 3 | 0 | 0 | 0 | 1 | 2 | 1 | 0 | 0 | 1 | 0        | 0          | Mutation | 48115    |        |
| A0A1W2PQ47 | Squalene s tr A0A1W2PQ47 A0A1    | 53.25 | 0  | 4  | 4  | 0 | 4  | 4  | 4  | 0 | 0 | 0  | 0        | 0        | 0        | 3,70E+05 | 4,09E+05 | 0        | 0        | 0        | 2        | 2 | 0 | 1 | 3 | 0 | 0 | 0 | 1 | 2 | 1 | 0 | 0 | 0 | 0        | 0          | Mutation | 53629    |        |
| H7C393     | Acylamino- tr H7C393 H7C393_HU   | 53.1  | 0  | 5  | 5  | 0 | 7  | 5  | 5  | 5 | 7 | 5  | 1,36E+06 | 0        | 1,88E+05 | 1,37E+06 | 3,60E+06 | 0        | 4,78E+05 | 0        | 3,98E+05 | 4 | 4 | 0 | 2 | 4 | 0 | 0 | 3 | 6 | 4 | 4 | 2 | 2 | 2        | Carboxylat | 31904    |          |        |
| H7C1U0     | Acylamino- tr H7C1U0 H7C1U0_H    | 53.1  | 0  | 4  | 4  | 0 | 6  | 4  | 4  | 4 | 7 | 4  | 1,36E+06 | 0        | 1,88E+05 | 1,37E+06 | 3,60E+06 | 0        | 4,78E+05 | 0        | 3,98E+05 | 4 | 4 | 0 | 2 | 4 | 0 | 0 | 3 | 6 | 4 | 4 | 2 | 2 | 2        | Carboxylat | 34583    |          |        |
| ACPH       | Acylamino- P13798 ACPH_HUMAN     | 53.1  | 0  | 2  | 2  | 0 | 3  | 2  | 2  | 2 | 2 | 2  | 1,36E+06 | 0        | 1,88E+05 | 1,37E+06 | 3,60E+06 | 0        | 4,78E+05 | 0        | 3,98E+05 | 4 | 4 | 0 | 2 | 4 | 0 | 0 | 3 | 6 | 4 | 4 | 2 | 2 | 2        | Carboxylat | 81225    |          |        |
| CS19F      | Acyl-glycyl tr CS19F CS19F_HUMA  | 53.1  | 0  | 2  | 2  | 0 | 3  | 2  | 2  | 2 | 2 | 2  | 1,36E+06 | 0        | 1,88E+05 | 1,37E+06 | 3,60E+06 | 0        | 4,78E+05 | 0        | 3,98E+05 | 4 | 4 | 0 | 2 | 4 | 0 | 0 | 3 | 6 | 4 | 4 | 2 | 2 | 2        | Carboxylat | 81674    |          |        |
| CS1K2      | Acylamino- tr CS1K2 CS1K2_HU     | 53.1  | 0  | 6  | 6  | 0 | 9  | 6  | 6  | 6 | 6 | 6  | 1,36E+06 | 0        | 1,88E+05 | 1,37E+06 | 3,60E+06 | 0        | 4,78E+05 | 0        | 3,98E+05 | 4 | 4 | 0 | 2 | 4 | 0 | 0 | 3 | 6 | 4 | 4 | 2 | 2 | 2        | Carboxylat | 26029    |          |        |
| C9IA08     | 60S ribosom tr C9IA08 C9IA08_HU  | 53.08 | 3  | 0  | 2  | 4 | 0  | 3  | 3  | 2 | 0 | 0  | 0        | 0        | 0        | 1,97E+05 | 0        | 5,20E+04 | 0        | 0        | 0        | 4 | 4 | 2 | 0 | 1 | 2 | 0 | 1 | 2 | 1 | 0 | 0 | 0 | 0        | Mutation   | 60126    |          |        |
| NMD3       | 60S ribosom Q96046 NMD3_HUMA     | 53.08 | 3  | 0  | 2  | 4 | 0  | 3  | 3  | 3 | 0 | 0  | 0        | 0        | 0        | 1,97E+05 | 0        | 5,20E+04 | 0        | 0        | 0        | 4 | 4 | 2 | 0 | 1 | 2 | 0 | 1 | 2 | 1 | 0 | 0 | 0 | 0        | Mutation   | 57603    |          |        |
| SPHM       | N-subpog P51688 SPHM_HUMAN       | 53.08 | 0  | 3  | 6  | 2 | 2  | 3  | 3  | 3 | 0 | 2  | 5        | 0        | 1,18E+05 | 5,73E+05 | 0        | 1,62E+05 | 3,00E+05 | 2,59E+05 | 0        | 0 | 0 | 0 | 0 | 0 | 0 | 1 | 3 | 1 | 2 | 1 | 1 | 0 | 0        | 0          | Mutation | 56695    |        |
| PKH2       | Importin tr Q8T55 PKH2_HUMAN     | 53.23 | 8  | 11 | 0  | 0 | 3  | 3  | 3  | 3 | 0 | 0  | 0        | 0        | 0        | 0        | 0        | 0        | 0        | 0        | 0        | 3 | 3 | 3 | 3 | 4 | 0 | 0 | 2 | 1 | 1 | 0 | 0 | 0 | 0        | 0          | 0        | Mutation | 3356   |
| IMA7       | Importin s Q65641 IMA7_HUMAN     | 52.77 | 0  | 3  | 3  | 0 | 3  | 3  | 3  | 5 | 0 | 0  | 0        | 0        | 0        | 0        | 0        | 0        | 0        | 0        | 0        | 2 | 2 | 0 | 0 | 1 | 0 | 0 | 0 | 2 | 3 | 0 | 0 | 0 | 0        | 0          | 0        | Mutation | 60030  |
| TXD12      | Thioredoxin Q95881 TXD12_HUMAN   | 52.77 | 14 | 14 | 23 | 0 | 14 | 23 | 14 | 0 | 0 | 0  | 5        | 1,80E+06 | 1,48E+06 | 3,71E+06 | 0        | 0        | 1,30E+06 | 6,51E+06 | 3,89E+05 | 0 | 3 | 3 | 4 | 2 | 5 | 0 | 0 | 3 | 5 | 2 | 0 | 0 | 0        | 0          | 0        | Mutation | 19206  |
| CD5A3      | Eukaryotic tr P25940 CD5A3_HUMAN | 52.71 | 1  | 1  | 0  | 0 | 2  | 0  | 0  | 0 | 0 | 0  | 0        | 0        | 0        | 0        | 0        | 0        | 0        | 0        | 0        | 2 | 1 | 2 | 2 | 0 | 0 | 0 | 0 | 0 | 0 | 0 | 0 | 0 | 0        | 0          | 0        | Mutation | 172120 |
| A0A72VZ4E4 | Eukaryotic tr A0A72VZ4E4 A0A72   | 52.69 | 8  | 5  | 5  | 0 | 5  | 5  | 16 | 5 | 5 | 5  | 0        | 1,83E+06 | 4,53E+06 | 4,33E+06 | 0        | 5,87E+06 | 5,81E+06 | 3,50E+06 | 2,68E+05 | 0 | 5 | 5 | 3 | 4 | 0 | 1 | 4 | 2 | 8 | 3 | 1 | 0 | 0        | 0          | 0        | Mutation | 27058  |
| IFH        | Eukaryotic Q15565 IFH_HUMAN      | 52.69 | 8  | 5  | 5  | 0 | 5  | 5  | 15 | 5 | 5 | 5  | 0        | 1,83E+06 | 4,53E+06 | 4,33E+06 | 0        | 5,87E+06 | 5,81E+06 | 3,50E+06 | 2,68E+05 | 0 | 5 | 5 | 3 | 4 | 0 | 1 | 4 | 2 | 8 | 3 | 1 | 0 | 0        | 0          | 0        | Mutation | 27058  |
| A0A72VZ85  | Eukaryotic tr A0A72VZ85 A0A72    | 52.69 | 10 | 7  | 7  | 0 | 7  | 19 | 7  | 7 | 7 | 7  | 0        | 1,83E+06 | 4,53E+06 | 4,33E+06 | 0        |          |          |          |          |   |   |   |   |   |   |   |   |   |   |   |   |   |          |            |          |          |        |



|            |                                        |       |    |    |    |    |    |    |    |    |    |    |    |          |          |          |          |          |          |          |          |          |          |          |   |   |   |   |   |   |   |   |   |   |   |   |   |          |            |            |
|------------|----------------------------------------|-------|----|----|----|----|----|----|----|----|----|----|----|----------|----------|----------|----------|----------|----------|----------|----------|----------|----------|----------|---|---|---|---|---|---|---|---|---|---|---|---|---|----------|------------|------------|
| J3QT6      | MCO5 con tr J3QT6 J3QT6_HUI            | 47.61 | 10 | 9  | 6  | 6  | 6  | 6  | 6  | 10 | 10 | 10 | 6  | 1.21E+06 | 2.02E+06 | 8.27E+05 | 1.30E+05 | 7.46E+05 | 1.99E+06 | 1.22E+06 | 4.95E+05 | 4.84E+05 | 2.70E+05 | 6.62E+05 | 3 | 3 | 3 | 4 | 1 | 2 | 3 | 2 | 2 | 2 | 2 | 2 | 3 | 28817    |            |            |
| HQV22      | MCO5 con tr HQV22 HQV22_HUI            | 47.61 | 10 | 10 | 10 | 10 | 10 | 10 | 10 | 10 | 10 | 10 | 10 | 1.21E+06 | 1.72E+06 | 8.27E+05 | 1.30E+05 | 7.46E+05 | 1.99E+06 | 1.22E+06 | 4.95E+05 | 4.84E+05 | 2.70E+05 | 6.62E+05 | 3 | 3 | 3 | 4 | 1 | 2 | 3 | 2 | 2 | 2 | 2 | 2 | 2 | 3        | 18874      |            |
| SNK5       | Sortin-like 5 SNK5_HUMAN               | 47.55 | 3  | 3  | 3  | 3  | 3  | 3  | 3  | 3  | 3  | 3  | 3  | 2.98E+05 | 0        | 2.71E+05 | 0        | 1.71E+05 | 4.64E+05 | 6.36E+05 | 1.88E+05 | 8.32E+04 | 1.45E+05 | 1.77E+05 | 2 | 2 | 2 | 2 | 2 | 2 | 2 | 2 | 2 | 2 | 2 | 2 | 1 | 3        | 16630      |            |
| H3BMF4     | Protein spi tr H3BMF4 H3BMF4_H         | 47.55 | 2  | 2  | 2  | 2  | 2  | 2  | 2  | 2  | 2  | 2  | 2  | 2.98E+05 | 0        | 2.71E+05 | 0        | 1.71E+05 | 4.64E+05 | 6.36E+05 | 1.88E+05 | 8.32E+04 | 1.45E+05 | 1.77E+05 | 2 | 2 | 2 | 2 | 2 | 2 | 2 | 2 | 2 | 2 | 2 | 1 | 3 | 61106    |            |            |
| H3BR82     | Protein spi tr H3BR82 H3BR82_H         | 47.55 | 3  | 3  | 3  | 3  | 3  | 3  | 3  | 3  | 3  | 3  | 3  | 2.98E+05 | 0        | 2.71E+05 | 0        | 1.71E+05 | 4.64E+05 | 6.36E+05 | 1.88E+05 | 8.32E+04 | 1.45E+05 | 1.77E+05 | 1 | 1 | 1 | 2 | 1 | 0 | 1 | 2 | 4 | 2 | 1 | 1 | 3 | 57191    |            |            |
| H3BPQ9     | Protein spi tr H3BPQ9 H3BPQ9_H         | 47.55 | 5  | 5  | 5  | 5  | 5  | 5  | 5  | 5  | 5  | 5  | 5  | 2.98E+05 | 0        | 2.71E+05 | 0        | 1.71E+05 | 4.64E+05 | 6.36E+05 | 1.88E+05 | 8.32E+04 | 1.45E+05 | 1.77E+05 | 1 | 1 | 1 | 2 | 1 | 0 | 1 | 2 | 3 | 2 | 1 | 1 | 3 | 26622    |            |            |
| H3BT44     | Protein spi tr H3BT44 H3BT44_H         | 47.55 | 8  | 8  | 8  | 8  | 8  | 8  | 8  | 8  | 8  | 8  | 8  | 2.98E+05 | 0        | 2.71E+05 | 0        | 1.71E+05 | 4.64E+05 | 6.36E+05 | 1.88E+05 | 8.32E+04 | 1.45E+05 | 1.77E+05 | 1 | 1 | 1 | 2 | 1 | 0 | 1 | 2 | 3 | 2 | 1 | 1 | 3 | 18968    |            |            |
| MOR0P0     | 40S ribosom tr MOR0P0 MOR0P0_H         | 47.54 | 12 | 12 | 12 | 12 | 12 | 12 | 12 | 12 | 12 | 12 | 12 | 0        | 3.11E+05 | 0        | 0        | 2.39E+06 | 3.48E+06 | 1.14E+06 | 0        | 0        | 0        | 1.11E+06 | 6 | 6 | 6 | 1 | 1 | 1 | 2 | 0 | 0 | 0 | 0 | 0 | 2 | 0        | Phosphoryl |            |
| R55        | 40S ribosom P46782 R55_HUMAN           | 47.54 | 4  | 11 | 7  | 9  | 0  | 11 | 11 | 11 | 0  | 9  | 0  | 3.11E+05 | 0        | 7.02E+05 | 0        | 2.39E+06 | 3.48E+06 | 1.14E+06 | 0        | 0        | 0        | 1.11E+06 | 6 | 6 | 6 | 1 | 2 | 2 | 1 | 0 | 3 | 4 | 2 | 0 | 2 | 0        | Phosphoryl |            |
| MOR0R2     | 40S ribosom tr MOR0R2 MOR0R2_H         | 47.54 | 4  | 10 | 6  | 8  | 0  | 10 | 10 | 10 | 0  | 8  | 0  | 3.11E+05 | 0        | 7.02E+05 | 0        | 2.39E+06 | 3.48E+06 | 1.14E+06 | 0        | 0        | 0        | 1.11E+06 | 6 | 6 | 6 | 1 | 2 | 2 | 1 | 0 | 3 | 4 | 2 | 0 | 2 | 0        | Phosphoryl |            |
| MOQ2N2     | 40S ribosom tr MOQ2N2 MOQ2N2_I         | 47.54 | 7  | 17 | 10 | 13 | 0  | 17 | 17 | 17 | 0  | 14 | 0  | 3.11E+05 | 0        | 7.02E+05 | 0        | 2.39E+06 | 3.48E+06 | 1.14E+06 | 0        | 0        | 0        | 1.11E+06 | 6 | 6 | 6 | 1 | 2 | 2 | 1 | 0 | 3 | 4 | 2 | 0 | 2 | 0        | Phosphoryl |            |
| PGAM5      | Sortin-like 5 PGAM5_HUMAN              | 47.47 | 7  | 7  | 7  | 7  | 7  | 7  | 7  | 7  | 7  | 7  | 7  | 4        | 1.31E+06 | 1.96E+06 | 1.68E+05 | 1.98E+05 | 2.19E+06 | 9.12E+05 | 0        | 4.80E+05 | 1.80E+05 | 9.01E+05 | 1 | 1 | 1 | 1 | 1 | 1 | 1 | 2 | 0 | 0 | 0 | 0 | 0 | 0        | 16703      |            |
| ACATN      | Acetyl-coe tr ACATN ACATN_HUMAN        | 47.38 | 3  | 3  | 3  | 3  | 3  | 3  | 3  | 3  | 3  | 3  | 3  | 0        | 1.09E+05 | 2.80E+05 | 3.81E+05 | 0        | 1.14E+06 | 1.00E+06 | 0        | 1.63E+06 | 0        | 0        | 0 | 2 | 2 | 2 | 1 | 1 | 2 | 0 | 0 | 3 | 2 | 1 | 1 | 0        | 0          | 40609      |
| ADA2R8Y359 | Acetyl-coe tr ADA2R8Y359 ADA2R8Y359_H  | 47.38 | 5  | 5  | 5  | 5  | 5  | 5  | 5  | 5  | 5  | 5  | 5  | 0        | 1.09E+05 | 2.80E+05 | 3.81E+05 | 0        | 1.14E+06 | 1.00E+06 | 0        | 0        | 0        | 0        | 1 | 1 | 1 | 1 | 1 | 1 | 2 | 0 | 0 | 3 | 2 | 1 | 0 | 0        | 29598      |            |
| H7C532     | Acetyl-coe tr H7C532 H7C532_HU         | 47.38 | 4  | 4  | 4  | 4  | 4  | 4  | 4  | 4  | 4  | 4  | 4  | 0        | 1.09E+05 | 2.80E+05 | 3.81E+05 | 0        | 1.14E+06 | 1.00E+06 | 0        | 0        | 0        | 0        | 1 | 1 | 1 | 1 | 1 | 1 | 2 | 0 | 0 | 3 | 2 | 1 | 0 | 0        | 37160      |            |
| ADA2R8Y57  | Acetyl-coe tr ADA2R8Y57 ADA2R8Y57_H    | 47.38 | 3  | 3  | 3  | 3  | 3  | 3  | 3  | 3  | 3  | 3  | 3  | 0        | 1.09E+05 | 2.80E+05 | 3.81E+05 | 0        | 1.14E+06 | 1.00E+06 | 0        | 0        | 0        | 0        | 1 | 1 | 1 | 1 | 1 | 1 | 2 | 0 | 0 | 3 | 2 | 1 | 0 | 0        | 49481      |            |
| ADA2R8Y55  | Acetyl-coe tr ADA2R8Y55 ADA2R8Y55_H    | 47.38 | 4  | 4  | 4  | 4  | 4  | 4  | 4  | 4  | 4  | 4  | 4  | 0        | 1.09E+05 | 2.80E+05 | 3.81E+05 | 0        | 1.14E+06 | 1.00E+06 | 0        | 0        | 0        | 0        | 1 | 1 | 1 | 1 | 1 | 1 | 2 | 0 | 0 | 3 | 2 | 1 | 0 | 0        | 44471      |            |
| ADA2R8YK5  | Acetyl-coe tr ADA2R8YK5 ADA2R8YK5_H    | 47.38 | 5  | 5  | 5  | 5  | 5  | 5  | 5  | 5  | 5  | 5  | 5  | 0        | 1.09E+05 | 2.80E+05 | 3.81E+05 | 0        | 1.14E+06 | 1.00E+06 | 0        | 0        | 0        | 0        | 1 | 1 | 1 | 1 | 1 | 1 | 2 | 0 | 0 | 3 | 2 | 1 | 0 | 0        | 29350      |            |
| ADA2R8Y6H1 | Uncharacter tr ADA2R8Y6H1 ADA2R8Y6H1_H | 47.38 | 4  | 4  | 4  | 4  | 4  | 4  | 4  | 4  | 4  | 4  | 4  | 0        | 1.09E+05 | 2.80E+05 | 3.81E+05 | 0        | 1.14E+06 | 1.00E+06 | 0        | 0        | 0        | 0        | 1 | 1 | 1 | 1 | 1 | 1 | 2 | 0 | 0 | 3 | 2 | 1 | 0 | 0        | 38355      |            |
| G3PT       | Glyceralde 14556 G3PT_HUMAN            | 47.36 | 4  | 4  | 4  | 4  | 4  | 4  | 4  | 4  | 4  | 4  | 4  | 0        | 2.50E+05 | 2.69E+05 | 3.59E+05 | 0        | 1.14E+06 | 1.00E+06 | 0        | 1.22E+05 | 0        | 0        | 2 | 2 | 2 | 4 | 1 | 2 | 0 | 0 | 1 | 2 | 0 | 0 | 0 | 0        | Mutation   |            |
| ARLY       | Argininosu P08424 ARLY_HUMAN           | 47.24 | 0  | 3  | 3  | 3  | 3  | 3  | 3  | 3  | 3  | 3  | 3  | 0        | 3.41E+05 | 0        | 0        | 0        | 8.93E+05 | 1.76E+05 | 0        | 0        | 0        | 0        | 1 | 1 | 1 | 0 | 1 | 2 | 0 | 0 | 1 | 0 | 0 | 0 | 0 | 0        | 51058      |            |
| FRW843     | Argininosu tr FRW843 FRW843_H          | 47.24 | 0  | 4  | 4  | 4  | 4  | 4  | 4  | 4  | 4  | 4  | 4  | 0        | 3.41E+05 | 0        | 0        | 0        | 8.93E+05 | 1.76E+05 | 0        | 0        | 0        | 0        | 1 | 1 | 1 | 0 | 1 | 2 | 0 | 0 | 1 | 0 | 0 | 0 | 0 | 0        | 44471      |            |
| ADA5F9ZHM8 | Argininosu tr ADA5F9ZHM8 ADA5F9ZHM8_H  | 47.24 | 0  | 4  | 4  | 4  | 4  | 4  | 4  | 4  | 4  | 4  | 4  | 0        | 3.41E+05 | 0        | 0        | 0        | 8.93E+05 | 1.76E+05 | 0        | 0        | 0        | 0        | 1 | 1 | 1 | 0 | 1 | 2 | 0 | 0 | 1 | 0 | 0 | 0 | 0 | 0        | 38707      |            |
| ADA5F9ZK6  | Argininosu tr ADA5F9ZK6 ADA5F9ZK6_H    | 47.24 | 0  | 9  | 9  | 9  | 9  | 9  | 9  | 9  | 9  | 9  | 9  | 0        | 3.41E+05 | 0        | 0        | 0        | 8.93E+05 | 1.76E+05 | 0        | 0        | 0        | 0        | 1 | 1 | 1 | 0 | 1 | 2 | 0 | 0 | 1 | 0 | 0 | 0 | 0 | 0        | 18369      |            |
| MGAT2      | Alpha-1-6-Q10469 MGAT2_HUMAN           | 47.18 | 4  | 4  | 4  | 4  | 4  | 4  | 4  | 4  | 4  | 4  | 4  | 0        | 0        | 0        | 0        | 0        | 1.07E+06 | 0        | 0        | 0        | 0        | 0        | 1 | 1 | 1 | 1 | 2 | 2 | 0 | 0 | 2 | 2 | 0 | 0 | 0 | 0        | 51550      |            |
| RI417      | 35S ribosom Q14902 RI417_HUMAN         | 47.14 | 9  | 17 | 10 | 14 | 9  | 17 | 9  | 17 | 9  | 28 | 9  | 9        | 1.30E+06 | 1.50E+06 | 7.97E+05 | 5.01E+04 | 4.87E+05 | 1.21E+06 | 1.50E+05 | 0        | 0        | 0        | 0 | 2 | 2 | 2 | 2 | 1 | 2 | 2 | 1 | 2 | 1 | 1 | 1 | 1        | 1          | Phosphoryl |
| EPN9Y2     | 35S ribosom tr EPN9Y2 EPN9Y2_HU        | 47.14 | 11 | 11 | 11 | 11 | 11 | 11 | 11 | 11 | 11 | 11 | 11 | 11       | 1.30E+06 | 1.50E+06 | 7.97E+05 | 5.01E+04 | 4.87E+05 | 1.21E+06 | 1.50E+05 | 0        | 0        | 0        | 0 | 2 | 2 | 2 | 2 | 1 | 2 | 2 | 1 | 2 | 1 | 1 | 1 | 1        | 1          | Phosphoryl |
| MK45       | Mitogen-act Q9Y4K4 MK45_HUMAN          | 46.99 | 0  | 2  | 2  | 2  | 2  | 2  | 2  | 2  | 2  | 2  | 2  | 0        | 0        | 0        | 0        | 0        | 0        | 0        | 0        | 0        | 0        | 0        | 1 | 1 | 1 | 0 | 0 | 2 | 0 | 0 | 0 | 0 | 0 | 0 | 0 | 0        | 95024      |            |
| ADA804HS2  | ADA804HS2 ADA804HS2_HUMAN              | 46.99 | 0  | 2  | 2  | 2  | 2  | 2  | 2  | 2  | 2  | 2  | 2  | 0        | 0        | 0        | 0        | 0        | 0        | 0        | 0        | 0        | 0        | 0        | 1 | 1 | 1 | 0 | 0 | 2 | 0 | 0 | 0 | 0 | 0 | 0 | 0 | 0        | 95054      |            |
| ADA2R8Y72  | Hemoglobi tr ADA2R8Y72 ADA2R8Y72_H     | 46.92 | 0  | 8  | 18 | 12 | 8  | 18 | 12 | 8  | 18 | 12 | 37 | 0        | 3.10E+05 | 2.82E+05 | 7.99E+05 | 1.08E+06 | 6.25E+06 | 0        | 2.97E+06 | 8.07E+05 | 8.21E+06 | 0        | 5 | 4 | 0 | 1 | 0 | 4 | 9 | 2 | 0 | 0 | 6 | 6 | 8 | Mutation |            |            |
| HBB        | Hemoglobi P08871 HBB_HUMAN             | 46.92 | 0  | 6  | 14 | 9  | 6  | 14 | 9  | 6  | 14 | 9  | 28 | 0        | 3.10E+05 | 2.82E+05 | 7.99E+05 | 1.08E+06 | 6.25E+06 | 0        | 2.97E+06 | 8.07E+05 | 8.21E+06 | 0        | 5 | 4 | 0 | 1 | 0 | 4 | 9 | 2 | 0 | 0 | 6 | 6 | 8 | Mutation |            |            |
| CHD1       | Chitinase 5 Q9BWS5 CHD1_HUMAN          | 46.72 | 4  | 4  | 4  | 4  | 4  | 4  | 4  | 4  | 4  | 4  | 4  | 0        | 2.41E+05 | 1.25E+06 | 1.01E+06 | 0        | 4.43E+04 | 0        | 0        | 0        | 0        | 1        | 1 | 2 | 4 | 1 | 0 | 2 | 2 | 2 | 2 | 2 | 0 | 0 | 0 | 44941    |            |            |
| ADA590UK5  | SUMO-1 ac tr ADA590UK5 ADA590UK5_H     | 46.71 | 0  | 9  | 12 | 0  | 9  | 12 | 0  | 9  | 12 | 0  | 9  | 0        | 4.43E+04 | 0        | 0        | 0        | 4.43E+04 | 0        | 0        | 0        | 0        | 0        | 3 | 3 | 3 | 0 | 0 | 1 | 0 | 0 | 1 | 2 | 0 | 0 | 0 | 0        | 25843      |            |
| B3KN4      | SUMO-1 ac tr B3KN4 B3KN4_HU            | 46.71 | 0  | 7  | 0  | 0  | 7  | 0  | 0  | 7  | 0  | 0  | 0  | 0        | 4.43E+04 | 0        | 0        | 0        | 4.43E+04 | 0        | 0        | 0        | 0        | 0        | 3 | 3 | 3 | 0 | 0 | 1 | 0 | 0 | 1 | 0 | 0 | 0 | 0 | 0        | 33384      |            |
| SAE1       | SUMO-act tr Q9UB01 SAE1_HUMAN          | 46.71 | 0  | 6  | 0  | 0  | 6  | 0  | 0  | 6  | 0  | 0  | 0  | 0        | 4.43E+04 | 0        | 0        | 0        | 4.43E+04 | 0        | 0        | 0        | 0        | 0        | 3 | 3 | 3 | 0 | 0 | 1 |   |   |   |   |   |   |   |          |            |            |



|            |                                    |       |    |    |    |   |    |    |    |    |    |   |    |          |          |          |          |          |          |          |          |          |   |   |   |   |   |   |   |   |   |   |              |            |       |   |   |   |
|------------|------------------------------------|-------|----|----|----|---|----|----|----|----|----|---|----|----------|----------|----------|----------|----------|----------|----------|----------|----------|---|---|---|---|---|---|---|---|---|---|--------------|------------|-------|---|---|---|
| CCNY       | Cyclin-Y OS Q8ND76 [CCNY_HUMAN     | 45.04 | 3  | 3  | 3  | 0 | 0  | 7  | 7  | 0  | 4  | 0 | 4  | 2,89E+05 | 2,13E+05 | 6,80E+04 | 9,92E+05 | 2,61E+06 | 4,11E+05 | 2,10E+05 | 2        | 2        | 2 | 1 | 2 | 0 | 0 | 2 | 4 | 0 | 2 | 0 | 1 Phosphoryl | 39337      |       |   |   |   |
| AD072V3Q6  | V-type prot tr [AD072V3Q6]AD072    | 45.03 | 13 | 13 | 13 | 0 | 13 | 13 | 13 | 13 | 13 | 0 | 13 | 1,49E+06 | 4,05E+06 | 2,87E+06 | 2,80E+05 | 4,20E+06 | 5,02E+06 | 2,25E+06 | 1,64E+05 | 4,21E+05 | 3 | 3 | 2 | 4 | 3 | 0 | 2 | 2 | 4 | 2 | 0            | 3 Mutation | 9708  |   |   |   |
| AD072V4K4  | V-type prot tr [AD072V4K4]AD072    | 45.03 | 15 | 15 | 15 | 0 | 15 | 15 | 15 | 15 | 15 | 0 | 15 | 1,49E+06 | 4,05E+06 | 2,87E+06 | 2,80E+05 | 4,20E+06 | 5,02E+06 | 2,25E+06 | 1,64E+05 | 4,21E+05 | 3 | 3 | 2 | 4 | 3 | 0 | 2 | 2 | 4 | 2 | 0            | 3 Mutation | 8287  |   |   |   |
| AD072V3V5  | V-type prot tr [AD072V3V5]AD072    | 45.03 | 11 | 11 | 11 | 0 | 11 | 11 | 11 | 11 | 11 | 0 | 11 | 1,49E+06 | 4,05E+06 | 2,87E+06 | 2,80E+05 | 4,20E+06 | 5,02E+06 | 2,25E+06 | 1,64E+05 | 4,21E+05 | 3 | 3 | 2 | 4 | 3 | 0 | 2 | 2 | 4 | 2 | 0            | 3 Mutation | 14004 |   |   |   |
| VATG1      | V-type prot tr [VATG1]VATG1_H      | 45.03 | 9  | 9  | 9  | 0 | 9  | 9  | 9  | 9  | 9  | 0 | 9  | 1,49E+06 | 4,05E+06 | 2,87E+06 | 2,80E+05 | 4,20E+06 | 5,02E+06 | 2,25E+06 | 1,64E+05 | 4,21E+05 | 3 | 3 | 2 | 4 | 3 | 0 | 2 | 2 | 4 | 2 | 0            | 3 Mutation | 13758 |   |   |   |
| FPFS       | Farnesyl py P14324 [FPFS_HUMAN     | 44.92 | 4  | 4  | 4  | 0 | 4  | 4  | 4  | 4  | 4  | 0 | 4  | 1,68E+06 | 8,51E+06 | 4,00E+06 | 4,51E+06 | 7,71E+06 | 5,09E+06 | 1,36E+05 | 1,75E+06 | 2        | 2 | 1 | 2 | 1 | 0 | 2 | 1 | 3 | 0 | 1 | 1 Mutation   | 48276      |       |   |   |   |
| AD087WVNA  | Farnesyl py tr [AD087WVNA]AD087    | 44.92 | 7  | 7  | 7  | 0 | 7  | 7  | 7  | 7  | 7  | 0 | 7  | 1,68E+06 | 8,51E+06 | 4,00E+06 | 4,51E+06 | 7,71E+06 | 5,09E+06 | 1,36E+05 | 1,75E+06 | 2        | 2 | 1 | 2 | 1 | 0 | 2 | 1 | 3 | 0 | 1 | 1 Mutation   | 31774      |       |   |   |   |
| AD087X1D8  | Farnesyl py tr [AD087X1D8]AD087    | 44.92 | 10 | 10 | 10 | 0 | 10 | 10 | 10 | 10 | 10 | 0 | 10 | 1,68E+06 | 8,51E+06 | 4,00E+06 | 4,51E+06 | 7,71E+06 | 5,09E+06 | 1,36E+05 | 1,75E+06 | 2        | 2 | 1 | 2 | 1 | 0 | 2 | 1 | 3 | 0 | 1 | 1 Mutation   | 20033      |       |   |   |   |
| AP2S1      | AP-2 comp [AP2S1]AP2S1_HUMAN       | 44.88 | 8  | 8  | 8  | 0 | 8  | 8  | 8  | 8  | 8  | 0 | 8  | 1,12E+06 | 1,44E+06 | 4,33E+05 | 0        | 2,60E+06 | 6,65E+05 | 0        | 0        | 0        | 3 | 3 | 1 | 6 | 1 | 0 | 0 | 0 | 0 | 0 | 0            | 0          | 0     | 0 |   |   |
| MOR0N4     | AP comple tr [MOR0N4]MOR0N4_H      | 44.88 | 8  | 8  | 8  | 0 | 8  | 8  | 8  | 8  | 8  | 0 | 8  | 1,12E+06 | 1,44E+06 | 4,33E+05 | 0        | 2,60E+06 | 6,65E+05 | 0        | 0        | 0        | 3 | 3 | 1 | 1 | 1 | 1 | 0 | 0 | 0 | 0 | 0            | 0          | 0     | 0 |   |   |
| MOQY22     | AP comple tr [MOQY22]MOQY22_H      | 44.88 | 8  | 8  | 8  | 0 | 8  | 8  | 8  | 8  | 8  | 0 | 8  | 1,12E+06 | 1,44E+06 | 4,33E+05 | 0        | 2,60E+06 | 6,65E+05 | 0        | 0        | 0        | 3 | 3 | 1 | 1 | 1 | 1 | 0 | 0 | 0 | 0 | 0            | 0          | 0     | 0 |   |   |
| MOQZ21     | AP comple tr [MOQZ21]MOQZ21_H      | 44.88 | 10 | 10 | 10 | 0 | 10 | 10 | 10 | 10 | 10 | 0 | 10 | 1,12E+06 | 1,44E+06 | 4,33E+05 | 0        | 2,60E+06 | 6,65E+05 | 0        | 0        | 0        | 3 | 3 | 1 | 1 | 1 | 1 | 0 | 0 | 0 | 0 | 0            | 0          | 0     | 0 |   |   |
| XGR390     | AP comple tr [XGR390]XGR390_H      | 44.88 | 8  | 8  | 8  | 0 | 8  | 8  | 8  | 8  | 8  | 0 | 8  | 1,12E+06 | 1,44E+06 | 4,33E+05 | 0        | 2,60E+06 | 6,65E+05 | 0        | 0        | 0        | 3 | 3 | 1 | 1 | 1 | 1 | 0 | 0 | 0 | 0 | 0            | 0          | 0     | 0 |   |   |
| GATA6      | Transcript Q92908 [GATA6_HUMAN     | 44.84 | 0  | 2  | 2  | 0 | 0  | 2  | 2  | 2  | 2  | 0 | 0  | 0        | 4,69E+05 | 1,03E+06 | 0        | 7,41E+05 | 1,75E+05 | 0        | 0        | 0        | 2 | 2 | 1 | 1 | 1 | 0 | 0 | 0 | 0 | 0 | 0            | 0          | 0     | 0 |   |   |
| CERS2      | Ceramide s [CERS2]CERS2_HUMAN      | 44.68 | 4  | 0  | 0  | 0 | 5  | 4  | 4  | 4  | 4  | 0 | 0  | 7,98E+05 | 0        | 0        | 0        | 6,98E+05 | 0        | 0        | 0        | 0        | 2 | 2 | 2 | 0 | 0 | 0 | 1 | 1 | 1 | 0 | 0            | 0          | 0     | 0 | 0 |   |
| QSS2E4     | Ceramide s tr [QSS2E4]QSS2E4_HU    | 44.68 | 6  | 0  | 0  | 0 | 8  | 6  | 6  | 6  | 6  | 0 | 0  | 7,98E+05 | 0        | 0        | 0        | 6,98E+05 | 0        | 0        | 0        | 0        | 2 | 2 | 2 | 0 | 0 | 0 | 1 | 1 | 1 | 0 | 0            | 0          | 0     | 0 | 0 |   |
| QSS2E3     | Ceramide s tr [QSS2E3]QSS2E3_HU    | 44.68 | 8  | 0  | 0  | 0 | 10 | 8  | 8  | 8  | 8  | 0 | 0  | 7,98E+05 | 0        | 0        | 0        | 6,98E+05 | 0        | 0        | 0        | 0        | 2 | 2 | 2 | 0 | 0 | 0 | 1 | 1 | 1 | 0 | 0            | 0          | 0     | 0 | 0 |   |
| HOYH6      | Ceramide s tr [HOYH6]HOYH6_HU      | 44.68 | 7  | 0  | 0  | 0 | 9  | 7  | 7  | 7  | 7  | 0 | 0  | 7,98E+05 | 0        | 0        | 0        | 6,98E+05 | 0        | 0        | 0        | 0        | 2 | 2 | 2 | 0 | 0 | 0 | 1 | 1 | 1 | 0 | 0            | 0          | 0     | 0 | 0 |   |
| QSS2E1     | Ceramide s tr [QSS2E1]QSS2E1_HU    | 44.68 | 5  | 0  | 0  | 0 | 7  | 5  | 5  | 5  | 5  | 0 | 0  | 7,98E+05 | 0        | 0        | 0        | 6,98E+05 | 0        | 0        | 0        | 0        | 2 | 2 | 2 | 0 | 0 | 0 | 1 | 1 | 1 | 0 | 0            | 0          | 0     | 0 | 0 |   |
| HOYNU7     | Ceramide s tr [HOYNU7]HOYNU7_H     | 44.68 | 4  | 0  | 0  | 0 | 4  | 4  | 4  | 4  | 4  | 0 | 0  | 7,98E+05 | 0        | 0        | 0        | 6,98E+05 | 0        | 0        | 0        | 0        | 1 | 1 | 2 | 0 | 0 | 0 | 0 | 1 | 1 | 0 | 0            | 0          | 0     | 0 | 0 |   |
| QSS2E2     | Ceramide s tr [QSS2E2]QSS2E2_HU    | 44.68 | 12 | 0  | 0  | 0 | 16 | 12 | 12 | 12 | 12 | 0 | 0  | 7,98E+05 | 0        | 0        | 0        | 6,98E+05 | 0        | 0        | 0        | 0        | 1 | 1 | 2 | 2 | 0 | 0 | 0 | 1 | 1 | 1 | 0            | 0          | 0     | 0 | 0 | 0 |
| C93E7      | 39S ribosom tr [C93E7]C93E7_HU     | 44.48 | 4  | 4  | 4  | 0 | 4  | 4  | 4  | 4  | 4  | 0 | 0  | 4        | 1,05E+05 | 3,79E+05 | 1,11E+05 | 0        | 1,99E+05 | 4,23E+05 | 0        | 4,89E+04 | 1 | 1 | 2 | 2 | 3 | 0 | 1 | 1 | 2 | 0 | 0            | 0          | 0     | 0 | 0 |   |
| RN59       | 39S ribosom OS Q9KX5 [RN59_HUMAN   | 44.48 | 4  | 4  | 4  | 0 | 4  | 4  | 4  | 4  | 4  | 0 | 0  | 4        | 1,05E+05 | 3,79E+05 | 1,11E+05 | 0        | 1,99E+05 | 4,23E+05 | 0        | 4,89E+04 | 1 | 1 | 2 | 2 | 3 | 0 | 1 | 1 | 2 | 0 | 0            | 0          | 0     | 0 | 0 |   |
| ARK72      | Aflatoxin B 043488 [ARK72_HUMAN    | 44.42 | 3  | 3  | 3  | 0 | 3  | 3  | 3  | 3  | 3  | 0 | 0  | 1,74E+06 | 0        | 0        | 0        | 1,86E+05 | 6,13E+05 | 0        | 0        | 0        | 2 | 2 | 2 | 2 | 2 | 0 | 0 | 2 | 0 | 5 | 1            | 1          | 2     | 0 | 0 |   |
| QSTH11     | Heme-bind tr [QSTH11]QSTH11_H      | 44.3  | 0  | 13 | 13 | 0 | 0  | 13 | 13 | 13 | 13 | 0 | 0  | 0        | 2,73E+05 | 3,23E+05 | 0        | 1,52E+05 | 0        | 1,51E+05 | 0        | 1        | 1 | 0 | 2 | 1 | 0 | 0 | 0 | 1 | 1 | 1 | 1            | 0          | 0     | 0 | 0 |   |
| HEBP2      | Heme-bind OS Q9524 [HEBP2_HUMAN    | 44.3  | 0  | 7  | 7  | 0 | 0  | 7  | 7  | 7  | 7  | 0 | 0  | 0        | 2,73E+05 | 3,23E+05 | 0        | 1,52E+05 | 0        | 1,51E+05 | 0        | 1        | 1 | 0 | 2 | 1 | 0 | 0 | 0 | 1 | 1 | 1 | 1            | 0          | 0     | 0 | 0 |   |
| BM023      | U4/U6.US tr [BM023]BM023_HU        | 44.26 | 6  | 4  | 4  | 0 | 6  | 4  | 4  | 4  | 4  | 0 | 0  | 4,63E+05 | 0        | 0        | 0        | 0        | 0        | 0        | 0        | 0        | 2 | 2 | 2 | 0 | 0 | 0 | 0 | 1 | 2 | 2 | 0            | 0          | 0     | 0 | 0 |   |
| SNJ22      | U4/U6.US OS Q5369 [SNJ22_HUMAN     | 44.26 | 0  | 4  | 4  | 0 | 0  | 4  | 4  | 4  | 4  | 0 | 0  | 0        | 4,63E+05 | 0        | 0        | 0        | 0        | 0        | 0        | 0        | 2 | 2 | 0 | 0 | 0 | 0 | 0 | 1 | 2 | 2 | 0            | 0          | 0     | 0 | 0 |   |
| AD0487X1B2 | U4/U6.US tr [AD0487X1B2]AD0487     | 44.26 | 0  | 5  | 5  | 0 | 0  | 5  | 5  | 5  | 5  | 0 | 0  | 0        | 4,63E+05 | 0        | 0        | 0        | 0        | 0        | 0        | 0        | 2 | 2 | 0 | 0 | 0 | 0 | 0 | 1 | 2 | 2 | 0            | 0          | 0     | 0 | 0 |   |
| F23A4      | Protein FAI tr [F23A4]F23A4_HUMAN  | 44.13 | 0  | 0  | 0  | 0 | 0  | 0  | 0  | 0  | 0  | 0 | 0  | 0        | 0        | 0        | 0        | 1,39E+05 | 0        | 0        | 0        | 1        | 1 | 0 | 0 | 0 | 0 | 0 | 0 | 0 | 0 | 0 | 0            | 0          | 0     | 0 | 0 |   |
| UF7C08     | Protein FAI tr [UF7C08]UF7C08_HU   | 44.13 | 0  | 0  | 0  | 0 | 0  | 0  | 0  | 0  | 0  | 0 | 0  | 0        | 0        | 0        | 0        | 1,39E+05 | 0        | 0        | 0        | 1        | 1 | 0 | 0 | 0 | 0 | 0 | 0 | 0 | 0 | 0 | 0            | 0          | 0     | 0 | 0 |   |
| SIRG21     | Endophilin tr [SIRG21]SIRG21_HUMAN | 44.12 | 8  | 11 | 2  | 0 | 8  | 11 | 2  | 8  | 11 | 2 | 0  | 0        | 1,07E+06 | 2,14E+06 | 3,26E+06 | 3,79E+06 | 2,15E+06 | 1,54E+06 | 0        | 0        | 3 | 3 | 2 | 3 | 2 | 0 | 0 | 3 | 1 | 2 | 0            | 0          | 0     | 0 | 0 |   |
| MOR03      | Endophilin tr [MOR03]MOR03_HU      | 44.12 | 20 | 6  | 6  | 0 | 20 | 6  | 20 | 6  | 20 | 0 | 0  | 1,07E+06 | 2,14E+06 | 3,26E+06 | 3,79E+06 | 2,15E+06 | 1,54E+06 | 0        | 0        | 0        | 3 | 3 | 2 | 3 | 2 | 0 | 0 | 3 | 1 | 2 | 0            | 0          | 0     | 0 | 0 |   |
| MOQYEO     | Endophilin tr [MOQYEO]MOQYEO_H     | 44.12 | 22 | 31 | 6  | 0 | 22 | 31 | 6  | 22 | 31 | 0 | 0  | 1,07E+06 | 2,14E+06 | 3,26E+06 | 3,79E+06 | 2,15E+06 | 1,54E+06 | 0        | 0        | 0        | 3 | 3 | 2 | 3 | 2 | 0 | 0 | 3 | 1 | 2 | 0            | 0          | 0     | 0 | 0 |   |
| MARH5      | E3 ubiqutin OS Q9N447 [MARH5_HUMAN | 44    | 0  | 0  | 6  | 0 | 6  | 0  | 6  | 0  | 6  | 0 | 0  | 6        | 1,77E+05 | 0        | 0        | 1,24E+05 | 0        | 0        | 0        | 3,00E+05 | 1 | 1 | 0 | 0 | 0 | 0 | 0 | 1 | 1 | 0 | 0            | 0          | 0     | 0 | 0 | 0 |
| UTP1E      | U3 small m OS Q9511 [UTP1E_HUMAN   | 43.93 | 3  | 3  | 0  | 0 | 0  | 3  | 3  | 3  | 3  | 0 | 0  | 3,78E+04 | 1,90E+04 | 0        | 0        | 1,48E+04 | 0        | 0        | 0        | 1        | 1 | 1 | 1 | 0 | 0 | 0 | 0 | 1 | 1 | 0 | 0            | 0          | 0     | 0 | 0 |   |
| AD0404CGG1 | Protein kin tr [AD0404CGG1]AD0404  | 43.84 | 4  | 4  | 4  | 0 | 4  | 4  | 4  | 4  | 4  | 0 | 0  | 0        | 6,54E+04 | 0        | 0        | 1,45E+05 | 1,31E+05 | 0        | 0        | 0        | 1 | 1 | 0 | 0 | 0 | 0 | 0 | 0 | 1 | 1 | 0            | 0          | 0     | 0 | 0 |   |
| T184C      | Transmem OS Q9NV41 [T184C_HUMAN    | 43.84 | 3  | 3  | 3  | 0 | 3  | 3  | 3  | 3  | 3  | 0 | 0  | 3        | 0        | 0        | 0        | 1,83E+05 | 0        | 0        | 0        | 0        | 1 | 1 | 1 | 1 | 2 | 0 | 0 | 2 | 1 | 2 | 2            | 0          | 0     |   |   |   |

|            |                                         |       |    |    |    |   |    |    |    |    |    |   |    |          |          |          |          |          |          |          |          |          |   |   |   |   |   |   |   |   |   |   |   |   |          |          |             |             |        |
|------------|-----------------------------------------|-------|----|----|----|---|----|----|----|----|----|---|----|----------|----------|----------|----------|----------|----------|----------|----------|----------|---|---|---|---|---|---|---|---|---|---|---|---|----------|----------|-------------|-------------|--------|
| STMN1      | Stathmin G P16949 STMN1_HUMA            | 41.57 | 15 | 15 | 15 | 0 | 0  | 15 | 15 | 15 | 6  | 0 | 6  | 2.93E+06 | 9.25E+06 | 6.16E+06 | 7.02E+06 | 9.82E+06 | 5.24E+06 | 9.90E+05 | 1.12E+06 | 3        | 3 | 4 | 6 | 4 | 0 | 0 | 4 | 4 | 5 | 1 | 0 | 1 | Mutation | 17302    |             |             |        |
| AZ2AD0     | Stathmin I tr AZ2AD0 AZ2AD0_HL          | 41.57 | 26 | 26 | 26 | 0 | 0  | 26 | 26 | 26 | 11 | 0 | 11 | 2.93E+06 | 9.25E+06 | 6.16E+06 | 7.02E+06 | 9.82E+06 | 5.24E+06 | 9.90E+05 | 1.12E+06 | 3        | 3 | 4 | 6 | 4 | 0 | 0 | 4 | 4 | 5 | 1 | 0 | 1 | Mutation | 9793     |             |             |        |
| Q5XJ08     | Four and a tr Q5XJ08 Q5XJ08_HUM         | 41.53 | 8  | 8  | 8  | 0 | 0  | 8  | 8  | 8  | 0  | 0 | 8  | 8.95E+05 | 3.95E+06 | 3.34E+06 | 3.71E+06 | 3.44E+06 | 7.95E+05 | 1.94E+05 | 1        | 1        | 2 | 2 | 2 | 4 | 0 | 0 | 4 | 4 | 2 | 0 | 0 | 2 | 29161    |          |             |             |        |
| FIL1L      | Four and a tr Q5XJ08 Q5XJ08_HUM         | 41.53 | 4  | 7  | 4  | 0 | 0  | 4  | 7  | 4  | 0  | 0 | 4  | 8.95E+05 | 3.95E+06 | 3.34E+06 | 3.71E+06 | 3.44E+06 | 7.95E+05 | 1.94E+05 | 2        | 2        | 2 | 2 | 2 | 4 | 0 | 0 | 4 | 4 | 2 | 0 | 0 | 2 | 26263    |          |             |             |        |
| Q5XJ02     | Four and a tr Q5XJ02 Q5XJ02_HUM         | 41.53 | 6  | 6  | 6  | 0 | 0  | 6  | 6  | 6  | 0  | 0 | 6  | 8.95E+05 | 3.95E+06 | 3.34E+06 | 3.71E+06 | 3.44E+06 | 7.95E+05 | 1.94E+05 | 1        | 1        | 2 | 2 | 2 | 4 | 0 | 0 | 4 | 4 | 3 | 1 | 0 | 0 | 2        | 23701    |             |             |        |
| ADA0095G82 | Four and a tr ADA0095G82 ADA0095G82_HUM | 41.53 | 9  | 9  | 9  | 0 | 0  | 9  | 9  | 9  | 0  | 0 | 9  | 8.95E+05 | 3.95E+06 | 3.34E+06 | 3.71E+06 | 3.44E+06 | 7.95E+05 | 1.94E+05 | 1        | 1        | 2 | 2 | 2 | 4 | 0 | 0 | 4 | 4 | 3 | 1 | 0 | 0 | 2        | 15859    |             |             |        |
| Q5XJ00     | Four and a tr Q5XJ00 Q5XJ00_HUM         | 41.53 | 9  | 9  | 9  | 0 | 0  | 9  | 9  | 9  | 0  | 0 | 9  | 8.95E+05 | 3.95E+06 | 3.34E+06 | 3.71E+06 | 3.44E+06 | 7.95E+05 | 1.94E+05 | 1        | 1        | 2 | 2 | 2 | 4 | 0 | 0 | 4 | 4 | 3 | 1 | 0 | 0 | 2        | 16151    |             |             |        |
| ADA0095P6  | Four and a tr ADA0095P6 ADA0095P6_HUM   | 41.53 | 8  | 8  | 8  | 0 | 0  | 8  | 8  | 8  | 0  | 0 | 8  | 8.95E+05 | 3.95E+06 | 3.34E+06 | 3.71E+06 | 3.44E+06 | 7.95E+05 | 1.94E+05 | 1        | 1        | 2 | 2 | 2 | 4 | 0 | 0 | 4 | 4 | 3 | 1 | 0 | 0 | 2        | 16824    |             |             |        |
| ADA0095P0  | Four and a tr ADA0095P0 ADA0095P0_HUM   | 41.53 | 8  | 8  | 8  | 0 | 0  | 8  | 8  | 8  | 0  | 0 | 8  | 8.95E+05 | 3.95E+06 | 3.34E+06 | 3.71E+06 | 3.44E+06 | 7.95E+05 | 1.94E+05 | 1        | 1        | 2 | 2 | 2 | 4 | 0 | 0 | 4 | 4 | 3 | 1 | 0 | 0 | 2        | 17438    |             |             |        |
| Q5XJ09     | Four and a tr Q5XJ09 Q5XJ09_HU          | 41.53 | 7  | 7  | 7  | 0 | 0  | 7  | 7  | 7  | 0  | 0 | 7  | 8.95E+05 | 3.95E+06 | 3.34E+06 | 3.71E+06 | 3.44E+06 | 7.95E+05 | 1.94E+05 | 1        | 1        | 2 | 2 | 2 | 4 | 0 | 0 | 4 | 4 | 3 | 1 | 0 | 0 | 2        | 17807    |             |             |        |
| ADA0095F29 | Four and a tr ADA0095F29 ADA0095F29_HUM | 41.53 | 7  | 7  | 7  | 0 | 0  | 7  | 7  | 7  | 0  | 0 | 7  | 8.95E+05 | 3.95E+06 | 3.34E+06 | 3.71E+06 | 3.44E+06 | 7.95E+05 | 1.94E+05 | 1        | 1        | 2 | 2 | 2 | 4 | 0 | 0 | 4 | 4 | 3 | 1 | 0 | 0 | 2        | 19897    |             |             |        |
| Q5XJ08     | Four and a tr Q5XJ08 Q5XJ08_HU          | 41.53 | 6  | 6  | 6  | 0 | 0  | 6  | 6  | 6  | 0  | 0 | 6  | 8.95E+05 | 3.95E+06 | 3.34E+06 | 3.71E+06 | 3.44E+06 | 7.95E+05 | 1.94E+05 | 1        | 1        | 2 | 2 | 2 | 4 | 0 | 0 | 4 | 4 | 3 | 1 | 0 | 0 | 2        | 23211    |             |             |        |
| Q5XJ07     | Four and a tr Q5XJ07 Q5XJ07_HU          | 41.53 | 6  | 6  | 6  | 0 | 0  | 6  | 6  | 6  | 0  | 0 | 6  | 8.95E+05 | 3.95E+06 | 3.34E+06 | 3.71E+06 | 3.44E+06 | 7.95E+05 | 1.94E+05 | 1        | 1        | 2 | 2 | 2 | 4 | 0 | 0 | 4 | 4 | 3 | 1 | 0 | 0 | 2        | 23326    |             |             |        |
| Q5XJ03     | Four and a tr Q5XJ03 Q5XJ03_HU          | 41.53 | 6  | 6  | 6  | 0 | 0  | 6  | 6  | 6  | 0  | 0 | 6  | 8.95E+05 | 3.95E+06 | 3.34E+06 | 3.71E+06 | 3.44E+06 | 7.95E+05 | 1.94E+05 | 1        | 1        | 2 | 2 | 2 | 4 | 0 | 0 | 4 | 4 | 3 | 1 | 0 | 0 | 2        | 23617    |             |             |        |
| ADA494C006 | Four and a tr ADA494C006 ADA4949_HUM    | 41.53 | 5  | 5  | 5  | 0 | 0  | 5  | 5  | 5  | 0  | 0 | 5  | 8.95E+05 | 3.95E+06 | 3.34E+06 | 3.71E+06 | 3.44E+06 | 7.95E+05 | 1.94E+05 | 1        | 1        | 2 | 2 | 2 | 4 | 0 | 0 | 4 | 4 | 3 | 1 | 0 | 0 | 2        | 29194    |             |             |        |
| AP0L2      | Apolipoprotein Q98Q51 AP0L2_HUMA        | 41.52 | 7  | 9  | 7  | 3 | 7  | 7  | 7  | 7  | 0  | 3 | 7  | 2.07E+06 | 2.45E+06 | 2.90E+06 | 2.02E+05 | 1.11E+06 | 4.91E+06 | 2.03E+05 | 4.26E+05 | 4        | 4 | 3 | 3 | 3 | 1 | 3 | 4 | 4 | 0 | 1 | 0 | 2 | Mutation | 37092    |             |             |        |
| J3KQJ8     | Apolipoprotein tr J3KQJ8 J3KQJ8_HU      | 41.52 | 5  | 7  | 5  | 2 | 5  | 5  | 5  | 5  | 0  | 2 | 5  | 2.07E+06 | 2.45E+06 | 2.90E+06 | 2.02E+05 | 1.11E+06 | 4.91E+06 | 2.03E+05 | 4.26E+05 | 4        | 4 | 3 | 3 | 3 | 1 | 3 | 4 | 4 | 0 | 1 | 0 | 2 | Mutation | 48915    |             |             |        |
| ESP905     | Apolipoprotein tr ESP905 ESP905_HU      | 41.52 | 9  | 15 | 9  | 9 | 9  | 9  | 9  | 9  | 0  | 9 | 9  | 1.22E+06 | 1.08E+06 | 2.02E+05 | 5.64E+05 | 2.32E+06 | 8.81E+05 | 2.03E+05 | 1.38E+05 | 3        | 3 | 2 | 2 | 1 | 1 | 2 | 2 | 2 | 2 | 0 | 1 | 0 | 2        | Mutation | 14948       |             |        |
| F5G0Y5     | Oligoribon tr F5G0Y5 F5G0Y5_HU          | 41.48 | 8  | 8  | 8  | 5 | 8  | 8  | 8  | 8  | 0  | 5 | 8  | 5.48E+06 | 6.37E+06 | 6.36E+06 | 2.12E+05 | 8.64E+05 | 7.46E+06 | 8.04E+06 | 3.08E+06 | 2.09E+06 | 2 | 2 | 2 | 4 | 3 | 4 | 5 | 2 | 2 | 2 | 2 | 2 | 4        | 25275    |             |             |        |
| ORN        | Oligoribon Q9Y3B8 ORN_HUMAN             | 41.48 | 8  | 8  | 8  | 4 | 8  | 8  | 8  | 8  | 4  | 4 | 8  | 4.48E+06 | 6.37E+06 | 6.36E+06 | 2.12E+05 | 8.64E+05 | 7.46E+06 | 8.04E+06 | 3.08E+06 | 2.09E+06 | 2 | 2 | 2 | 4 | 3 | 4 | 1 | 2 | 3 | 5 | 2 | 2 | 2        | 4        | 26833       |             |        |
| HOY654     | Oligoribon tr HOY654 HOY654_HU          | 41.48 | 10 | 10 | 10 | 5 | 10 | 10 | 10 | 10 | 0  | 5 | 10 | 5.48E+06 | 6.37E+06 | 6.36E+06 | 2.12E+05 | 8.64E+05 | 7.46E+06 | 8.04E+06 | 3.08E+06 | 2.09E+06 | 2 | 2 | 2 | 4 | 3 | 4 | 1 | 2 | 3 | 5 | 2 | 2 | 2        | 4        | 21848       |             |        |
| HOYGR4     | Oligoribon tr HOYGR4 HOYGR4_HL          | 41.48 | 9  | 9  | 9  | 5 | 9  | 9  | 9  | 9  | 5  | 5 | 9  | 5.48E+06 | 6.37E+06 | 6.36E+06 | 2.12E+05 | 8.64E+05 | 7.46E+06 | 8.04E+06 | 3.08E+06 | 2.09E+06 | 2 | 2 | 2 | 4 | 3 | 4 | 1 | 2 | 3 | 5 | 2 | 2 | 2        | 4        | 22125       |             |        |
| ADA440T820 | Protein dia tr ADA440T820 ADA440T820_HU | 41.3  | 1  | 1  | 1  | 0 | 0  | 1  | 2  | 1  | 0  | 0 | 2  | 0        | 0        | 4.33E+05 | 0        | 4.33E+05 | 0        | 0        | 0        | 0        | 3 | 3 | 1 | 2 | 1 | 2 | 2 | 2 | 2 | 2 | 2 | 2 | 2        | 2        | 4           | 140300      |        |
| DIAP1      | Protein dia 060610 DIAP1_HUMAN          | 41.3  | 1  | 1  | 1  | 0 | 0  | 1  | 2  | 1  | 0  | 0 | 2  | 0        | 0        | 4.33E+05 | 0        | 4.33E+05 | 0        | 0        | 0        | 0        | 3 | 3 | 1 | 2 | 2 | 2 | 2 | 2 | 2 | 2 | 2 | 2 | 2        | 2        | 4           | 141347      |        |
| ADA02GJH68 | Protein dia tr ADA02GJH68 ADA02GJH68_HU | 41.3  | 1  | 1  | 1  | 0 | 0  | 1  | 2  | 1  | 0  | 0 | 2  | 0        | 0        | 4.33E+05 | 0        | 4.33E+05 | 0        | 0        | 0        | 0        | 3 | 3 | 1 | 2 | 2 | 2 | 2 | 2 | 2 | 2 | 2 | 2 | 2        | 2        | 4           | 141358      |        |
| ADA028Y8N1 | Protein dia tr ADA028Y8N1 ADA028Y8N1_HU | 41.3  | 1  | 1  | 1  | 0 | 0  | 1  | 2  | 1  | 0  | 0 | 2  | 0        | 0        | 4.33E+05 | 0        | 4.33E+05 | 0        | 0        | 0        | 0        | 3 | 3 | 1 | 2 | 2 | 2 | 2 | 2 | 2 | 2 | 2 | 2 | 2        | 2        | 4           | 139413      |        |
| BAZ27      | Protein dia tr BAZ27 BAZ27_HUM          | 41.3  | 7  | 7  | 7  | 0 | 0  | 7  | 7  | 7  | 0  | 0 | 7  | 0        | 0        | 4.33E+05 | 0        | 4.33E+05 | 0        | 0        | 0        | 0        | 3 | 3 | 1 | 2 | 2 | 2 | 2 | 2 | 2 | 2 | 2 | 2 | 2        | 2        | 4           | 25508       |        |
| MINP1      | Multipe in Q9UNW1 MINP1_HUM             | 41.28 | 0  | 0  | 0  | 0 | 0  | 0  | 0  | 0  | 0  | 0 | 0  | 0        | 0        | 4.33E+05 | 0        | 4.33E+05 | 0        | 0        | 0        | 0        | 2 | 2 | 2 | 2 | 2 | 2 | 2 | 2 | 2 | 2 | 2 | 2 | 2        | 2        | 4           | 55051       |        |
| ADA6Q8PGB0 | DNA-direct tr ADA6Q8PGB0 ADA6Q8PGB0_HU  | 41.22 | 1  | 1  | 1  | 0 | 0  | 1  | 2  | 1  | 0  | 0 | 1  | 1.24E+05 | 3.86E+05 | 0        | 6.74E+05 | 0        | 0        | 0        | 0        | 0        | 0 | 4 | 4 | 0 | 2 | 4 | 0 | 2 | 4 | 1 | 0 | 1 | 0        | 1        | Beta-methyl | 217244      |        |
| RPB1       | DNA-direct P24928 RPB1_HUMAN            | 41.22 | 0  | 1  | 1  | 0 | 0  | 1  | 1  | 0  | 0  | 0 | 1  | 1.24E+05 | 3.86E+05 | 0        | 6.74E+05 | 0        | 0        | 0        | 0        | 0        | 0 | 4 | 4 | 0 | 2 | 4 | 0 | 2 | 4 | 0 | 1 | 0 | 1        | 0        | 1           | Beta-methyl | 217174 |
| PSP1       | PC4 and SF 075475 PSP1_HUMAN            | 41.05 | 8  | 5  | 7  | 0 | 0  | 6  | 5  | 4  | 0  | 2 | 6  | 2.49E+06 | 1.47E+06 | 5.06E+06 | 3.48E+06 | 3.54E+06 | 2.51E+06 | 2.28E+06 | 7        | 6        | 4 | 2 | 4 | 4 | 0 | 5 | 4 | 4 | 4 | 0 | 1 | 0 | 1        | 0        | Phosphory   | 60103       |        |
| VASN       | Vasotin OS Q66M4 VASN_HUMAN             | 40.92 | 2  | 2  | 2  | 0 | 2  | 2  | 2  | 2  | 0  | 0 | 2  | 5.35E+05 | 1.76E+06 | 0        | 9.48E+05 | 2.16E+06 | 1.32E+06 | 0        | 0        | 2        | 2 | 2 | 2 | 2 | 2 | 2 | 2 | 2 | 2 | 2 | 2 | 2 | 2        | 2        | 4           | 71713       |        |
| PVR        | Polviovirus P15151 PVR_HUMAN            | 40.81 | 3  | 3  | 3  | 0 | 0  | 3  | 3  | 3  | 0  | 0 | 3  | 3.67E+05 | 5.87E+05 | 3.82E+05 | 9.00E+05 | 1.36E+05 | 0        | 0        | 0        | 1        | 1 | 1 | 1 | 1 | 1 | 1 | 1 | 1 | 1 | 1 | 1 | 1 | 1        | 1        | 0           | 45303       |        |
| ADA0A0MSA9 | Poliovirus tr ADA0A0MSA9 ADA0A0MSA9_HU  | 40.81 | 3  | 3  | 3  | 0 | 0  | 3  | 3  | 3  | 0  | 0 | 3  | 3.67E+05 | 5.87E+05 | 3.82E+05 | 9.00E+05 | 1.36E+05 | 0        | 0        | 0        | 1        | 1 | 1 | 1 | 1 | 1 | 1 | 1 | 1 | 1 | 1 | 1 | 1 | 1        | 1        | 0           | 42882       |        |
| ADA0C4D649 | Poliovirus tr ADA0C4D649 ADA0C4D649_HU  | 40.81 | 3  | 3  | 3  | 0 | 0  | 3  | 3  | 3  | 0  | 0 | 3  | 3.67E+05 | 5.87E+05 | 3.82E+05 | 9.00E+05 | 1.36E+05 | 0        | 0        | 0        | 1        | 1 | 1 | 1 | 1 | 1 | 1 | 1 | 1 | 1 | 1 | 1 | 1 | 1        | 1        | 0           | 45321       |        |
| NF31       | Cysteine di Q9Y697 NF31_HUMAN           | 40.8  | 0  | 6  | 6  | 0 | 3  | 3  | 6  | 3  | 3  | 0 | 3  | 1.03E+06 | 2.30E+06 | 0        | 5.71E+05 | 1.78E+06 | 1.41E+06 | 5.28E+05 | 3.61E+05 | 1.50E+06 | 2 | 2 | 2 |   |   |   |   |   |   |   |   |   |          |          |             |             |        |



|             |                                    |       |    |    |    |   |    |    |    |   |          |          |          |          |          |          |          |          |          |          |          |          |   |   |   |   |   |          |    |    |   |   |           |          |          |        |
|-------------|------------------------------------|-------|----|----|----|---|----|----|----|---|----------|----------|----------|----------|----------|----------|----------|----------|----------|----------|----------|----------|---|---|---|---|---|----------|----|----|---|---|-----------|----------|----------|--------|
| TLXNA       | Alpha-taxil P40222 TLXNA_HUMAN     | 38.04 | 4  | 10 | 6  | 0 | 0  | 8  | 4  | 7 | 0        | 0        | 0        | 3,91E+05 | 1,51E+06 | 1,47E+06 | 8,56E+05 | 4,81E+05 | 5,08E+05 | 7        | 7        | 2        | 6 | 5 | 0 | 0 | 4 | 3        | 4  | 0  | 0 | 0 | Beta-meth | 61891    |          |        |
| ITPA        | Inosine triphosphatase ITPA_HUMAN  | 37.99 | 0  | 8  | 8  | 0 | 0  | 8  | 17 | 9 | 0        | 0        | 0        | 8,31E+05 | 1,60E+06 | 8,05E+05 | 1,72E+06 | 0        | 0        | 2        | 2        | 2        | 0 | 2 | 4 | 0 | 0 | 2        | 2  | 1  | 0 | 0 | 21446     |          |          |        |
| PKO2        | Polycystin-1 PKO2_HUMAN            | 37.96 | 5  | 4  | 2  | 1 | 4  | 8  | 1  | 1 | 4        | 1        | 4        | 4,21E+06 | 3,38E+05 | 0        | 0        | 1,45E+05 | 2,39E+06 | 0        | 0        | 0        | 0 | 0 | 0 | 0 | 0 | 9,62E+04 | 10 | 10 | 8 | 5 | 0         | 109691   |          |        |
| ADRFN3      | Polycystin-1 ADRFN3_HUMAN          | 37.96 | 11 | 5  | 2  | 5 | 15 | 3  | 0  | 6 | 4        | 2        | 6        | 4,21E+06 | 3,38E+05 | 0        | 0        | 1,45E+05 | 2,39E+06 | 0        | 0        | 0        | 0 | 0 | 0 | 0 | 0 | 0        | 0  | 0  | 0 | 0 | 8         | 8        | 43917    |        |
| GGY2        | GRB10-interacting GYF2_HUMAN       | 37.85 | 1  | 1  | 1  | 0 | 0  | 0  | 1  | 1 | 0        | 0        | 0        | 1,05E+05 | 1,42E+05 | 2,00E+05 | 0        | 0        | 0        | 0        | 0        | 0        | 0 | 0 | 0 | 0 | 0 | 0        | 0  | 0  | 0 | 0 | 0         | 150070   |          |        |
| ETES86      | GRB10-interacting ETS86_HUMAN      | 37.85 | 2  | 2  | 2  | 0 | 0  | 0  | 0  | 0 | 0        | 0        | 0        | 1,05E+05 | 1,42E+05 | 2,00E+05 | 0        | 0        | 0        | 0        | 0        | 0        | 0 | 0 | 0 | 0 | 0 | 0        | 0  | 0  | 0 | 0 | 0         | 96241    |          |        |
| ARMAD10     | Armadio-1 ARMAD10_HUMAN            | 37.77 | 0  | 0  | 0  | 0 | 0  | 0  | 0  | 0 | 0        | 0        | 0        | 0        | 0        | 0        | 0        | 0        | 0        | 0        | 0        | 0        | 0 | 0 | 0 | 0 | 0 | 0        | 0  | 0  | 0 | 0 | 23495     |          |          |        |
| ARMAD11     | Armadio-1 ARMAD11_HUMAN            | 37.77 | 0  | 0  | 0  | 0 | 0  | 0  | 0  | 0 | 0        | 0        | 0        | 0        | 0        | 0        | 0        | 0        | 0        | 0        | 0        | 0        | 0 | 0 | 0 | 0 | 0 | 0        | 0  | 0  | 0 | 0 | 37540     |          |          |        |
| ARMAD19PWR7 | Armadio-1 ARMAD19PWR7_HUMAN        | 37.77 | 0  | 0  | 0  | 0 | 0  | 0  | 0  | 0 | 0        | 0        | 0        | 0        | 0        | 0        | 0        | 0        | 0        | 0        | 0        | 0        | 0 | 0 | 0 | 0 | 0 | 0        | 0  | 0  | 0 | 0 | 17035     |          |          |        |
| H7C2M7      | Armadio-1 H7C2M7_HUMAN             | 37.77 | 0  | 0  | 0  | 0 | 0  | 0  | 0  | 0 | 0        | 0        | 0        | 0        | 0        | 0        | 0        | 0        | 0        | 0        | 0        | 0        | 0 | 0 | 0 | 0 | 0 | 0        | 0  | 0  | 0 | 0 | 20565     |          |          |        |
| RT25        | 28S ribosomal protein RT25_HUMAN   | 37.73 | 17 | 10 | 17 | 0 | 0  | 0  | 0  | 0 | 7,38E+05 | 1,59E+06 | 5,45E+05 | 2,37E+06 | 8,60E+05 | 0        | 0        | 0        | 0        | 0        | 0        | 0        | 0 | 0 | 0 | 0 | 0 | 0        | 0  | 0  | 0 | 0 | 0         | Mutation | 20116    |        |
| ETEPW2      | 28S ribosomal protein ETEPW2_HUMAN | 37.73 | 15 | 15 | 15 | 0 | 0  | 0  | 0  | 0 | 4,29E+05 | 1,59E+06 | 5,45E+05 | 1,61E+06 | 8,60E+05 | 0        | 0        | 0        | 0        | 0        | 0        | 0        | 0 | 0 | 0 | 0 | 0 | 0        | 0  | 0  | 0 | 0 | 0         | Mutation | 12946    |        |
| DIS2        | Disability-1 DIS2_HUMAN            | 37.71 | 0  | 9  | 0  | 0 | 0  | 0  | 0  | 0 | 9,51E+05 | 0        | 0        | 0        | 0        | 0        | 0        | 0        | 0        | 0        | 0        | 0        | 0 | 0 | 0 | 0 | 0 | 0        | 0  | 0  | 0 | 0 | 0         | 21444    |          |        |
| FRM6        | Formin-6 FRM6_HUMAN                | 37.73 | 3  | 0  | 6  | 0 | 0  | 0  | 0  | 0 | 2,39E+04 | 3,89E+04 | 0        | 4,75E+04 | 2,48E+05 | 0        | 0        | 0        | 0        | 0        | 0        | 0        | 0 | 0 | 0 | 0 | 0 | 0        | 0  | 0  | 0 | 0 | 0         | 72024    |          |        |
| K7E5Z5      | Xaa-Pro dipeptidase K7E5Z5_HUMAN   | 37.61 | 2  | 3  | 1  | 0 | 0  | 0  | 2  | 2 | 2        | 1,79E+05 | 1,07E+06 | 2,10E+05 | 2,48E+05 | 1,88E+06 | 3,25E+05 | 4,73E+04 | 0        | 0        | 0        | 0        | 0 | 0 | 0 | 0 | 0 | 0        | 0  | 0  | 0 | 0 | 0         | 56525    |          |        |
| BAG2        | BAG family BAG2_HUMAN              | 37.53 | 5  | 9  | 0  | 4 | 9  | 13 | 9  | 4 | 5        | 4        | 2,28E+06 | 4,67E+05 | 7,73E+05 | 1,19E+06 | 2,88E+06 | 1,52E+06 | 5,05E+05 | 5,99E+05 | 0        | 1,66E+06 | 0 | 0 | 0 | 0 | 0 | 0        | 0  | 0  | 0 | 0 | 0         | 0        | 23772    |        |
| ADRM1       | Proteasome ADRM1_HUMAN             | 37.5  | 4  | 4  | 4  | 0 | 0  | 4  | 4  | 4 | 0        | 4        | 9,67E+05 | 9,34E+05 | 5,68E+05 | 7,65E+05 | 1,09E+06 | 5,05E+05 | 8,23E+04 | 1,41E+05 | 0        | 0        | 0 | 0 | 0 | 0 | 0 | 0        | 0  | 0  | 0 | 0 | 0         | 42153    |          |        |
| AD05FWX59   | Proteasome AD05FWX59_HUMAN         | 37.5  | 4  | 4  | 4  | 0 | 0  | 4  | 4  | 4 | 0        | 4        | 9,67E+05 | 9,34E+05 | 5,68E+05 | 7,65E+05 | 1,09E+06 | 5,05E+05 | 8,23E+04 | 1,41E+05 | 0        | 0        | 0 | 0 | 0 | 0 | 0 | 0        | 0  | 0  | 0 | 0 | 0         | 37505    |          |        |
| MP2K2       | Dual specific MP2K2_HUMAN          | 37.43 | 3  | 6  | 0  | 0 | 0  | 0  | 0  | 0 | 0        | 2,25E+05 | 2,18E+06 | 2,52E+06 | 0        | 0        | 0        | 0        | 0        | 0        | 0        | 0        | 0 | 0 | 0 | 0 | 0 | 0        | 0  | 0  | 0 | 0 | 0         | 44424    |          |        |
| U1A1        | NEDD8-actin U1A1_HUMAN             | 37.36 | 0  | 3  | 0  | 0 | 0  | 0  | 0  | 0 | 0        | 0        | 0        | 0        | 0        | 0        | 0        | 0        | 0        | 0        | 0        | 0        | 0 | 0 | 0 | 0 | 0 | 0        | 0  | 0  | 0 | 0 | 0         | 60246    |          |        |
| J3QRAS      | NEDD8-actin J3QRAS_HUMAN           | 37.36 | 0  | 14 | 0  | 0 | 0  | 0  | 0  | 0 | 0        | 0        | 0        | 0        | 0        | 0        | 0        | 0        | 0        | 0        | 0        | 0        | 0 | 0 | 0 | 0 | 0 | 0        | 0  | 0  | 0 | 0 | 0         | 14384    |          |        |
| H3BMR3      | NEDD8-actin H3BMR3_HUMAN           | 37.36 | 0  | 16 | 0  | 0 | 0  | 0  | 0  | 0 | 0        | 0        | 0        | 0        | 0        | 0        | 0        | 0        | 0        | 0        | 0        | 0        | 0 | 0 | 0 | 0 | 0 | 0        | 0  | 0  | 0 | 0 | 0         | 12951    |          |        |
| NLEFE       | Negative NLEFE_HUMAN               | 37.32 | 0  | 0  | 0  | 0 | 0  | 0  | 0  | 0 | 0        | 0        | 0        | 0        | 0        | 0        | 0        | 0        | 0        | 0        | 0        | 0        | 0 | 0 | 0 | 0 | 0 | 0        | 0  | 0  | 0 | 0 | 0         | 43240    |          |        |
| AD0A0MT02   | Negative AD0A0MT02_HUMAN           | 37.32 | 0  | 0  | 0  | 0 | 0  | 0  | 0  | 0 | 0        | 0        | 0        | 0        | 0        | 0        | 0        | 0        | 0        | 0        | 0        | 0        | 0 | 0 | 0 | 0 | 0 | 0        | 0  | 0  | 0 | 0 | 0         | 33611    |          |        |
| AD0A0MSN9   | Negative AD0A0MSN9_HUMAN           | 37.32 | 0  | 0  | 0  | 0 | 0  | 0  | 0  | 0 | 0        | 0        | 0        | 0        | 0        | 0        | 0        | 0        | 0        | 0        | 0        | 0        | 0 | 0 | 0 | 0 | 0 | 0        | 0  | 0  | 0 | 0 | 0         | 38080    |          |        |
| EP9D43      | Negative EP9D43_HUMAN              | 37.32 | 0  | 0  | 0  | 0 | 0  | 0  | 0  | 0 | 0        | 0        | 0        | 0        | 0        | 0        | 0        | 0        | 0        | 0        | 0        | 0        | 0 | 0 | 0 | 0 | 0 | 0        | 0  | 0  | 0 | 0 | 0         | 30064    |          |        |
| AD0A0Z360   | Negative AD0A0Z360_HUMAN           | 37.32 | 0  | 0  | 0  | 0 | 0  | 0  | 0  | 0 | 0        | 0        | 0        | 0        | 0        | 0        | 0        | 0        | 0        | 0        | 0        | 0        | 0 | 0 | 0 | 0 | 0 | 0        | 0  | 0  | 0 | 0 | 0         | 73020    |          |        |
| MA2A1       | Alpha-man MA2A1_HUMAN              | 37.3  | 2  | 2  | 1  | 0 | 1  | 5  | 2  | 0 | 0        | 1,13E+05 | 3,43E+05 | 1,68E+05 | 0        | 1,30E+05 | 1,88E+06 | 0        | 0        | 0        | 0        | 0        | 0 | 0 | 0 | 0 | 0 | 0        | 0  | 0  | 0 | 0 | 0         | 1        | Mutation | 131140 |
| IMAA        | Importin IMAA_HUMAN                | 37.29 | 0  | 2  | 5  | 0 | 0  | 0  | 0  | 0 | 0        | 1,35E+05 | 5,90E+05 | 1,66E+05 | 0        | 0        | 0        | 0        | 0        | 0        | 0        | 0        | 0 | 0 | 0 | 0 | 0 | 0        | 0  | 0  | 0 | 0 | 0         | 57811    |          |        |
| HOY4S9      | Importin HOY4S9_HUMAN              | 37.29 | 0  | 14 | 30 | 0 | 0  | 0  | 0  | 0 | 0        | 1,35E+05 | 5,90E+05 | 1,66E+05 | 0        | 0        | 0        | 0        | 0        | 0        | 0        | 0        | 0 | 0 | 0 | 0 | 0 | 0        | 0  | 0  | 0 | 0 | 0         | 0        | 10177    |        |
| S1TM        | SARF-like S1TM_HUMAN               | 37.28 | 2  | 2  | 3  | 0 | 0  | 0  | 1  | 1 | 0        | 0        | 1,01E+07 | 2,44E+06 | 3,59E+06 | 5,74E+06 | 1,35E+06 | 9,52E+05 | 0        | 0        | 0        | 0        | 0 | 0 | 0 | 0 | 0 | 0        | 0  | 0  | 0 | 0 | 0         | 0        | 11749    |        |
| GLF1        | Transferrin GLF1_HUMAN             | 37.26 | 2  | 2  | 0  | 0 | 0  | 2  | 2  | 0 | 0        | 0        | 9,51E+05 | 0        | 0        | 0        | 0        | 0        | 0        | 0        | 0        | 0        | 0 | 0 | 0 | 0 | 0 | 0        | 0  | 0  | 0 | 0 | 0         | 0        | 74328    |        |
| HMGCL       | Hydroxymethyl HMGCL_HUMAN          | 37.25 | 4  | 4  | 4  | 0 | 0  | 0  | 0  | 0 | 0        | 4        | 3,94E+04 | 0        | 0        | 0        | 0        | 0        | 0        | 0        | 0        | 0        | 0 | 0 | 0 | 0 | 0 | 0        | 0  | 0  | 0 | 0 | 0         | 0        | 34360    |        |
| YAP1        | Transcript YAP1_HUMAN              | 37.22 | 3  | 0  | 0  | 0 | 0  | 0  | 0  | 0 | 0        | 0        | 0        | 0        | 0        | 0        | 0        | 0        | 0        | 0        | 0        | 0        | 0 | 0 | 0 | 0 | 0 | 0        | 0  | 0  | 0 | 0 | 0         | Mutation | 54462    |        |
| THTR        | Transcript THTR_HUMAN              | 37.2  | 0  | 4  | 0  | 0 | 0  | 6  | 6  | 0 | 0        | 0        | 1,77E+05 | 0        | 0        | 0        | 1,55E+06 | 3,40E+05 | 9,96E+04 | 7,13E+05 | 0        | 0        | 0 | 0 | 0 | 0 | 0 | 0        | 0  | 0  | 0 | 0 | 0         | 0        | 0        | 33429  |
| TES         | Testin TES_HUMAN                   | 37.15 | 0  | 2  | 3  | 4 | 0  | 3  | 3  | 0 | 0        | 0        | 2,25E+05 | 2,49E+05 | 2,37E+05 | 0        | 2,56E+05 | 3,38E+05 | 9,78E+04 | 0        | 0        | 0        | 0 | 0 | 0 | 0 | 0 | 0        | 0  | 0  | 0 | 0 | 0         | 0        | 47996    |        |
| FRW7D0      | Testin FRW7D0_HUMAN                | 37.15 | 0  | 18 | 0  | 0 | 0  | 18 | 18 | 0 | 0        | 0        | 2,25E+05 | 2,49E+05 | 2,37E+05 | 0        | 2,56E+05 | 3,38E+05 | 9,78E+04 | 0        | 0        | 0        | 0 | 0 | 0 | 0 | 0 | 0        | 0  | 0  | 0 | 0 | 0         | 0        | 8970     |        |
| SPART       | Spartin SPART_HUMAN                | 37.13 | 0  | 4  | 4  | 0 | 0  | 0  | 0  | 0 | 0        | 0        | 9,91E+05 | 2,38E+05 | 0        | 0        | 0        | 0        | 0        | 0        | 0        | 0        | 0 | 0 | 0 | 0 | 0 | 0        | 0  | 0  | 0 | 0 | 0         | 0        | 72833    |        |
| J3KQ6       | Receptor J3KQ6_HUMAN               | 37.05 | 0  | 0  | 0  | 0 | 0  | 3  | 3  | 0 | 0        | 0        | 0        | 0        | 0        | 0        | 0        | 0        | 0        | 0        | 0        | 0        | 0 | 0 | 0 | 0 | 0 | 0        | 0  | 0  | 0 | 0 | 0         | 0        | 72648    |        |
| STR6        | Receptor STR6_HUMAN                | 37.05 | 0  | 0  | 0  | 0 | 0  | 3  | 3  | 0 | 0        | 0        | 0        | 0        | 0        | 0        | 0        | 0        | 0        | 0        | 0        | 0        | 0 | 0 | 0 | 0 | 0 | 0        | 0  | 0  | 0 | 0 | 0         | 0        | 73503    |        |
| IBN08       | Receptor IBN08_HUMAN               | 37.05 | 0  | 0  | 0  | 0 | 0  | 3  | 3  | 0 | 0        | 0        | 0        | 0        | 0        | 0        | 0        | 0        | 0        | 0        | 0        | 0        | 0 | 0 | 0 | 0 | 0 | 0        | 0  | 0  | 0 | 0 | 0         | 0        | 50942    |        |
| Q5QP56      | Apoptosis Q5QP56_HUMAN             | 37.02 | 13 | 10 | 7  | 5 | 5  | 5  | 5  | 9 | 5        | 1,92E+06 | 1,84E+06 | 5,48E+06 | 4,66E+04 | 4,30E+05 | 9,94E+05 | 1,24E+06 | 1,54E+05 | 1,48E+05 | 3,29E+04 | 4,47E+05 | 4 |   |   |   |   |          |    |    |   |   |           |          |          |        |
